# Supplementary material for: The influence of negative mood on solitary drinking preference: An experiment with young adult solitary drinkers
Source: PLoS One. 2021 Feb 18;16(2):e0247202. doi: 10.1371/journal.pone.0247202 (PMC7891730; doi:10.1371/journal.pone.0247202)
Supplement: S2 File — (CSV) [file pone.0247202.s002.csv]

Null_AICs	Mod1_AICs	Mod2_AICs	Mod3_AICs	Mod4_AICs	Mod5_AICs	Mod6_AICs	Mod7_AICs	Mod8_AICs	Mod9_AICs
272.5831941	230.8499312	235.3237027	225.2937685	225.787528	227.0579451	231.2452443	221.4018322	224.535321	225.9037012
243.1702197	220.7972397	220.9469119	218.8699704	213.7634914	218.9432666	214.0937155	212.2849867	212.3447929	213.8876816
286.6081348	259.3409538	250.6452352	252.9472625	265.1271307	262.1110955	269.8915864	255.0610902	253.5695737	257.3980055
258.5359351	243.1956282	248.1952781	243.6015374	238.3551063	237.3982987	239.741445	234.8998918	222.362099	211.5908155
271.3229223	234.1929331	236.8215417	241.8721838	238.5264826	242.6992094	244.2721042	239.2354112	244.3888438	243.738204
277.6925306	254.432855	263.2475286	268.4378905	263.7209271	267.6023642	264.8116217	259.0275005	256.8387156	257.8664949
268.0776696	209.0084114	195.150658	209.1851008	214.8858443	217.1666469	221.3352601	219.4560166	219.0427859	218.4529437
246.5633409	225.1276528	227.6075654	223.6226157	225.4386748	231.570483	225.7794476	224.5000492	225.7007373	225.8500914
283.9390051	244.0559596	243.3636929	241.4544151	240.7273136	235.8849412	236.2501816	215.3528634	215.4840155	212.4441843
272.9699648	234.6272298	238.6177563	236.8443669	235.3712639	238.2702238	235.3325772	219.42407	217.0908206	217.4885965
293.4550073	266.6338948	267.1812637	263.5243741	259.1373601	264.0271701	266.5637631	261.9514489	258.0190536	259.0588654
291.3081441	275.674977	279.5546303	272.1695806	269.1903599	256.3072586	278.2043572	266.9414894	265.6758711	269.5115615
263.6303629	246.3259046	232.6146507	232.8221413	237.6745327	243.1066031	238.2360475	233.5923348	235.2594827	234.8378032
256.3755785	238.1976218	235.1651791	242.0047506	239.0897003	241.5416012	249.9211534	248.6295179	252.1444192	252.495414
289.0876986	267.3893733	260.1749711	261.772654	265.3478363	254.4435752	260.3742039	241.5491783	245.1888381	245.6949952
300.6174895	261.377324	235.3933831	235.2019776	250.664797	254.9320724	253.39355	245.8297465	239.4231433	245.3413049
269.0366576	244.4581297	234.0691432	234.3793348	243.6460503	251.2666227	253.1257895	247.4613537	243.115262	246.068305
274.6388586	239.8437415	226.8969314	245.342123	244.7435142	237.8635846	247.6775426	251.6894524	256.3795302	256.2419137
290.0945925	235.2309505	226.3917564	226.5596838	230.2700195	221.6656444	234.2087054	223.7935955	229.7114354	226.7994341
284.057646	282.5066353	288.3067664	281.1629267	275.7647773	279.5530834	249.9863657	267.4822749	267.1546479	260.3755304
243.1702197	222.9072742	211.1590999	222.5039521	219.7897024	212.8783619	220.200921	223.8915674	225.8652352	224.1644622
277.8050215	263.8133315	258.5611794	262.5798238	264.0009819	262.9220867	272.3893998	262.2948952	259.9515905	256.6352403
269.1120184	246.1088064	251.2533419	244.9330457	240.5416082	245.3676107	231.6412603	224.3794951	221.8263332	220.7269446
269.0386136	238.9417868	228.6910689	220.261003	229.0980724	233.6077858	237.0011496	225.4407086	225.6881158	228.2709215
262.1187156	244.8168897	244.4578421	245.3350657	246.3289247	238.3664992	244.1561034	238.5119301	234.3240389	228.2237004
282.1889558	253.9868061	253.0680529	250.1566866	253.0732721	252.5415143	261.2994626	251.3802656	254.8854751	253.9159327
288.1649289	256.4632374	252.9135505	252.7854731	251.2659592	247.8314226	249.6531952	234.6408705	229.0253943	235.7573792
253.2586389	241.7737237	238.7245332	238.6692708	239.7850506	237.6000438	244.4183829	241.7230019	238.8450193	236.9657245
270.4663665	228.97688	230.0429452	240.7545931	238.0411432	237.8301327	239.6941529	236.8917175	239.3700887	241.9465762
283.0769816	266.3204013	258.6134217	253.6201629	250.3025359	252.7001895	233.4253443	248.3790089	230.0553361	232.9644469
261.5607986	265.6876966	267.9416739	262.6281903	258.8167089	258.7655778	258.6574276	259.2220259	262.6893558	258.1134936
271.4912781	259.4516304	261.6108696	260.2806884	260.700482	258.8397678	263.3397332	258.0446643	250.9609684	262.5394971
275.4314377	223.8346059	224.9652762	223.6890562	226.1059327	229.7677952	217.1615797	215.1696097	203.2537822	205.1917104
257.6542441	239.8404328	235.8471866	225.2940767	219.8687458	229.4422918	227.2619827	227.4309307	219.5058275	228.0038562
264.6340195	252.1263451	236.7441362	233.5052413	241.4637055	238.4981502	232.7872323	243.5226203	243.9282089	234.0806728
269.9111869	238.3107613	237.7052743	228.907139	230.1627299	230.5378559	230.5734893	228.3073862	229.5704786	229.7310319
250.2924116	235.1193216	240.7687029	236.7856442	232.6480486	236.8235859	229.1125233	227.6820717	232.9077684	229.9088953
271.2769103	240.1615074	227.5421513	238.3690746	235.0581596	242.5889345	234.9737243	219.8002561	216.9461208	221.6953931
261.930353	238.5158665	237.8268118	233.5482663	236.2912816	238.2605513	240.0950302	239.7264408	232.6137757	235.6426837
269.0029445	255.3492535	258.4490071	265.0537595	262.7380762	256.3095443	266.4771036	259.165699	263.10672	249.649613
254.0730551	217.4975361	203.4029894	217.0709293	220.9963596	221.4907226	222.4615761	228.8257559	221.4420884	218.2923109
284.3438625	258.7347605	250.6650246	247.3007092	244.0660295	250.5577567	245.9178526	238.3223805	229.0713624	237.8470025
237.8613467	220.3478221	224.5958823	219.7084491	216.0353063	221.9214328	223.8168262	223.2745675	224.0452451	222.2084464
262.4307065	222.5166201	216.0192743	212.8037906	214.9868428	218.3245426	222.9344504	216.0345547	220.755333	218.4758502
300.6359021	278.1753634	285.6480981	289.9031774	286.9490869	281.2356888	276.8879359	265.8151817	252.2549863	261.6234381
276.9532981	257.7571505	252.8653051	246.5287797	246.9345988	243.5306356	250.8244022	245.6834129	248.9364705	242.2683511
269.1120184	244.853444	235.9996109	239.7985561	250.4293605	253.8071664	252.7389345	254.602324	260.557405	257.2190665
300.4052563	240.2467748	232.539314	245.2327956	250.5242091	251.1546218	252.8993621	249.5003573	241.1692986	249.3345226
292.3866119	266.4303027	267.446939	270.0994688	267.8973323	264.8117972	270.0643616	255.8929937	257.7309252	259.7387573
305.2013176	268.4434464	261.6043625	254.5937774	257.1239299	252.0892118	255.0584403	247.6873704	234.8379828	238.8545146
270.5792233	243.3315932	232.0782373	238.2834859	236.8462346	238.7231539	225.1383766	227.0380932	230.0962449	230.1571111
297.6635762	288.3306272	274.9067403	267.1708861	266.5928184	261.7626452	267.9959094	259.7380367	262.1494513	262.8501208
286.0382637	245.3264924	245.6136	242.9762168	240.7732694	244.3343497	232.4155024	222.8180304	223.6474377	216.4590565
282.6338039	257.2304092	253.7479095	263.105245	259.3798626	261.9072465	264.3433728	256.6551531	260.2875754	259.5418861
271.5900195	245.2411558	238.7591332	238.2947062	239.5908327	245.1683041	247.9794095	242.5658888	247.4201732	243.0996286
271.8295525	221.5447598	197.867687	217.332122	226.2385544	227.8706113	226.7136565	215.2971921	219.4607428	220.6154558
294.0537528	277.7474496	262.2080124	266.8891214	274.3876723	274.9240345	276.4866495	276.1472803	277.6944543	276.4033584
245.4330058	232.0670747	226.5054309	232.3126803	226.6897331	229.1515455	218.2696903	222.0225639	224.0852383	227.9944151
263.3973096	239.8919024	226.9455573	218.4194932	212.6885736	218.152277	223.8094932	222.3405308	226.4677155	227.7529773
275.5405587	250.1089741	244.9567195	242.4667026	243.7590905	237.8661811	221.4099785	221.2628481	217.6785725	219.5965202
262.5528566	234.9592373	243.8385121	240.6100637	236.7381166	231.5187945	236.1522288	231.3458594	233.9557751	231.4692637
274.6122834	247.6732356	250.1597264	248.8993754	249.2751683	244.2467942	233.5388552	238.9069546	236.8981854	239.5491449
264.4614909	237.273857	239.6999518	237.4491717	233.0787111	237.2541258	231.7940731	227.5263829	223.0247727	229.4164755
288.0693308	259.9466265	256.1442149	267.0243232	264.2470754	265.1753045	262.7853637	254.2899061	253.4039846	254.3991522
281.6501083	253.0011563	252.4810239	250.2205684	246.25416	239.7057677	245.4962457	243.6449115	237.6022763	248.9859961
268.2571952	249.3521398	246.9484781	244.1060065	240.1063541	242.0759827	230.6833383	216.7863327	220.6949499	219.0092463
268.5314277	238.3125135	217.8739462	222.6320729	235.0720106	239.1640445	240.6674944	234.9121646	235.5357982	239.2152559
296.7429696	263.7727762	268.4074201	261.3989068	260.4101415	258.9672774	244.6324589	238.3189073	239.6023872	222.2717161
304.7112022	282.9353455	277.4158362	273.4487827	277.6902386	269.8711937	280.9082461	259.9256226	262.178886	265.2094056
268.2920835	244.4266429	238.7692757	234.7121128	240.6357857	239.2574053	233.9373151	227.9132368	222.9341183	229.4062319
280.1636813	261.0159818	260.1567801	258.9760863	257.3797759	254.327887	259.893892	247.3121954	239.3283293	252.2267526
272.4950046	263.4250829	257.0644025	258.1675908	255.0310511	252.521299	254.7797749	253.0233336	246.4751414	241.9803241
266.5257931	240.5906305	248.04364	245.4303311	242.3051217	246.1246692	237.3526877	231.4643323	215.1195236	235.7805353
283.8507995	244.3614159	241.4792905	242.9553858	245.6267648	242.2222808	225.6233856	224.6016588	228.27898	221.1930646
264.7014278	241.5225952	238.4399627	233.9567616	230.2799315	230.1544427	231.865892	227.9546602	212.8328422	216.3922434
271.2849695	256.490559	251.5273452	243.6010991	247.8560046	242.3920499	258.9871888	247.201449	252.5740034	250.2840592
281.6501083	259.4469181	241.6219624	245.9630383	244.0131403	249.4754506	242.9755095	241.1129604	243.643908	238.8837529
253.4456213	227.1693219	223.7528727	218.1147294	214.404496	219.0496411	219.1956511	211.029666	215.692108	216.2172346
285.6675316	237.0888721	233.1299277	228.3506128	227.3952924	218.5115698	224.3736082	213.4585513	206.6907081	208.2423583
284.3981682	260.6181727	251.1697475	252.1047163	247.5881188	239.0009467	241.5958441	220.060846	217.3959181	219.6296515
292.3866119	260.1951564	258.5958021	256.9515587	255.9725478	260.5400364	261.5923941	258.196922	263.6507121	262.1919071
276.3005897	274.04119	266.4950064	263.8472083	267.4098405	259.4227412	266.7879345	260.2382064	256.746092	257.3379687
285.9335645	261.4243121	256.263442	249.2589102	253.4770454	245.2691503	239.0461463	227.3521236	214.4680411	218.7674064
282.5136432	264.4916961	265.1279121	261.5306106	259.3330148	261.0402927	259.1929906	256.0802313	256.018243	254.0753839
285.5329337	270.5429719	262.3835189	260.1014267	265.4096372	264.9597584	266.5481065	251.0279457	242.07451	244.426733
268.8202245	247.194623	234.856333	233.0154919	246.5318814	248.8503318	250.0875366	251.358264	252.9313815	255.4722547
263.5827318	232.9931144	201.0382909	213.3858051	226.9785437	232.9463877	230.8748165	221.5663344	222.8283685	222.7865002
266.9129759	235.7297529	241.7647507	252.4479487	248.2758673	247.6979361	234.4215162	231.9644482	234.5298439	234.249273
280.3050061	284.520855	272.4890157	270.1093835	269.4249817	259.3966724	267.0336664	249.704017	248.1552517	253.8671682
272.6408342	240.7641871	232.0429963	232.7959613	236.9007153	231.2512708	242.2869524	234.6247743	229.6162123	233.5888822
292.5065102	281.9117246	282.5452441	279.0446123	274.2073406	276.7077417	274.7517606	264.6537658	265.2511515	261.6706942
295.8071814	252.7843189	254.0512214	266.8918914	265.6147957	261.4331391	259.0216515	259.2835474	264.4291428	258.00521
278.6285639	249.7213721	247.7479309	241.301837	240.4514029	241.6754942	241.0774782	235.2777787	219.6144494	232.9852836
281.1711489	259.6613192	261.5901647	264.6775877	260.4686769	259.4984157	255.7652339	247.8833894	250.7758071	245.2649846
286.6081348	241.8610116	238.4638018	251.427222	252.9022558	250.4816882	247.722558	237.7384234	243.1496428	238.7213533
269.8130171	235.9806848	240.9388125	237.3600058	232.9502088	235.1376394	222.7007661	220.7392814	219.2143294	225.5011623
308.9521839	306.1549826	287.4915633	284.7605337	285.6719833	282.7361536	287.7650681	272.4189267	267.6465428	274.5235002
293.1490227	271.7650585	271.2474781	278.2192802	276.9167658	274.5758002	270.9497171	272.4322304	270.2541473	267.5065194
282.5329128	224.8872697	192.2483663	199.4187989	226.0527435	224.203658	232.1685145	218.367718	219.1614392	218.5723687
282.8724664	267.6970114	265.4797577	263.0365313	263.4625007	265.2812611	252.006683	251.1356136	234.9048593	246.2102174
269.8130171	238.4955775	240.1686074	235.6218556	231.9864611	238.9936826	233.3665693	225.6967753	228.5060653	228.9368937
272.3652597	233.4280665	218.7485993	236.0856816	236.2986768	219.222973	244.1355015	236.0873617	240.8933389	230.5155512
256.6452558	222.3779445	212.8556677	226.6390838	233.2805157	238.6471682	239.9165113	227.6064171	232.5925259	225.2876165
252.6421669	241.5875056	239.1537533	233.9011161	233.295734	234.2237283	236.3767206	230.342679	212.7123316	231.9081874
285.1009217	272.9863118	276.0601777	277.8781592	278.5340789	280.1975326	276.9764902	278.3252968	282.0933973	283.1234747
296.5584164	274.3695112	277.4620319	283.7593391	280.7482279	278.8977337	281.0141228	277.0932663	278.1165639	276.8516484
258.3642411	229.4380668	230.7436734	228.8159919	225.6978738	224.6170527	234.2744893	229.593192	232.1147806	227.0674148
248.8513618	218.6850696	209.8573813	224.4905527	223.1929188	219.1712026	216.4246152	210.9318091	216.5691111	208.4228155
302.8467999	293.792545	291.569299	291.3743454	290.794957	277.6067021	292.8808661	289.306697	287.1561125	277.1630348
286.3085014	252.6234127	253.913366	247.8167343	247.830083	238.1778093	248.5762468	239.2169778	240.473258	239.6466833
275.5405587	229.7837996	222.7548369	229.7463179	228.2757033	231.0097358	228.6843698	218.8131135	220.5554064	221.2756131
285.9335645	264.3380523	257.6803599	254.0350374	255.5675033	256.8905335	260.8603907	243.7002159	243.6669357	247.1423487
285.568812	263.2203241	265.1277611	267.422837	266.396984	267.6762064	272.6010923	269.9203879	274.6171202	267.8623154
306.2219309	285.7247996	280.3304587	274.6700993	272.0351881	261.2364186	271.4085322	252.0491285	248.0726753	253.2182113
263.563647	231.8514201	238.6768605	235.2679855	231.7296799	233.8799103	229.5025812	230.4449854	227.7266099	232.9526846
275.7432272	258.4639658	265.4687266	262.3542828	261.257842	263.9682404	266.5298889	263.0927978	266.5913233	267.0993266
256.0632338	210.4230562	209.1307943	211.8364051	207.0237277	208.1202969	207.0448991	195.623659	197.6665568	197.8253836
283.0162879	280.8739116	285.0061527	278.6379289	278.5097707	284.1330002	276.5749409	275.8578769	264.0264783	277.0526599
246.5633419	229.8503762	228.3464071	218.9151302	216.411012	223.3030534	226.136637	226.1472	231.8960715	223.8732146
279.0895638	245.6282189	246.1956388	251.888073	249.5422285	247.6776595	245.4312575	245.966737	251.5205928	250.9531445
254.0820255	229.3848064	229.4159981	226.4908723	230.0989712	239.2566954	236.4663999	237.1203287	242.6669697	234.6634681
300.6478186	236.862138	229.2572095	241.3872713	248.8535077	238.6596896	248.3672452	235.6270981	238.6371736	240.697263
277.0487616	259.1221165	257.43582	253.6662963	250.6771414	254.6247462	239.0061811	236.7042781	224.4089056	242.0446211
267.0504075	246.7340834	251.908835	262.4153338	259.6868499	261.6327482	249.7617244	248.3093749	251.330204	245.6915109
291.5977423	258.3952208	256.3825822	251.7919928	254.5692114	252.2153547	250.7408258	241.7833153	241.7039374	231.7393417
262.3554094	242.1089885	243.8958907	242.6143782	240.0038353	226.2363952	230.8606149	225.1406257	230.8009023	224.679083
287.7079808	268.4736656	259.3201853	257.0729658	257.9034106	238.6469634	258.2863641	228.9158607	215.7192666	228.6372159
276.5512448	247.2449469	232.6621573	224.4457957	239.5836974	238.8043364	234.7090611	229.9604228	230.7751406	226.7551995
258.3247293	230.5170217	224.844057	222.5025527	226.7001567	224.8524605	231.5882505	215.0953816	211.7360965	215.5796264
246.5633419	221.2000757	221.1038937	231.0307831	226.3118443	232.7099933	232.4059836	220.118329	223.4235639	220.5451887
286.1265418	251.2526458	251.7820143	255.8965586	258.6972421	260.4181874	224.4323087	226.5465166	229.7033742	226.7979269
279.7462884	264.6549255	250.4973091	252.8622562	254.0997372	258.4133752	258.4060409	256.7415223	259.00051	257.6866729
283.1902228	273.1708116	275.1177001	279.6183705	277.4661403	274.6239783	272.3252518	270.9453504	274.3717464	270.0039458
302.0772085	234.511703	221.5797937	226.6041497	231.3723374	227.756739	227.9192858	223.4169491	220.8015522	222.8597341
245.581702	229.2554613	231.8258654	224.9158476	220.3424064	220.2336986	197.8501727	192.0046672	180.8764557	191.5503435
289.9813514	265.7057192	257.3163352	263.0233782	263.4705041	263.5840157	264.4591585	257.2465751	255.763611	250.5525746
266.3180592	230.5703133	229.2532103	232.8283581	234.7501704	241.5632904	229.7663485	229.6427636	234.8549994	229.7990865
284.3655282	242.397167	249.2637041	247.5163676	243.8835119	249.4870531	251.3084798	241.5714014	244.7868794	243.6448003
278.760025	231.0857964	229.5979508	245.1034677	243.7377013	230.8974505	232.5263571	213.2653062	216.4508223	199.1104301
273.1482534	247.6512985	228.7424998	229.306038	248.4594787	249.4970513	252.9079193	245.600357	231.9493819	244.7359643
274.413358	255.417136	257.1891461	253.9415664	249.7553481	252.9602252	249.9845035	245.2266387	250.0405453	242.9258326
261.0608847	223.8760689	223.5261799	224.3727059	225.879161	230.4986575	233.1213198	231.2783482	232.5763926	235.2476255
270.4663665	234.5014395	226.8995842	220.4665081	223.915939	220.9927154	229.9434355	218.3326523	221.4169021	215.2435525
271.5380249	255.3553941	247.4159232	246.0119361	247.7253133	251.3049595	239.6294326	243.591066	243.9245924	245.9918069
276.3005897	263.281572	253.1088565	265.3177108	262.7546849	250.8188544	256.5636361	233.029136	232.0145338	224.1287187
256.644089	209.7382734	205.5572456	198.7609083	208.7662176	193.9065612	202.7234208	202.7535404	192.5577991	205.0916145
273.0051227	231.7642266	226.6086934	220.7344046	223.4049638	219.7713842	232.0969043	220.3236281	224.3743623	225.0808075
301.7021601	276.0765145	279.3850333	288.9193831	285.2965107	279.5936869	280.6112817	265.442092	259.2433798	265.7068403
307.883563	262.734106	265.474088	274.6269165	269.9813302	263.2640543	255.6346464	245.8437076	241.3862685	244.8366149
259.6437068	243.1393334	246.1175313	242.1466786	236.9359499	237.9089577	235.7096629	218.7708756	218.3201383	219.595519
266.1594608	247.5779942	240.2750028	248.0886579	243.5721378	246.8046381	245.8294418	219.108277	222.1358666	222.5299829
282.8881566	254.7086214	240.8680048	266.8833646	272.2275686	278.6641497	277.9207413	272.5313034	275.8736809	275.9815254
276.0095201	257.6996784	255.1901685	251.9985248	255.6436812	253.4565119	249.8898591	237.6136936	238.9961176	239.7870041
285.5431424	262.9946309	260.752249	258.4897195	257.1254731	252.8816662	258.5967348	236.7836821	242.1514482	242.7110044
299.8476858	287.4135046	287.1160107	286.6096597	283.5407859	285.4302784	276.5742215	253.7647483	254.9580384	258.7040517
252.2646956	219.7783721	203.7026202	205.7103519	211.3737813	205.3318629	217.370144	211.4865141	213.1782568	216.4533875
285.5329337	269.654315	260.4827483	258.5706441	274.76207	275.1722225	279.7003369	267.7404427	270.889898	268.3796621
269.8130171	264.4389823	271.4699787	263.5346119	260.1926989	263.0560107	258.095895	251.9054684	254.3108044	249.7942109
263.1469766	237.3599649	242.7874068	244.686898	244.9698001	246.328301	254.7193264	247.8527047	246.493687	248.9284402
271.0661808	237.8677094	231.0702429	223.5917729	224.5424628	216.264994	218.1885838	208.8358386	206.0239074	203.1505169
247.3243718	214.3038189	209.7952445	215.2700929	214.4096241	219.5807668	222.0427099	214.0677209	212.0578796	214.2547827
291.0569239	267.5535532	264.4239685	256.8457041	259.8034871	257.88201	262.9680117	247.0030714	246.8804283	248.4752108
264.1279965	253.6834132	245.8948368	248.8277326	245.7558653	246.526797	250.6424638	249.5308065	245.5025879	250.0227023
270.9509198	248.2022565	246.504943	247.7866113	251.0263464	253.8863142	232.6079403	222.7671579	220.4072112	218.9648657
274.0742431	259.6241054	265.6343314	264.075827	261.2747324	260.6794416	266.9611532	261.4337988	259.3489324	262.593696
277.3263224	245.2579134	242.8585354	241.1090847	240.8139524	240.4294862	242.1394274	230.87449	234.8582963	232.7009316
303.4170942	280.0673506	276.3637824	278.0305565	280.6075204	278.6090555	283.9318917	275.5956628	273.095327	269.8968455
273.5559761	277.2786148	272.2477304	272.1756821	269.3809699	259.767318	265.7586635	259.8703338	260.3761476	261.529132
280.7499598	242.8343043	250.301895	257.6428336	252.5764528	252.8877549	238.4934886	239.5114632	241.7129303	237.4265244
247.3243718	215.1614593	194.8802138	192.5487541	207.9692852	210.8863415	205.3603681	199.0516243	201.0098269	198.006781
270.878838	243.3628735	247.9633896	243.6320055	239.650427	235.4681502	230.3485712	235.6575896	238.5537432	221.4103322
280.1202275	228.3087917	233.5187287	239.2563393	236.8305987	233.2523787	237.8097609	230.6669534	234.8357372	235.216113
285.9060743	258.3936881	254.9371474	251.0206865	254.1845373	252.9570815	256.0802674	238.4898704	242.0849522	237.7018855
298.7405717	263.8257071	240.9947508	234.2016432	240.051966	240.9772733	246.7694014	226.8261707	219.2728953	225.4764619
292.0444014	257.8478875	257.7226601	260.8655023	259.0288401	254.1267377	262.5402648	252.4412724	239.4370841	240.0233506
268.5951838	248.8480992	254.9600572	248.1439447	248.9811866	248.6428993	241.9371895	233.939689	235.9368653	227.7959315
256.7607977	235.7484826	238.9791404	235.759174	234.6923824	239.61808	239.2671646	232.2212053	236.0974003	235.8801153
266.1460452	229.0799792	230.0977385	223.5016193	223.9874701	226.4638514	223.0574262	219.1021953	204.2535325	217.6268518
266.4168601	261.0886108	261.3403336	251.6777531	252.0067341	259.0437536	254.7696612	253.8209008	251.0602171	248.1702041
282.0890326	263.0149409	265.0782572	260.5527354	259.1015655	253.347447	267.9030531	257.4683451	257.9387325	256.3858378
285.6675316	276.7462622	278.4665259	276.8116179	277.0321404	280.2854124	278.9758536	269.5027648	268.8147831	257.2331399
283.7626808	246.2756079	204.7550924	203.5387583	212.1825184	216.2035846	212.4116343	210.7345357	198.2364314	208.0111883
286.3529047	268.3472969	264.0532531	267.4100525	266.8077402	266.3418271	262.9551465	268.4662293	270.9394894	271.7039756
265.792287	249.9411117	243.4831772	239.3765757	235.6254245	233.6504714	242.322124	239.0364741	235.8986035	238.4651366
263.5760046	223.3423182	227.867351	221.1742825	221.7438132	218.5306364	229.8167226	220.0981187	212.1316918	211.833435
291.8420142	276.1874562	270.9026999	269.2223387	269.5747276	267.308316	265.0817217	263.8304577	262.4641243	261.0694037
280.2972333	256.0960823	236.3768257	240.3589489	243.7632287	237.7935101	237.9324875	231.9182202	232.6931731	224.3309764
282.8724664	260.3707763	249.9899031	255.1082583	263.5366592	255.9248742	269.6112783	255.1098014	257.1082481	256.5466584
278.6495597	267.6674731	267.514212	264.010482	260.9543046	264.4093748	259.2802414	253.7339453	250.5283226	251.2864155
293.4370733	269.1819308	266.6902519	270.0808314	267.5925163	268.8927135	255.086509	229.2080255	233.2197919	232.6408125
294.4707258	266.269707	259.1028381	255.9148222	257.9488551	254.9201678	258.5259842	247.3548276	239.4705591	237.4684592
272.5831941	240.4551806	233.4143498	223.4717851	229.5129233	224.7719998	236.0055772	215.0909877	205.390069	212.1779467
272.2561387	246.3541918	225.7622334	236.211216	243.2928847	245.4970842	254.3291502	243.9206117	246.1625879	246.0718378
282.8694523	264.5521939	267.1669164	267.2591278	270.7427725	269.6856101	275.341841	269.7899646	267.5998155	271.5223628
275.2736702	260.1985127	246.6883264	239.8385216	242.9295287	248.9928029	244.7410318	238.0822487	232.7746339	232.9617783
278.4306272	238.3926863	214.9897234	213.1157516	219.7998481	220.4391546	225.6805881	212.9074793	210.7169056	214.9959787
284.6676397	289.7364622	293.8590555	286.3667824	287.1282739	283.4407397	291.160792	270.6751672	273.600802	250.0709164
263.4194365	253.3247711	247.6722155	252.3415354	255.938682	256.5381518	259.7898527	258.1096695	254.9355058	253.8257031
252.0834398	230.2379383	224.0942665	218.6328695	218.0728192	206.8933952	221.4073075	214.6919446	200.720724	198.6904157
251.4970529	220.6108311	209.6216677	207.8557325	201.9419171	199.8525545	198.0270856	193.5498834	184.8238024	194.2524479
291.8420142	262.2118988	265.2132468	256.6463209	255.6268343	252.8489131	254.2267484	246.2628007	250.9310257	249.8375203
294.7040075	272.767889	270.0013383	276.1304077	276.9627614	274.2177159	287.7163803	274.5428349	278.5367255	273.9049369
253.5411957	216.9665326	214.0831324	209.1358133	204.7884223	208.0188433	214.0620628	214.1837501	214.4836102	217.81796
289.8447213	275.8699334	266.0219606	268.0924628	269.9684443	269.5258761	262.9924065	255.6026517	247.5759263	238.0881025
271.9060427	251.0274552	250.3020592	244.6626631	246.7668356	249.526313	250.856633	244.8048854	248.5473264	244.1621583
290.1439293	262.074826	241.8623118	251.4715109	253.2251143	237.0802706	243.1311791	224.9497658	226.8283063	224.9254577
266.4348421	231.1043461	224.878972	215.9930088	212.1713392	209.5083091	211.7816276	213.2161088	208.9273419	211.7164297
268.0578345	238.5484042	245.3298459	250.2874977	245.0667308	241.508023	239.2049874	228.7781064	209.6272647	229.5944614
259.9251242	210.8835003	189.9953981	199.4360154	201.9792071	203.0377568	202.1790884	195.1240851	198.2555749	196.9485025
283.0938363	263.7806212	255.1975461	254.7638334	261.7564646	256.5428321	263.4667978	254.698048	252.6988195	253.2852553
296.2992753	259.2278027	252.5151627	246.723165	254.8138352	248.9251985	256.5366987	240.8200346	241.3185007	237.5725012
283.4982511	247.6643872	249.8233512	253.9776536	249.2111057	253.0685552	246.6972611	239.7783798	237.0652513	241.8230815
281.2035394	252.7742051	241.1888508	236.8103995	246.5072111	252.1770195	243.1088743	239.0018365	244.1033994	230.5488743
263.6303629	231.4001126	229.3763896	224.1382785	224.2907493	227.0393054	227.6711366	211.9071734	208.6963065	214.4449289
268.0627227	235.4595372	240.3485467	235.3285216	236.2331216	237.8736774	238.7482337	221.659739	227.2984939	226.4088599
295.3733311	254.6161757	237.3098099	249.9338998	256.8223768	244.895369	251.425724	245.3191271	248.4038304	245.7749214
283.1260484	265.9381588	272.9011768	265.8127052	260.4075094	257.0196988	257.219191	248.1016611	239.7124983	242.9290545
287.6880438	250.6883982	246.4005418	245.6043511	244.060319	238.3619245	239.5946523	242.7693416	236.1490359	242.6094771
273.8020939	229.3120838	218.3719777	221.328985	224.9105274	224.3836948	226.4419157	220.6383363	220.9260729	212.946326
280.803611	273.0572145	274.758323	268.1421107	263.6099046	269.724611	261.1527294	265.3569571	268.1740584	269.1502841
301.5059181	284.0398654	282.4708472	274.127671	275.1406354	270.6477889	259.2079621	262.3815972	260.5507122	258.6355308
244.8186931	221.0266231	222.6737619	219.8206277	215.388206	219.4691679	211.0648127	218.2936996	220.9072105	219.0499379
291.1521699	245.2193044	240.802765	246.5362475	253.5661213	237.7467242	245.455485	236.6699821	237.5036192	239.9277391
283.0758782	264.5206128	268.9170424	266.6732368	262.4948663	256.8816978	263.3128506	258.760393	264.0490132	263.9193749
248.8858463	210.6696095	207.6097867	220.0469166	217.8795559	220.7606671	226.2737127	216.2253067	213.3375407	219.2979924
266.5257931	226.7377027	234.9370202	230.4702565	227.1298848	225.5819554	235.5592135	218.9115012	219.3942495	221.0871131
268.671342	234.7769045	221.8071558	234.4086602	231.5365952	240.5631266	231.1067135	221.3413937	208.2294714	216.4909478
279.1754269	249.9359767	255.0054413	262.5830468	261.3572444	265.5173153	265.9800663	256.860016	257.9341349	243.1178856
293.9929019	259.7722465	247.8294844	245.0885122	249.6932667	254.5587511	249.048427	240.8254322	234.9948936	245.9218657
264.262698	253.1900889	234.6184679	241.4642576	247.9019656	250.6841292	255.1841443	247.3384686	250.9374364	245.066737
263.070184	231.4086186	231.4262059	235.051508	232.3118696	222.9104165	240.9727537	230.1115943	231.1971257	225.4325774
265.9952752	250.0230762	250.4110184	247.3831056	242.2781583	239.3972654	241.2688779	233.4458496	236.6235944	236.4004001
311.1519552	276.5489017	275.1146235	267.5330434	269.9641385	258.432745	258.0913712	245.4641638	240.8085898	240.2735825
287.3295864	252.6525269	248.9925017	262.0400984	259.6618129	261.4366227	239.453868	240.2633604	239.0826222	235.684959
290.5298808	250.5538459	247.3311641	250.2794433	253.1356074	241.3570343	249.7501928	233.5000965	224.1564114	226.2328853
271.8192932	237.8117289	234.6498542	238.4654785	239.3446733	243.8277143	220.8636206	222.6668325	228.3350797	219.1252039
266.4271802	223.3654231	225.6593544	230.6388009	225.412819	232.6077435	226.208749	218.0793774	217.9285906	219.115096
279.5626843	242.6999899	225.4780792	233.1779876	233.2174502	222.8885346	228.7714852	229.5983422	231.843437	229.625715
257.672079	217.0156339	209.5028255	214.4397663	214.7342986	216.1387707	210.8840483	198.4984026	202.039452	174.8723035
285.7919658	257.620923	236.1547498	241.3879266	246.6353433	241.2015636	224.6266424	239.1243372	233.0347815	223.9782502
281.860205	256.5423049	255.6549008	261.5700253	263.4112052	259.8500101	271.5586578	267.1454314	270.5481096	270.9504276
298.2549086	270.0131698	271.386464	265.0432548	269.5146535	264.1553767	272.8091189	255.1196419	253.7620386	255.27281
273.2854641	243.804169	246.3712866	241.4526704	238.7398477	244.2737393	244.9811149	229.1696948	231.3741612	233.5962036
285.0856534	255.5563524	261.8726882	265.6409045	262.5768089	264.9962114	268.4728265	262.7136129	265.2758407	261.5487307
287.05706	252.2956717	248.3508036	250.8156556	247.4146352	233.5645315	251.8487479	227.4074491	217.9660367	226.376887
286.3085014	257.4752179	254.6076345	250.7278558	249.0194465	240.9300267	232.9088678	237.6470932	237.8409366	241.0368064
274.696171	229.1453758	217.4100319	213.4493565	226.713982	224.5664993	232.0905814	228.8557205	234.1566329	233.9733648
280.191242	278.50144	272.5646018	271.0094339	274.0813193	277.2704127	274.485195	272.812239	270.9878241	276.677429
263.4179014	245.003815	240.1098561	236.6898176	234.0162477	234.6312863	228.7242879	231.0372043	222.8487731	222.7194734
278.8713035	236.1825032	232.0820427	243.8534513	250.6867229	258.5493959	233.9139095	240.591017	245.3817377	245.9163842
272.2561387	247.9955294	220.9963917	222.4809091	229.0144108	234.7910248	229.701315	220.1227725	221.8873485	216.485464
308.461072	276.6766611	258.536544	258.7849867	266.9855711	265.9933318	251.3038586	243.4863575	229.1763138	244.9054637
282.0955583	253.9792262	248.1376167	255.2776111	253.476121	259.7843943	255.1594492	249.5091548	246.1054226	247.4795028
284.1434652	274.942534	282.4832533	277.3506995	272.3018868	260.381063	266.4402518	252.6544581	257.0093285	237.6003854
259.363259	228.565579	223.0241849	216.1613925	221.1571495	208.6460939	224.8365717	216.3224439	221.3766137	217.2869354
270.5181945	248.4647643	248.6544816	242.0313513	240.1991358	243.0545447	230.7618609	234.7682167	235.7049337	235.5846543
302.2860332	263.4304975	255.9287959	248.7335892	248.9426431	245.2973881	252.0063736	233.3094075	234.8873397	234.3834063
283.7685282	264.4794221	266.420866	267.0551897	264.4013	251.2009938	237.9411512	252.9293327	242.8198961	244.4498272
260.1282364	255.3635977	253.9249883	255.2980061	250.0281483	245.0735371	252.0163729	231.7571167	232.1224131	222.8704145
260.3524311	234.6800291	234.0159581	232.9041835	232.187634	231.5589117	215.2758148	219.2911358	219.1745732	215.3549146
253.7871255	234.1691202	226.1989688	226.1269977	223.5392715	217.3157713	223.7803938	227.023162	225.1940541	232.2955881
248.9081545	217.7088993	218.9020058	218.8460377	213.750984	219.474033	218.0409921	217.6537169	217.1580555	218.2635784
281.6501083	243.0251186	242.6380189	240.3300433	242.5572588	240.9570475	240.7811594	236.9737149	225.9388557	231.5248333
253.7871255	234.6425577	229.8861769	226.2722617	223.4175244	223.5643011	221.2978408	218.499244	224.4920535	221.1175956
285.5542905	249.8207315	248.378938	245.7110356	247.8042083	238.1919584	242.1685949	236.9834085	238.1536799	236.7473761
289.9813514	252.937739	244.666855	246.2660008	252.3861818	248.1433093	251.3644878	246.3563994	251.6752118	250.850119
270.7346275	272.9851952	279.9529852	274.4994338	271.6152708	268.0317962	276.0046055	270.1277356	271.4547083	273.9470063
266.4348421	233.4358447	224.1153793	221.1028187	225.3198483	232.5392525	226.3769807	234.5381387	235.1472278	236.0338489
285.976935	256.5647147	236.504834	244.5065985	252.59576	251.7507811	258.5247206	251.0513965	255.8841129	249.6724206
283.8329366	258.8387444	256.2667212	253.6061853	249.5188367	254.2175368	246.2011791	234.1739151	238.1984247	230.37608
293.955554	271.8736299	259.4632631	267.9103013	268.1319117	257.6553605	267.102769	256.8318816	254.1353429	248.6452985
270.5975348	227.2343894	208.2646417	211.8312181	220.2337816	221.1192171	227.949846	219.4553599	216.1896221	214.7030387
270.2982041	235.3427165	240.3197833	238.0242941	236.1617645	231.2420398	225.5723867	217.645557	220.6220212	220.2061836
272.4205703	238.0824095	229.4552738	231.1704856	229.5716502	227.7440109	228.8821525	228.2555648	212.4938099	225.9560624
281.789958	260.4618116	248.397944	247.8583367	248.7055747	247.5260689	244.3038238	234.669958	234.9894497	238.0161359
289.99147	273.8162302	274.7100265	272.8780892	269.6175282	268.0952346	262.5899321	260.8330992	260.4161672	261.6117811
278.6495597	252.388569	255.1324239	250.2310003	248.3654644	250.44844	243.5505775	240.4262884	246.0198067	241.6918606
280.7469302	250.7977252	238.1543021	232.5607044	242.9373452	246.3868792	249.1760809	238.1684063	243.0055812	241.8327911
273.095172	255.0223926	255.8874952	264.0572467	260.4570226	258.8075553	269.1437443	259.354098	258.3182413	260.899983
284.6273168	252.1997589	257.0161277	263.8669584	259.3250179	263.8658822	254.717462	250.7995067	229.2007652	248.0358832
300.4052563	276.8177631	272.7918183	267.7226913	273.6162992	276.0068376	275.3573664	261.1352716	262.848619	265.2655995
281.6501083	261.1489804	257.2393064	254.842387	257.2399123	255.1428647	259.9227356	253.5695081	256.9555817	252.2216457
277.1737106	263.3811476	264.4989227	260.0700177	257.579856	257.1706278	254.7864858	246.7514684	251.3388027	252.5154702
273.3782129	255.0622595	253.1595584	253.7246081	254.2065305	255.8423247	255.7623695	247.8361261	253.1416007	250.5493751
284.5103326	244.7664211	244.4831442	238.514237	239.5399861	233.0078145	229.9032788	225.924284	225.3114276	227.9747071
293.774949	262.9283831	252.8785505	255.9998192	254.8504837	246.9227518	232.3228903	228.9009211	228.3399986	230.9876977
296.9392116	266.3258171	252.4802195	273.5941427	283.1384559	279.5481904	289.8727828	281.6458123	279.3739491	267.7148849
295.6346063	278.6389761	284.5888705	283.0503089	280.0091461	276.8805883	280.5764712	273.794293	277.3812958	272.0918713
274.3620532	249.5705662	247.1933015	244.9682159	241.7473712	248.3694101	244.7729256	240.5730224	232.4981422	237.6210239
267.2769529	232.7914308	233.6276499	239.2428703	234.2032198	219.6123103	211.9099035	210.2609405	209.7390898	215.9432743
278.1385264	234.5260038	241.5902915	241.1192759	238.3564178	238.3029457	239.6235954	236.6632777	233.3781595	238.3234769
292.6197169	257.2264357	246.3897338	244.3651313	248.6840287	243.9738862	250.2922128	245.8873491	250.8482778	247.856471
279.9692482	247.1578228	243.4171646	240.2488873	238.680463	242.7861761	243.6086909	236.0512473	239.8547336	237.7257651
278.6495597	239.7886712	218.3304573	226.5329258	223.557692	223.6914558	210.5181197	203.1096305	199.231558	201.7561944
258.9249248	237.3291748	243.9579687	236.9500731	232.8598809	231.4897964	229.7286666	226.488455	226.3530358	229.2791455
283.466215	260.4143254	266.4903792	261.4848893	259.1280125	247.3545033	253.592518	233.0307147	229.6882731	231.6941387
262.8248449	216.1182547	222.3600773	216.494306	212.9064937	213.6358073	203.9061928	188.4183444	191.2881644	192.7426727
282.6449111	268.06297	247.0928313	248.8128305	252.7794138	257.9899723	257.6719735	251.9229601	253.8917607	256.1556395
285.0856534	258.2495165	240.6093689	261.972583	267.5488828	267.6643512	264.6098086	267.4151108	267.3298141	267.5864529
286.7630042	276.9213338	274.9721437	267.8073112	272.1557682	264.3277743	252.8944338	228.470871	233.7142177	224.6941719
273.3713174	254.7601535	253.7160999	250.8208514	248.4506203	247.8270596	246.8582527	240.6346152	242.5536329	242.1117526
258.9871033	239.9615044	237.9777544	245.9522449	244.0046638	248.7567066	247.7976226	247.7245917	244.7166006	244.4400814
262.2846037	243.7976648	239.94093	235.0734637	232.6360791	233.436396	232.9773992	233.3001801	233.0945349	231.8053153
273.9542295	228.8433963	226.7195421	222.3003943	222.5067775	217.7098521	224.1947063	215.3578316	218.5783415	211.4525804
296.7096159	273.8720427	270.5820125	271.2725541	274.2729164	259.2306408	257.6665629	252.3554496	258.0591333	237.0028509
285.9335645	245.0042425	239.7524482	247.3488516	247.7116321	237.0692393	242.6809526	230.674549	228.7423256	235.7296357
290.2201313	259.1757528	252.453677	247.2179573	251.885541	248.9145127	254.3156947	250.9742781	250.8423165	252.6877133
273.9542296	233.4191854	229.9583452	227.6893097	233.2606169	215.5030607	217.9537413	213.4630783	191.6799485	206.1734214
279.4121705	275.0826771	273.3274898	267.2928885	271.5928802	264.7735336	272.6757556	262.6033519	265.9167503	262.6667459
300.6359021	263.3759484	255.4407278	251.8766283	254.97406	233.3255184	250.5845105	245.2944712	249.6028979	241.911591
280.5255757	250.6599285	229.6774921	237.7327314	238.552548	223.9120701	236.9156815	229.6778285	233.9371239	233.6030328
267.9018903	245.977481	238.4139873	247.2680276	246.3090963	249.9338143	248.4943185	243.9334081	246.3671013	242.0273523
301.2902649	294.9253207	292.9578165	299.9854252	299.5238873	299.1905242	304.8956694	291.4509739	292.0364762	285.4591655
271.5003218	258.8201398	250.9530387	246.1123845	244.5765579	240.1641305	241.5601813	231.5569222	227.708655	232.9001656
283.0938363	256.0637499	245.8683066	239.9789822	244.4180585	250.4286688	250.2407534	236.8644919	240.8832972	241.5036296
304.8267188	263.7111296	258.6285611	253.2744225	256.2230386	251.3101068	257.3496336	252.9070173	251.1729264	255.4586908
263.6286521	234.9951859	233.9669989	226.0860134	224.3018458	217.7427523	212.5745506	211.7386746	210.8068074	205.6902027
275.347075	257.4975146	258.7701319	252.1118054	248.057092	249.8966217	243.8384943	249.0710276	253.1254385	254.5044298
285.976935	266.3331371	262.2621766	263.4937173	262.1117087	255.0722068	259.1746357	253.4613499	253.6955237	254.8173358
279.3909928	236.0192638	216.5132411	229.0807852	236.1806444	239.262591	228.3471991	213.5916546	218.0684805	218.168507
272.6802869	253.2221101	251.2351205	243.5298198	244.9301204	239.7069803	243.4599775	241.2399037	247.2115297	244.8812308
278.9548116	263.3239956	256.6088951	257.6740359	258.8958883	256.4413453	263.5151323	257.3479331	254.2847047	250.8406129
261.0719546	227.4613889	211.3744926	217.0884591	216.9017124	223.2902076	224.5435335	218.0815412	216.9451014	220.989839
273.3713174	249.6478013	231.8950712	239.0289511	238.234658	239.3637969	242.9961456	224.2999719	228.5819707	226.5434043
268.0578345	255.3209888	257.1553108	254.6201264	251.859095	251.9671452	254.7397307	242.1620323	245.4317494	247.1156557
264.403274	240.5137203	240.5272008	254.3914719	250.4354793	254.9544205	250.2259989	248.2694108	246.5831534	246.2411131
284.1434652	256.4003652	257.2769127	248.7521592	248.2009823	237.5299839	243.9651577	237.2902689	239.3096659	242.2555079
267.9718123	242.6397885	243.5091613	245.4414585	243.1530203	243.234996	248.1793371	241.1455108	245.863572	239.5032249
285.7523938	242.1773671	236.8192944	239.2335777	241.0788115	241.2783246	226.3547964	237.4577222	242.7479818	238.4735241
278.0140763	268.3173684	258.5647508	253.480987	255.2423279	251.3783702	262.4784638	248.6198827	250.4082439	248.3491538
253.7871255	206.7429061	209.0372251	206.2956154	203.1587151	203.7005509	200.5271541	200.7160693	206.3666429	206.2729577
230.8732888	204.6939635	188.5483768	189.0618063	204.7107655	206.8930684	210.4628351	193.836601	198.5326856	198.8338908
312.5291705	299.0617059	296.7582986	290.435372	292.8165915	278.5019077	287.4740706	281.3583248	282.0071811	277.6889211
303.5333003	276.8501717	275.1400179	277.6584314	273.028939	268.3893766	263.9836637	252.5717995	254.8021905	257.0134209
263.5760046	244.2081163	237.254448	243.7144634	241.4187801	230.7303562	241.3353695	238.7598443	243.3724547	243.5533846
271.5641383	233.8679672	229.459415	227.8340359	224.5625874	231.7175731	220.848966	222.6406087	223.5708319	227.8077033
268.8202245	247.9698264	246.0646598	239.0640314	234.9710905	229.4327082	233.9792366	214.573413	220.0927541	219.6422294
291.9287572	277.7924909	271.5647136	275.2385414	274.8563045	267.0043662	273.8020032	269.4565463	270.3811322	265.9082702
245.9309998	204.3867017	186.596565	207.922212	202.7908981	199.1954482	207.1767159	195.9845826	190.8907099	191.1908124
272.0458448	247.1738817	248.1549742	242.0914496	243.202405	245.1433821	244.8267009	232.5930438	236.3306263	235.8637218
261.5725487	223.6359921	219.6041246	230.0538008	225.9941737	219.54732	232.4232719	216.5434697	201.6549187	221.0131015
273.2854641	242.7238837	241.2128169	236.2489691	239.2729126	247.0658843	243.0270122	229.5284272	226.4912921	234.4208471
295.1664461	274.2223575	274.884736	268.7965116	266.2038687	255.2598389	261.9203048	254.8676494	257.4274533	254.9046882
283.6515379	278.9023065	269.2520995	258.6646899	264.7769521	261.389084	259.4936242	250.3377208	255.4180194	251.917313
266.1460452	256.1092673	246.2744122	238.2355391	248.7921159	248.1900175	251.5360293	250.4560439	255.1204037	246.0907001
265.3866426	228.2503958	213.9445601	206.6137874	214.5000456	213.5341386	220.0371987	204.9564934	200.4873925	203.38447
296.8018981	243.6690628	229.7303334	225.9622975	235.4805737	231.8464174	236.7657666	236.5666877	239.9832487	235.6540828
286.1265418	259.0032288	247.1427081	254.1655708	261.1929258	253.3649032	259.6107056	249.6840706	251.3595562	251.2202339
274.7409178	262.5355383	258.4204486	259.2128608	255.4438895	255.1101515	259.5800761	254.593715	258.7881772	240.9700722
256.4358455	235.7406456	237.0450511	234.4298323	232.4104567	233.2037259	234.7992441	231.4670602	224.5989207	231.4342608
271.5641383	242.6028958	236.6962007	241.0972202	241.6450062	239.9982416	235.6080718	235.9151009	241.5422016	234.988769
267.5469484	246.0055974	246.9812205	250.0986715	246.6610625	247.8524164	250.8999287	244.9809813	238.4947137	241.6766669
261.0308593	238.9766466	224.8275004	242.4831309	245.7637847	250.2368751	249.7113471	241.228152	241.8037429	231.6881637
263.6286521	251.7837425	247.3548425	237.2756033	240.9139823	230.5982656	245.394604	241.6901865	246.0284779	241.6264763
306.2991007	281.1136283	287.7659041	283.4855613	279.625287	276.3533778	278.9914777	258.6096273	260.2911738	262.265279
269.8130171	236.8069047	231.3343853	229.2195345	233.8019019	237.0092256	229.1830342	223.8183916	227.546492	224.3139521
281.5198342	257.0136518	242.7105115	252.4037201	253.3671716	258.1944228	245.3560162	248.7539118	251.5405413	252.1150812
250.1736555	229.8896695	228.3328238	227.6216579	223.852239	233.0554639	231.4005746	231.4888815	235.5825326	237.0510403
294.6283329	266.2886386	262.136644	260.4118136	261.8555721	263.6830953	257.6988302	250.7576333	253.1602006	254.5713461
284.250108	260.0448474	253.189154	255.5400135	251.3261492	248.4450418	257.3907442	250.5890412	248.9792945	254.5048223
265.8864889	256.1360867	257.3703389	250.832755	253.5501898	252.8600331	256.4573749	244.9077724	245.2291116	242.6668198
259.7598663	244.0055633	225.9093259	237.0253632	234.704096	240.4909227	241.8782365	240.9519214	242.4376247	242.489932
306.0888617	274.5661727	270.4505493	261.9899537	269.0252375	262.467824	241.7058927	234.3023908	221.0767152	231.0835996
274.9063986	270.9896709	273.8644669	268.3485411	264.8225773	267.2315061	258.7488408	261.1443167	260.5781472	259.0608519
261.3059016	248.3368896	239.1179923	232.9782902	227.0654172	237.1298045	223.5641129	229.250071	227.3670264	232.7387212
280.0014012	261.3605233	260.9987163	271.3739541	268.4979306	272.2601571	255.1864266	261.2613953	238.6345162	256.6554978
295.3045366	272.8636234	266.6083144	263.7076551	268.4376972	259.0377613	273.5873338	254.400195	259.435645	256.6203773
299.2461496	255.23766	248.927285	242.4174952	245.4530715	240.7892971	249.9722748	233.2237565	232.8959955	234.800684
276.6142557	228.6977793	215.5466901	227.9832005	227.1462474	222.6242499	231.2035633	219.9111191	218.9798092	214.900419
287.9168714	259.5332923	249.5764785	255.9864685	257.2905659	249.917302	255.6428592	240.2976934	243.7731061	237.5894933
274.6665771	237.3619332	210.4925094	221.5458822	218.1747469	216.673606	222.3106535	219.1775843	217.8700104	224.5686331
248.5477638	242.1629554	249.6536416	244.0486531	239.6392875	232.0072687	238.2533633	238.9928488	237.0117622	233.6860328
256.232691	240.6230678	233.8294689	237.3256064	233.3749897	220.0546334	235.5289454	239.3235882	227.7278422	220.42315
264.262698	234.3153786	223.2653973	234.2534467	234.5255597	234.5653611	224.5901519	225.9609634	228.6935987	229.1340305
283.6283606	253.001625	248.4487879	257.2941749	257.3484803	258.812367	243.8589537	242.3259526	246.5075175	238.2299658
248.9081545	212.8298504	205.9166546	209.0951924	204.4490497	211.6261999	209.019422	213.5222439	214.0679558	215.9366516
279.5702146	261.2793199	248.1167736	239.8588793	254.1361651	252.3278567	258.0872867	253.248536	250.7689829	255.7797306
277.9550341	262.994323	264.9891811	264.6900561	266.27535	261.8351182	263.8077923	247.7031627	245.5227593	250.764389
284.5749702	259.0756188	259.4935538	257.4823462	257.7269277	245.5496317	258.56358	247.142431	252.9386051	246.560738
275.2736702	247.3089146	246.2133071	245.3001608	245.1794169	243.366753	250.0698507	241.6412167	231.7254839	239.3969549
272.5111123	229.3621332	231.9081453	238.387636	240.0825915	231.785324	239.3916385	226.4336334	228.5291263	229.9313689
263.5048035	233.0388981	238.0142757	233.2557708	230.0212121	231.4669327	236.117493	230.2696835	234.5672065	235.4109742
289.7884432	274.8951527	275.6258915	271.9653038	274.2963321	272.8912289	272.37729	263.9977591	266.5369719	261.9576792
295.1664461	263.8073518	252.8250017	246.3636802	252.7190334	244.7277984	252.8998293	232.5390878	237.5294998	227.4332844
271.0899254	240.8999103	237.2363991	233.5399599	234.8884128	236.4630872	230.1466123	235.5874664	240.6547402	238.1698025
279.5094007	253.691562	253.1028169	253.218863	247.7566202	244.1274664	240.6388434	214.2470652	211.4859259	216.6847456
289.07301	268.7882278	252.0514359	263.8546886	261.1238689	254.4675386	258.4225233	259.9616096	260.3406314	263.9129988
283.0190591	268.6275044	261.4227817	259.7624276	257.3458612	256.3991189	261.9480752	254.0393949	256.3415486	255.6790356
294.937112	251.7276839	235.420827	247.74185	247.7206173	243.0985623	231.539817	228.6716232	233.4714801	229.0321509
239.2427839	208.2089592	210.5789844	205.4707424	199.9061074	204.119297	209.4926932	210.0811632	214.725577	213.2572241
275.347075	253.3270871	255.0351088	251.8256947	250.7029726	249.2942841	252.6168842	251.9299876	249.996704	256.7119796
272.0458448	237.2530429	239.6983395	236.3941915	234.5979961	228.4182322	235.7163341	219.3004782	215.6052163	211.5546118
271.3229223	257.8437418	260.1821345	251.912768	249.3882154	248.1517173	253.2181829	242.12643	246.1397197	245.3950925
302.5484014	273.9843703	266.1413355	260.8377725	259.4134244	250.9411149	249.8604774	249.128372	254.0196392	252.0186275
293.31746	260.5147406	259.8506283	250.4350536	250.9273472	249.5747493	242.4293645	244.9216714	243.5180813	246.3028176
296.2992753	264.2899922	261.7685534	253.6917918	259.9473651	250.2391602	256.6310072	249.0238202	253.1846371	253.1111584
285.0778234	267.7218201	255.6156252	260.9534296	259.7948301	261.7462242	254.411167	247.9323005	238.403931	244.7735236
256.4358455	224.9849448	229.1703878	232.90956	228.8600652	233.1559686	239.009949	231.0462573	230.8997257	235.3342333
273.9799783	252.3776623	233.5383181	232.9098694	243.3165053	238.4295069	245.7807209	248.3599945	251.8391268	245.5971764
254.9111137	223.1787747	209.5550918	215.7812063	220.8996938	227.5373211	225.3458473	221.4705058	225.815373	224.6414912
291.8264037	262.6061447	257.309979	254.1464275	261.8335821	261.2749662	268.5078903	262.3096484	258.3485366	263.7421657
281.3734906	259.6318362	264.1666618	266.7174072	261.7889177	259.7608253	256.5686366	261.0558607	260.9135512	256.5193544
248.8513618	226.9778311	225.8409149	228.1549475	226.7835371	232.3007478	234.6484243	228.296329	225.4199051	227.1227162
263.4179014	237.5081613	240.3124287	239.7365169	236.4087224	229.8426711	236.1339559	231.6551638	236.3892027	237.5316003
280.3050061	241.5647609	235.8201234	232.352384	236.1317637	231.0239294	242.9770596	221.601069	223.8937856	219.3226133
301.1191792	273.7917503	269.9722391	269.9308076	273.5937553	269.6639638	281.5749292	271.5580262	274.9015015	270.6758311
274.245299	236.3385048	236.9021135	237.8935355	236.5276725	231.7772141	231.398813	229.4964827	230.359668	225.6814624
276.3005897	240.708184	239.1593288	234.3106472	235.4738143	232.8661811	239.9607627	229.3499812	231.0019851	229.9799083
271.3243225	252.489169	237.5540649	244.924166	246.9732425	243.6020358	251.8359016	244.6386687	246.2488	249.7384947
275.7831982	247.481172	243.3452207	240.4617419	242.8523372	247.8316648	228.9918544	207.0353293	205.630246	209.5829424
270.9629726	249.4878023	252.0081464	246.5380337	242.9237574	233.9726253	228.8040336	217.1039784	203.7933525	217.2625516
298.0218036	282.8449269	272.847033	266.6433234	274.6645946	265.8273834	279.0793302	268.1805519	273.7903607	272.0858012
300.4998047	276.7887403	261.6839289	273.8252483	279.3647086	269.8643319	279.8206059	266.3685962	262.1212106	263.1779748
277.6925306	249.9603615	237.4100689	249.5925287	247.6212401	248.9546656	246.1433255	223.2356881	225.8400539	225.435207
266.7954857	244.2449789	240.9795273	239.5443547	242.6462599	230.180781	250.0666327	242.4683129	248.0367927	245.3663846
267.0504075	245.5330005	246.9458809	243.9944123	238.679125	240.3479058	238.6128177	233.712249	237.0838505	235.7500822
294.6193532	274.4304677	263.0303189	264.6134528	261.0243714	261.1889523	251.1241387	249.5882109	251.2610946	249.1877591
280.3907684	262.6244859	261.5610419	263.7826478	258.8249865	255.5327564	254.7399325	237.7383006	238.1797272	235.5278059
294.7040075	262.9958498	265.2774127	268.8912814	265.249742	267.7815885	267.1572848	257.6480006	261.3422629	258.7545734
283.7685282	272.5851647	277.1634301	273.8477583	270.2345874	257.2001835	267.8981628	262.6886444	260.4796778	252.8955107
253.2247395	255.9009361	250.7134054	257.2715066	252.3318912	247.2884552	256.5435608	246.009811	237.1463016	243.8708278
263.5760046	248.2224107	243.6819506	238.3800559	238.606698	238.3105269	231.9875405	233.8126948	234.0991002	235.4360529
275.5405587	248.1079845	239.6193911	234.7334821	239.2957503	238.2119472	240.420743	232.7445671	233.3947368	232.6275976
280.3907684	239.3759343	247.5035823	244.368849	239.1560176	238.1003406	239.6943727	227.7334091	232.3525204	218.9519425
263.7188921	209.4031123	204.8351488	206.4998086	201.905782	208.0490483	212.6416789	199.4523937	200.3720061	196.729895
265.3502896	238.5055888	246.4364611	239.0453595	234.5010857	239.108782	238.9607717	237.5548983	241.7103012	240.1599847
262.3315494	227.6192657	227.3973513	221.5756009	223.9916208	228.4562072	232.7453807	223.7209748	219.3051093	218.3547635
276.9551776	244.5399173	239.1048691	239.3360451	239.689041	238.306557	227.2313616	230.5437201	228.1836774	228.2898294
282.0890326	270.8274486	261.0045738	253.2824746	252.8459158	251.3299037	258.7276727	252.0647762	256.9906721	254.848582
262.9216386	241.8603151	244.9027558	246.1022629	241.1719534	234.7556388	245.4083349	237.1720068	224.2480196	233.0016613
295.1036842	281.5357881	274.6218538	265.9876023	271.9357078	272.7740975	267.6467154	254.8837524	252.6077761	246.8633877
269.4339066	221.8659922	201.5262086	211.7235973	228.799391	225.6534777	203.3790848	203.0772263	200.5718298	204.6968679
266.6512752	259.586613	261.7915647	256.8836209	251.9420881	255.0845835	251.3430413	248.7684798	246.9016721	248.2765319
275.5515722	251.2812327	254.0782388	252.527729	251.5547121	250.0975865	255.9908232	249.7333022	252.1767334	251.209474
260.081998	244.3152236	236.2201168	242.1414947	243.2526289	243.7960523	251.864944	252.2284931	252.4061083	251.9447278
256.7607988	252.5674293	261.0452868	262.2958229	257.9887177	264.6055349	262.3491798	261.8086688	266.9110703	267.3864215
279.40088	246.5553571	242.1891425	247.4649589	252.4318318	254.3488668	251.7877089	245.7401707	248.4169916	250.863902
246.7721049	209.0865296	194.8673369	197.434001	203.5490648	209.4164815	202.6526215	192.0287753	191.3612154	191.1783247
274.2442657	236.0317108	230.2279859	235.7540696	231.4461215	234.1626021	213.7211196	216.2270537	210.8911588	214.789254
276.8024359	240.2640906	240.2591022	235.0540821	236.5497215	239.0601074	224.8890532	224.0169084	224.645482	223.9429311
256.3398623	227.5134597	220.2823675	224.0140252	238.1014759	240.207389	239.4286305	247.4788086	253.107972	247.3343125
242.478815	197.9101945	199.2644781	211.1769119	210.4671528	217.616991	213.2027284	211.6904175	203.6991119	211.3930373
298.1565399	246.7892558	234.7134637	248.6941751	251.4559531	241.9882191	251.7197502	240.7569404	242.263808	242.6128323
270.9629726	231.4980478	235.1028797	235.2945765	236.9424114	233.2729545	225.6510448	223.8540418	229.4375472	224.6649019
265.151846	238.6199422	235.5802679	229.0303135	227.7457813	233.0966986	233.7515114	236.7815031	233.1425329	231.6054709
281.8665536	229.5922187	211.8974275	219.8054747	218.7863868	223.1790489	219.1515979	208.1459327	202.6422056	210.4249173
280.191242	256.3971948	263.0792905	262.5940763	260.2993659	255.8799189	246.4624617	244.6601786	238.2743621	241.6842578
285.0778234	269.9379655	264.4560629	266.1193697	265.5459639	263.4261265	269.4980522	256.0907197	255.3727754	241.549416
265.3505543	251.0809031	249.8756741	245.356015	248.74242	249.6496767	234.1922228	236.1735515	234.0967118	225.0450358
264.5706626	246.7391389	247.9843294	257.1529158	257.3798505	262.4097737	245.4704103	242.2324213	242.088286	236.2491245
286.9822828	255.9030809	245.8322601	239.4585328	251.0599023	242.9902532	253.7609109	239.8822404	244.2559425	233.2939592
298.8574455	286.2310141	273.783241	265.8741044	271.2028073	270.1470164	279.0078475	262.3994117	265.6520634	260.0030193
272.3652597	246.6122927	248.5812148	244.0843169	242.5575976	242.5821272	246.7950912	242.9047306	247.3572565	227.0056472
267.2543858	238.8730935	240.8565843	234.013516	230.8172205	220.2540606	215.2106584	186.1924741	191.8904675	190.8285067
284.6186726	270.3792579	265.5612625	260.167842	256.1389114	259.8888556	253.2006024	259.129552	258.3961607	252.128914
282.8724664	249.2908774	236.623263	239.8610453	241.2238225	230.4658546	230.5381242	223.8328528	211.5226624	223.1476504
279.9692482	256.6299358	256.6015341	250.530185	247.1387913	250.4239194	254.2053375	245.2046975	242.8572191	248.310152
292.5420348	278.2714535	277.8490161	270.8397226	269.731787	264.6796694	268.9439268	258.9839743	251.0835713	261.1717241
277.5453907	260.813311	262.7197848	257.5156427	254.0901813	247.8530282	244.292794	251.2619987	247.9255769	252.9419087
275.347075	241.5356785	243.9865448	237.7830375	236.8105356	237.8747054	244.6358735	239.8551141	241.4660703	243.2268312
269.2529499	232.5882279	230.5603983	233.5057622	234.2876151	237.3462438	219.7016784	217.9274328	217.4636678	223.4457022
282.6449111	263.9244564	265.9191329	258.4885046	257.0599142	258.3420042	260.8600725	254.1120065	257.5788255	256.3076418
274.245299	247.5572019	251.4601374	245.9587014	244.5086466	241.2053002	241.1160335	241.7302363	245.222299	240.9046109
257.3987162	228.6244446	228.2397644	223.7507312	219.1681138	220.6196752	227.7137946	213.135386	214.0687868	212.836814
290.709769	253.3209834	239.2172378	244.3244191	255.9108307	259.8773991	260.4096825	252.2350793	256.3969297	257.8567799
261.7427472	222.818588	217.5702083	218.381438	217.3377106	218.0928656	218.2115347	218.4831032	219.7955563	220.0989394
296.5687931	263.1710089	265.3236378	265.7814389	261.9970026	256.3710432	263.6886323	256.4821483	262.1987368	258.1939532
271.5900195	236.7593051	216.793023	224.5679199	228.0689688	231.8067481	231.7336338	223.0865911	228.6913318	228.4857358
293.4370733	252.9649625	251.5664101	269.3583208	265.8389612	270.1217158	267.4995144	260.4411712	259.5504886	264.2558508
279.9186506	245.2600227	241.5651337	235.4565	239.0920835	236.0316502	242.7929882	230.6564499	232.083636	225.5432351
274.9558017	254.3998751	242.066177	237.092363	241.1742221	246.5091007	242.2239552	240.8373805	234.7601547	235.6468034
268.0776696	234.4371981	230.2534776	228.5695341	224.6412403	224.5874123	224.3882684	219.0932181	224.1430754	224.2330966
260.1399696	248.2485119	246.7093325	243.445529	238.521788	233.3882998	245.0317727	220.9674963	221.750486	218.2468175
278.7288599	245.5200832	237.7357424	247.2449947	248.1953069	238.861336	236.9277955	240.4737158	237.6242823	240.1787545
272.4950046	250.9412842	234.5178021	235.1421209	243.7279593	250.7443748	243.1098974	233.4312292	225.2910367	236.2175925
289.1457755	232.5387889	225.7954311	227.4991347	225.0453979	224.6807694	214.6803492	215.6806743	216.3110448	221.4699892
265.3502896	259.5316666	261.722467	255.1343164	253.6110992	238.1894275	237.1140102	239.8418207	239.9549954	237.3748284
287.3942628	251.903451	254.3359972	248.3625423	245.8761276	247.0888633	252.7154826	241.5825554	244.4981764	240.3703688
269.1808681	249.5698468	244.8973832	239.4452332	236.7989087	231.1403038	233.5434319	230.8441481	236.7380152	234.1302568
279.7582644	268.1400489	262.9799687	259.2118679	258.2632965	258.2179626	254.8736529	254.6049969	257.4241473	245.7840281
280.0014012	251.1598436	253.3888003	257.4070943	252.6454831	248.7336442	250.5044723	249.230482	250.5331658	253.3060657
272.4950046	249.3630578	245.9701058	240.2843668	238.7925208	242.5706866	245.2544848	238.7331219	240.9634323	238.4177583
275.2494891	252.8343608	258.0756046	253.6938244	251.5986598	242.1306106	210.6823101	222.598484	227.9880644	224.5192484
276.6591829	265.405243	257.8344251	257.4770604	265.0830624	258.6247455	262.8501754	258.8069732	260.1493134	261.0477689
274.696171	251.5818093	251.1353058	254.596514	254.0103887	260.000337	259.5567736	257.5526238	262.3516724	263.0400865
292.5065102	265.6427867	263.6339379	267.030817	262.9184487	251.7683824	262.3645694	257.9227582	251.6889612	249.8137908
270.5181945	253.4095772	256.3253746	247.370927	244.2974343	242.9637284	236.2795295	234.2086561	237.1534383	238.0403181
291.6973687	258.4728701	258.3712795	258.9643904	257.3109763	255.6788679	258.5598729	253.2383257	256.3999931	247.722572
290.1439293	265.697917	260.3169522	266.0410005	264.2776418	258.0314018	263.6717033	261.4438922	265.8124029	263.9180141
254.4907098	241.6377946	241.2469896	234.8255345	234.1083055	230.1058583	231.6030931	218.4123676	217.8556568	209.5110977
257.746641	229.9606315	230.6339731	227.3343606	228.3853141	230.0320487	235.8493292	227.2772395	229.4644415	229.6683726
252.9610684	232.1230843	223.5982057	215.8127645	224.6776738	231.4914292	231.9520663	222.0933358	226.7765935	223.7660237
266.1594608	240.4078635	245.2267867	238.3032558	234.494212	238.2921869	228.2826673	224.2837366	219.4266837	227.8039065
280.2316013	260.0819845	262.6760913	259.435389	257.5680242	252.7311595	246.5126346	247.2712447	246.2918957	244.8040805
267.003898	245.5448407	240.5779574	236.1271215	232.4383631	228.6168113	217.8680129	213.2601192	216.7606636	215.430723
270.5288316	243.2485378	237.9925573	243.4270335	244.4554952	246.6080839	235.3690109	231.4468581	234.0229718	235.3401202
281.3904776	250.1229725	249.3951805	242.663336	243.7959322	246.1806898	243.7962559	233.1222787	231.3265834	236.6094053
294.0537528	270.1723287	270.1909929	267.9422811	271.7805324	270.5281325	243.2721023	243.2940987	246.7384019	247.5307791
276.8096926	243.5260463	243.9731515	249.7624823	249.7376877	244.2457069	228.2107219	225.8583164	226.0339933	221.5599164
282.3452778	258.1626598	259.7273305	263.5026052	264.0601644	267.1811183	263.6733837	260.8099485	263.5091479	258.4747091
291.2726901	231.4671946	222.5113727	217.0718949	218.3456271	213.2784107	197.6850107	191.8944497	194.3923991	196.8364362
275.8264231	221.9004397	220.8716346	220.2234267	216.0272543	216.7329101	197.2244602	197.3557358	194.4683827	202.0141695
247.9875943	221.2548793	216.1458233	211.7799659	225.1548387	231.5868643	229.4952269	228.0012639	233.4891319	227.4517735
254.7842795	232.6408978	233.6533604	225.5448769	224.8791013	232.7566936	228.8980293	231.0113645	222.131112	226.3068899
275.8489934	246.7351181	248.7578792	244.7825724	241.6967699	241.9234671	244.2646165	230.4057327	229.9064834	229.5909611
289.5553382	253.0369318	239.1496653	242.9825273	239.9373097	231.3339242	228.1297291	221.0048899	212.5387911	222.1414285
289.0832809	262.7470983	244.5891905	241.3563937	252.3774181	253.1379101	253.1198634	241.1143091	241.6484238	239.203642
267.691606	249.3087037	248.9368336	255.3461793	251.6937389	247.6393312	249.4939081	248.6402182	252.9410846	241.5346623
283.0938363	242.0810017	237.0114816	229.6966095	237.4971111	238.1615256	236.4116527	229.8649708	232.4880249	229.6681915
265.8659793	252.8202782	250.7630508	250.792148	246.4806122	243.837423	251.3783297	244.4199484	247.0351066	246.1887693
283.4982511	241.0659241	243.5147618	240.1460054	238.1879654	229.7063558	233.819164	227.0733495	231.5336568	231.8814369
297.0568964	258.6009755	253.6215107	250.1690729	254.6798537	258.1841038	254.7600837	254.5348698	255.6416253	258.2969281
275.7546232	256.2018926	263.3988716	258.0602948	255.1006159	255.79653	259.0976948	247.2090372	250.7850146	250.1254541
282.3452778	224.4222861	228.5424544	243.1194275	244.2121792	245.268994	246.1469458	240.2306751	234.3482877	241.2693285
246.3661254	220.8520224	217.2358843	209.2027014	209.976365	215.4055754	206.4928689	202.9143296	205.3068117	205.2274593
260.376415	242.672597	235.6130918	231.1284004	228.3202766	236.7576732	221.2924324	226.3934626	230.5558404	229.9255158
296.0296285	271.0298256	253.5102836	244.9548192	253.7034268	256.1882932	256.8306499	247.491742	244.3283583	245.3621853
262.6430764	229.5032487	213.8427033	218.7775189	220.5811749	228.5436593	223.2846166	218.4499661	215.5567173	215.9752122
276.9852747	232.652224	229.9723955	226.3545256	225.6833255	221.6917127	205.1118864	183.9905016	188.0998774	178.9432755
270.6149653	253.6481589	250.7279887	252.186395	249.865523	250.6956685	253.0353107	249.3380437	247.3026136	252.8915868
281.7899579	236.5366118	226.1996367	224.3888635	226.7180644	219.672615	228.5194889	217.517867	208.8831292	217.4654669
271.8192931	262.8165594	269.3868036	263.3584858	258.5167091	255.5640543	267.0991453	253.5004874	254.0840979	254.8511933
282.8694523	251.0018738	247.4167683	256.4011452	255.0112261	256.5374607	258.8768632	257.0683729	259.4088485	258.6757793
307.2036822	279.5471744	275.2390513	270.8794609	274.3525203	276.2229106	267.005861	266.4960516	270.1766872	258.5295153
254.4211358	221.9125167	218.9967348	213.4279125	221.7493494	222.461985	206.4524729	206.2392352	212.012211	210.1524051
272.5674294	232.6092011	228.0230696	223.7248516	232.2967382	227.8150957	227.1869077	229.3850147	233.0737205	233.1409282
277.1737106	259.1047409	264.812155	259.0909822	260.1768186	249.901338	244.0995163	241.1140088	245.1778114	241.5890387
270.9509198	245.7759328	251.3855959	250.8748396	247.1065665	227.4500338	249.8197219	224.5457316	220.777131	220.4786605
298.0218036	259.6493424	262.3930573	257.5212421	258.4587114	258.2697025	249.2964971	240.4646053	245.7336607	239.9382143
266.8479249	255.539268	252.4776923	243.8271802	246.6551051	247.6362486	251.9287285	234.8934688	233.1208182	239.7449756
280.3023849	245.3240448	250.0806675	254.5951939	250.6462278	238.2064827	259.2628385	246.7957858	249.4546379	251.4751238
266.9629096	269.7649348	259.3003755	252.8737055	255.0631353	261.533157	256.241725	253.0073766	240.5339917	249.4934164
277.8345321	252.2486071	250.4833422	262.7187068	261.6952939	266.7099064	263.218264	242.0090065	239.904674	238.7904863
283.7626808	256.4355182	246.7337424	246.0789487	256.4950649	251.7761603	259.0705561	244.1257605	248.0834404	243.8588581
257.9655107	214.9773518	215.9252279	223.1184729	223.8526329	228.9128417	217.2381918	216.6282854	220.5003672	212.3136525
272.4950046	222.4604367	228.9947606	234.8874675	230.283507	223.4681051	212.2948991	212.6040037	216.9254564	210.7376099
295.6825958	258.3244304	261.0981004	270.8521973	267.1885518	257.1729168	261.73512	241.3310298	247.2872698	236.3869713
277.3939744	264.8438521	257.8725687	262.4491094	260.3332114	259.8119051	257.7545534	251.4204216	249.568625	247.5171881
280.4960648	260.0676207	254.3058947	245.5765572	245.6903546	244.4081242	243.8551742	237.9524228	241.9630794	243.463816
288.5703653	251.8612544	246.2586958	246.7699263	247.2692721	250.5319216	245.8205939	240.8804835	244.5306169	238.3675206
291.8264037	277.3063961	278.3062757	272.2487415	270.5938845	263.2329209	245.9950361	247.9292685	249.9759709	248.5129111
263.6303629	220.434136	220.0631889	223.2279501	225.0441305	222.4007548	222.4635824	224.5123088	228.9103956	227.9925193
280.191242	276.7919503	274.9526189	274.7237903	271.8476987	267.4694662	276.1937988	265.1161269	267.2424067	267.5587786
284.8920238	250.9544004	249.0526492	250.5327717	250.1702518	244.8376949	253.3936183	248.8058372	254.3492517	248.262063
277.5429238	268.8521138	260.5751853	267.2283282	265.611862	262.5390374	264.181308	255.4027651	253.0453077	259.0541751
265.8918042	227.0484866	226.6834702	222.1543338	226.0308709	221.171248	225.5877036	218.4140414	202.2056526	219.1166635
277.8050215	273.5717935	279.2029738	275.1213148	270.4327526	270.8655029	271.0519437	258.4852677	252.4423143	252.2543828
276.8096926	261.9772546	257.8924731	249.909264	252.547758	255.474902	258.7790472	238.5283465	236.4351246	241.9113843
275.8489934	245.2266663	246.7192859	244.1330667	242.0101002	245.0094203	239.54337	229.8518152	227.0783866	225.8140533
257.7940228	212.9605226	206.5562908	208.7622457	202.7946398	206.6264005	200.747842	198.64016	200.1658623	204.1864846
255.711898	238.8144322	236.194376	239.0965539	238.6183496	237.1547787	243.9890822	231.0709159	235.100515	223.7810666
281.6249958	261.0064528	258.8235233	256.4879846	262.4538532	265.3299904	261.6525039	257.8595412	259.288609	253.2349927
275.7594082	243.4769179	244.0382245	241.073455	237.1355381	236.3850283	238.910662	231.4912753	233.9385098	237.1420022
281.9703408	244.0256044	241.2553182	236.4893207	238.4190428	241.91494	246.6595009	241.2273868	245.4194058	244.1823799
262.3554094	244.1314312	239.1127405	236.5065	238.0104681	244.1678509	243.3543126	238.8553769	226.5389545	242.6725297
272.0273436	246.2180297	217.0681596	221.6211321	230.6021112	233.9343631	220.1946062	223.057776	228.6120273	223.2557391
271.9060427	256.7627882	262.4965502	262.4370298	257.9456191	258.1106294	266.2482421	262.2476561	260.4895846	264.3700344
278.8713035	272.9321109	282.2771358	277.6433632	271.9454067	268.0130501	264.5108381	263.2245849	263.0374139	261.9367218
285.9335645	278.6849491	276.3028571	272.5495622	272.7638383	264.1965574	265.5626833	255.5476493	255.7998603	253.1513413
263.3004648	240.1953011	240.9280908	230.0156279	227.6098647	235.8009752	230.5081657	223.3727613	224.6482849	225.4129523
292.6603943	260.4477288	261.8760266	270.3804359	272.2073764	271.1371808	279.9577774	268.8375095	272.9000675	274.170894
240.6470693	210.1283563	212.0635798	212.2993763	211.33139	218.4790822	214.0638251	215.897451	216.4107039	216.7378215
282.241492	257.5633363	257.1609994	250.4078641	251.0633738	258.6946887	255.5502695	244.036924	240.097233	244.2463985
272.5674294	251.2036427	254.4343884	248.618595	261.2692661	253.5146829	267.6320084	259.8200636	265.4389478	263.8845824
292.5885493	276.0524457	272.0367871	273.1861233	277.1391834	273.4878181	267.7137427	263.6865901	265.412278	262.5896783
268.5787777	230.4212513	231.5269026	252.1497096	255.0702605	255.8185267	262.9631842	248.5783645	247.7415632	249.7658628
289.99147	255.1432553	258.976796	261.9989197	256.8457471	257.4159759	254.5261641	244.4631428	247.3073937	248.794609
278.1014872	255.3795635	251.039782	252.1686543	252.2408	257.3400067	257.0891586	249.9353349	249.362414	248.046965
266.1460452	238.5217299	236.920525	241.0562009	237.460971	239.4220279	220.2120921	220.6234849	219.4226188	223.197514
265.7793176	230.9116823	225.8656318	228.9397043	229.3511043	227.1221209	214.3493293	217.1818561	213.1663454	204.4508353
272.5831941	249.3149128	248.7006022	244.4070264	247.4482478	245.7141216	247.6445346	238.4268048	240.8240386	242.6479729
292.0444014	270.6418835	269.0368307	265.1688978	265.369612	263.6046595	269.2292804	263.6774103	268.233937	263.3851916
286.7775833	259.5358224	253.7208723	248.836349	254.6113456	253.8759474	253.8225241	247.4180483	242.2390964	248.8630983
281.6501083	237.4771432	233.5474788	230.7421231	236.5154548	238.5795743	216.5024401	219.6116268	217.8927777	217.9235326
287.124616	240.971998	241.2210921	243.0181322	239.2226907	242.0269072	243.8470618	236.301438	234.7432086	235.8360211
279.7804232	263.5477517	262.0387367	258.5626543	255.408491	250.3443341	246.4614386	246.6951363	248.0773897	246.0045057
277.7673078	254.5523066	232.9917318	253.3681031	249.0094241	255.4979338	250.5771439	251.0816664	248.2691142	249.0695065
300.7227636	299.778662	298.5450833	289.4283748	289.8734537	288.7321668	287.7150759	281.6762642	286.1536333	283.9305852
284.250108	256.4179098	245.8793925	253.6809492	254.0454239	251.0784925	239.9533175	241.2563303	245.6075263	241.8655177
306.2675224	264.1842793	247.1425281	259.3110114	268.2656819	260.6669219	270.6247996	263.5339838	265.0776295	268.247731
273.6282831	246.1906936	253.5329662	245.1533911	239.7619328	234.1536063	235.2877227	240.513054	236.5086996	231.4397002
275.2522676	228.2736645	221.3594422	224.2358874	228.3389679	234.5337515	222.491438	227.6544021	230.692212	229.3561953
282.8694523	257.1575542	247.2565315	238.3139189	240.5292837	231.1319259	240.6367722	232.5425024	238.3578085	234.516572
264.8433347	221.1215965	218.7591363	225.0814544	225.2375506	217.0481883	211.5923323	211.7400452	214.0475988	217.2503553
261.4253391	249.9566055	250.702559	251.3024718	247.7479876	250.6530269	251.0102021	251.9645216	252.532552	252.0955612
294.2960247	254.1099815	239.9785125	250.6669812	259.3392606	260.9430409	256.8008998	244.6699294	236.2591729	244.4240341
268.2920835	230.6853039	208.7293714	217.9871792	231.8652289	233.4353807	237.9934065	230.8737992	226.316383	230.3461617
290.4473625	270.2058365	273.4334808	271.2238079	268.0919327	264.4341335	273.3249506	251.7135933	255.7190555	255.1925264
285.7052697	263.6846993	269.5053685	271.3862139	265.5046715	261.7648857	245.7706562	253.933541	248.9409464	240.4122979
285.3654655	222.5539045	225.9303669	223.9244756	221.7354772	212.0211118	220.8709658	207.9221143	206.5169564	211.5308854
289.8107207	247.8246687	245.7600727	238.9049991	240.8003354	246.6206888	218.6815184	220.9223016	220.8336312	220.9429063
297.1948856	271.1269337	262.7478067	257.3783972	263.1425865	263.1978782	257.4762553	242.478047	236.5686992	241.6203953
284.4430986	260.077647	260.5504021	258.0113209	260.3562642	257.4436372	258.7516983	245.8748802	248.0385966	249.2369035
259.6437068	237.7455562	243.0596436	257.0783241	257.2527323	257.9788624	259.3456464	259.7146723	257.3067314	250.8524645
272.0741901	253.1139799	246.4735872	243.0791892	240.6023698	241.6627533	243.3790172	239.8571952	235.5396703	235.8685618
285.4669404	274.5519492	255.6404117	262.1850415	258.9610355	258.7219418	266.6700073	261.9032575	250.1182789	253.6822508
266.6512752	257.3649428	258.5357976	247.4072959	245.0017888	253.0886428	252.8934138	244.3007104	239.4712062	243.0032192
269.0029445	237.4626306	230.0473026	234.68181	234.5594364	237.3467161	233.6274026	220.4723775	208.8872973	213.077527
268.926687	264.4129388	270.6481554	268.3121984	263.0851334	263.3789758	262.7005534	259.477495	250.6076837	262.9237148
266.1361106	224.7800626	220.5601016	212.0265571	212.0589864	216.5548554	221.4355567	216.8310101	212.1911311	215.590895
284.6273168	254.0412852	231.5441315	227.1530087	237.9631642	229.9798073	231.4206945	229.3292472	231.2817849	232.8004663
275.6108348	243.6046229	244.4602001	245.8915856	242.5117343	243.2299956	241.6097226	238.7614701	243.175357	244.4193967
274.6202505	248.4845203	242.0402747	237.8194695	239.8824835	236.3397851	247.458085	240.8651402	225.6449466	229.2888332
290.1439293	263.0572752	253.205272	247.1393886	251.5650453	236.7653307	236.0777292	240.7580759	239.6682908	242.8975878
269.2670506	261.1930117	253.3630334	261.0909858	258.1201593	251.4597742	260.7554322	255.4538192	242.4893347	240.7794513
273.990595	235.5453468	229.5218088	224.6680479	229.8362263	230.3242221	236.2524522	231.6689387	235.3512986	235.6747687
287.0420879	251.9695838	253.0980042	252.3144055	250.6179837	247.5308254	241.9726934	244.4054366	247.0061162	245.2793096
300.9680322	279.8321712	263.656762	258.8993825	258.8724204	258.8504785	238.6576368	241.0168376	233.3910424	241.5621534
287.0311512	264.3049775	256.1026106	255.2373276	256.191251	251.0218498	254.9354363	248.1477164	249.3372408	251.1445289
269.1808681	260.9376638	266.3279156	264.2546006	260.0553442	261.9023174	250.0388072	258.0652752	263.0383979	258.1290666
292.3437298	261.939224	260.0412359	253.6642975	252.6773267	251.7225193	255.1643941	251.0877629	255.5708947	256.2742288
265.6006226	250.8899979	240.6330462	237.2833126	256.3207112	255.9340645	224.6820639	237.966919	240.9960351	239.0745307
259.6437068	232.8450301	234.4934873	229.3843659	227.454982	230.3495378	216.1213149	216.7582359	214.4769909	210.5501316
271.9060427	237.711838	237.4115267	236.0137799	238.6871802	230.1877134	247.1030394	241.959974	244.8534619	242.3287241
261.5967463	217.7625446	212.8268514	209.9475773	211.8875792	212.9001537	219.1287456	207.315885	208.0537019	203.8123181
290.3068302	272.0278865	269.5010678	265.8433459	271.085294	257.8380331	266.74165	260.2813833	243.0073757	256.7436073
290.2201313	254.1228406	243.543173	241.7561095	242.1326843	245.1544965	240.918011	239.1271185	243.5042516	239.6592259
246.3544502	235.4586763	238.8186565	227.9784601	222.0667633	231.4358118	230.4880314	229.2430284	232.8768268	221.5224015
282.8188756	268.3731306	272.3474963	274.8033643	273.8312082	271.3067104	273.9590992	265.0934466	257.166843	262.2592073
272.1222735	230.9634337	239.6104728	239.3805443	237.9290374	214.1051039	215.534874	215.323986	220.9567297	213.3668701
260.6181973	245.2972476	247.5630763	239.9294097	237.3937644	243.0333426	242.9905289	235.9173116	230.4463869	233.1526723
281.9836133	267.1861386	243.3735399	242.1212468	245.4887625	239.9181382	244.6292116	243.0534553	244.941685	246.2369678
277.2480394	246.5549987	230.1697449	238.8191451	244.708755	246.597629	234.6059527	236.0872639	241.5692791	236.038499
268.3772269	237.7637342	231.8574647	224.4008226	236.1466421	241.6143302	244.909836	244.0537377	248.8829593	245.8507367
256.6507063	243.371928	238.8102644	244.0592735	241.2119044	239.585929	240.4411067	240.5320526	238.4581522	242.422145
275.1244808	249.8751189	255.3650387	245.1630925	243.0503471	242.2667216	241.4025577	231.566031	230.0884914	231.6111457
295.1036842	268.2817596	265.5600324	261.2585938	265.4476837	259.1503664	264.0947569	244.4405833	249.8586076	236.1550926
282.2831603	254.0934768	261.381182	264.3781722	262.0845698	269.713934	268.5950264	264.1212361	267.8596977	269.6695527
270.6149653	258.0191083	256.5682458	252.188981	250.1693244	244.8253515	255.7365877	248.7138976	245.9571345	249.0854593
273.3713174	251.257777	238.2627069	241.1267789	240.2745438	243.7296946	235.8420617	238.0754462	236.4455094	230.5238225
289.8447213	242.4023974	226.8707193	226.9258208	233.3891339	231.6875854	237.9567764	233.9999609	228.3347607	234.0089203
296.5687931	281.6911808	277.5832699	268.1485074	268.3424705	259.6739665	258.110236	258.5436988	261.1500857	261.9246753
291.2726901	275.1748618	268.1698764	266.042066	264.153345	259.9131939	265.9762286	259.474083	260.8054253	264.8198859
275.2736702	264.4340802	257.8430392	251.0057913	253.5864153	249.1656147	257.8776869	256.3568742	257.694323	256.4782629
254.0620679	215.4092407	216.738563	212.4961168	211.8769277	207.5985463	217.2582748	218.5124196	216.3421028	219.7456333
294.3616351	264.9117677	259.6617961	252.252655	253.8626261	238.7410276	254.910178	241.844395	242.8256816	242.442764
277.3205696	251.4135462	255.2526297	251.7832896	246.4867516	244.4361498	244.8203183	242.0836913	241.0704493	245.9468141
287.3066318	273.7514748	271.5153092	261.4658636	264.5441001	268.8814611	268.6773162	257.6669001	260.2728895	261.50119
284.7604691	263.9076207	256.9202984	252.526069	258.3916761	262.4510897	263.480458	259.1754515	263.8229154	252.9434953
293.7698202	260.4390495	236.5003522	237.9136783	254.7735998	246.7458326	259.0874423	247.7728457	251.9323443	246.1941974
279.3909928	243.6526608	233.671649	236.3607027	239.5823395	241.2788387	243.8740972	234.271354	233.3294594	236.8511597
265.4195698	240.8400253	239.2955232	236.6222094	236.3176461	236.881351	226.455684	225.5508971	227.829328	229.5979002
291.8580288	249.8059658	225.014735	222.9288394	238.1088842	242.4469263	230.589585	218.1380586	220.4456463	218.4258262
272.6408342	260.0561196	231.1838661	247.6587014	242.8709183	237.8479947	246.4047117	245.2075147	246.315503	246.5433385
282.8188756	253.287526	236.9550356	239.7145945	237.5205661	235.2454562	236.6358964	225.5422172	221.4395862	223.6186802
288.9587503	285.2460412	285.8749817	277.8489082	276.4453595	275.4504484	274.8744952	267.7327452	272.7172653	271.5464111
279.3909928	267.6242409	267.5359528	265.2286669	262.9136233	258.4911727	260.193553	240.6043105	242.5060516	240.2320852
268.2798788	244.0320086	239.5784193	240.1389533	247.0441098	252.7848018	256.9173426	253.6627174	256.4147111	258.0074218
263.070184	234.2290496	228.388427	241.4690201	243.8913191	247.0463656	249.7361182	244.9017736	242.8372848	238.6389298
268.0092091	241.8498843	247.9948957	245.1890933	241.6582053	249.173594	242.917607	243.9438626	246.6653917	247.6276858
281.3242085	221.1996148	220.4274818	235.7523699	232.3831489	225.5234436	234.8344298	236.0679595	241.434974	233.991367
267.1229051	245.9746107	242.669641	244.6501451	243.5740696	245.8081551	249.7982757	245.2032934	240.8337439	243.9786311
289.322057	239.5253919	216.4587178	217.1545902	231.1356797	236.6675142	229.2702783	223.4572318	225.2846684	222.1885653
302.5287632	270.5217809	270.2384732	266.807996	268.9395553	254.7815599	262.6498271	255.2735238	251.909134	250.0995262
274.9945921	242.0744223	233.4183955	241.7296955	241.0034733	229.0246191	244.3003267	231.5925711	233.7020549	232.0574244
290.3068302	271.8292966	271.5133438	270.9489981	269.9818297	264.8367435	274.8293567	256.7423038	257.1207602	257.6927507
273.4152234	249.251764	255.611768	257.994287	255.1449567	261.9889803	258.0029416	249.6623145	248.641258	243.3628345
268.2563673	247.4915011	254.4011114	251.8602901	249.1816703	240.321526	256.0398936	245.7491114	249.9710669	250.2943953
268.8202245	254.4206311	259.4011975	249.3207081	248.0688001	249.5661182	245.9374596	243.424832	235.9818196	243.0520867
280.1636813	237.5455066	225.7643421	221.4381174	228.5835763	231.6938579	223.6912856	214.3703682	215.8684748	213.7136255
283.0769816	260.3942902	254.7587328	256.6600456	254.6236344	253.7568968	259.9735757	248.7615375	247.3544351	253.6203338
272.0315426	272.2947803	265.7870161	264.464834	260.4723503	259.7130865	260.0193315	257.4641679	261.1515616	255.7459223
303.4285002	279.7290413	280.8424571	273.0790289	272.4514601	271.6406303	274.8424257	271.1543454	275.6890855	267.4849489
284.5749702	245.1330281	237.9283779	232.8049386	238.5749613	231.1858868	239.728823	221.4237063	222.0039111	224.3223458
275.2494891	256.7621064	248.584574	238.7351612	236.6944012	236.30317	229.7224409	227.7966322	230.6483121	229.4270702
307.3728246	276.4041253	281.3960354	302.1633653	298.3411744	289.3113874	294.5136412	270.1983335	271.6504555	268.5200322
256.6507063	248.9727457	238.113286	231.5839681	233.6047882	237.7468186	235.0806985	233.1176362	234.5634023	236.5937343
276.8096926	252.8233678	247.6925801	255.3527456	253.4440201	243.750087	258.3778669	252.2412834	244.6662638	249.331917
288.1455327	259.9498649	260.2221852	253.2283075	253.1355245	254.1418019	257.6488545	250.5542425	251.80364	247.6881788
305.2013176	286.9874198	287.2812068	281.2303015	279.0741774	274.9150289	273.0074174	266.2511958	264.5141351	256.0038851
263.8268945	235.0548221	222.9398656	219.4413869	226.6776556	231.0036101	221.6945815	218.9592239	220.6251005	217.6420766
305.7680034	272.4025475	261.1679398	253.7242566	263.7915853	252.4355011	261.7411466	246.0409748	242.559204	241.6977932
261.6421729	209.6114986	210.0188157	204.7559588	201.834527	194.5507469	200.3799459	196.9933564	192.5328476	191.255067
279.0033336	260.8508181	252.4841458	244.7371879	246.2429198	246.1642609	249.1268339	243.4010021	242.3624086	242.0425201
263.3973096	253.9001626	248.9837396	250.5454659	245.4410311	248.6734004	247.2115309	247.817599	243.0761784	246.7683065
294.2462149	238.2834313	214.294669	218.4205359	235.4704616	212.008212	214.9673613	213.3850566	210.1780345	211.6115559
278.3014811	259.4659069	258.3732634	253.2646385	251.0070047	256.1895315	246.3980223	249.9253299	251.680305	242.3955321
279.6114053	237.846138	231.1234094	222.7689881	230.0109441	235.7918687	236.3775796	223.7173066	225.1545764	227.5475169
263.3973096	222.5380236	207.2535893	227.9969791	226.8121121	223.0923277	213.3245164	210.7614361	215.657032	214.8980993
275.8489934	263.246823	257.7851954	260.6339901	265.6686335	260.9470275	273.9545862	267.6776877	268.268717	261.7586319
251.3432011	244.4360003	242.4173325	244.8946855	242.935127	238.1679733	243.6115981	219.1894275	221.8267983	219.8783975
304.0123182	261.1734302	255.8998992	253.2557893	256.0785198	257.1154804	258.3008444	255.6703279	255.7551801	257.6999327
262.3315494	234.9893461	239.3696133	245.0415871	243.5481954	243.4405781	247.1296266	244.031201	245.1978678	244.546691
275.2494891	236.7599968	233.9830646	229.53324	236.6144868	243.0197731	231.4638341	216.8415843	219.1317795	206.7492885
254.7842795	232.7142621	225.7095213	230.4388125	227.6983405	235.0215367	235.582547	232.7546147	230.6747905	230.7279105
267.3841241	242.0967313	243.0164817	238.94843	234.9671343	232.3893269	234.9095575	215.3976348	212.5721554	217.2805448
261.6466851	221.2552004	219.9063265	215.8599044	215.9060569	213.7420287	217.7199975	211.0409447	214.270529	213.5957922
261.0719546	214.821721	197.4175527	195.9875402	206.7945954	201.8201524	202.7263887	198.102641	197.3802811	197.532315
284.097633	248.6912291	244.9212705	241.3588528	240.1660511	236.0933341	243.2979851	228.0659089	227.6390871	230.2225731
279.7804232	246.5306081	245.5036388	239.66992	240.3412231	244.5798026	247.0617635	237.7233576	239.4705329	241.6477314
299.2416682	262.7681241	254.7749151	258.7681108	263.1107911	256.4196683	253.269439	247.9144614	249.8178406	249.4610358
285.5329337	269.7808717	266.1153121	272.7153139	272.9004607	270.1415692	277.5117707	266.1107995	268.195751	233.5832197
285.7919658	285.3591706	286.511016	282.5658858	281.5633929	277.3337535	281.5058767	279.4532892	284.4545104	271.5755943
271.6479339	233.4341932	238.4305026	236.3939505	231.4532378	220.8025448	207.2791823	216.4435459	219.0767764	215.5645374
275.2522676	256.525179	255.3182297	247.3009987	248.9411456	244.65964	257.7637359	252.9076485	258.8235539	256.2315904
266.6480804	231.825951	219.5863916	223.5108601	224.2759361	224.2445464	213.9537204	217.0759517	212.6909135	207.4770846
279.286719	254.3803673	252.071683	256.863895	256.795506	253.1248951	237.4404515	236.4976637	235.8209034	237.3243738
265.792287	240.9270757	243.3646365	237.4345796	235.3301231	240.1046205	231.8117589	233.8015388	236.4952391	233.8193836
287.4954568	236.0660693	238.2427315	254.588068	257.165915	252.4138503	259.8454407	256.2559994	251.2705982	256.7358663
245.8787033	227.1898678	229.1880933	230.7147596	228.2233275	226.0085838	214.9339895	217.462909	204.789911	212.668695
274.2442657	256.3610506	263.7977619	258.589308	257.1563657	261.1010418	261.2371935	257.8308261	260.8616442	261.5933992
259.6437068	246.087976	245.8806942	239.6566993	238.6166835	239.1437225	246.8930883	243.2665765	244.21941	244.6435426
272.0741901	244.5148693	238.7028718	233.2336205	234.6122491	230.0931619	226.5170725	192.4764886	193.8417264	193.9785367
285.4669404	258.8861724	258.9219363	255.1362395	254.7343324	261.2868897	260.8601701	254.9454937	258.9411876	256.2993611
306.0888617	236.9753249	236.8866394	234.3181414	242.1297761	234.4627938	222.8106269	217.0872763	218.5657512	216.9249232
289.322057	278.6871614	280.2571767	274.5739933	272.5798584	267.8485782	270.81591	261.2647035	258.5788055	259.9632708
247.1920651	237.7733688	228.4051368	227.5922894	230.0704532	235.5420228	234.230551	225.28738	211.7565376	220.5930259
259.2113639	239.741662	244.5915238	243.9070393	239.7441071	235.9963365	237.9633958	220.7800818	219.9856298	220.2863666
265.0499129	228.9485021	228.505791	222.8733317	220.839513	220.9446976	217.6440453	216.0698141	218.9323275	220.2414954
236.3519008	203.1677039	205.2649532	205.1368439	206.1437733	212.1680553	212.4707533	204.1329221	197.5638957	203.8664229
265.4195698	257.8614058	256.1142318	246.5919646	245.3129599	250.6786072	246.697687	229.7352486	225.9801965	233.1429344
287.4954568	275.1227191	269.4222187	264.6360162	273.0714719	267.061756	269.5674187	262.2260927	266.7501443	264.5213859
263.2030034	245.6926504	234.8912732	225.4230856	234.515297	226.0237429	227.9637808	224.2214115	229.5768226	224.8316947
305.9303578	254.0540098	250.1034549	244.3144879	246.9613921	231.795303	243.3772248	227.3771577	229.4610625	220.5827093
269.1808681	239.3766579	216.1309292	220.010147	235.0179458	235.6227695	227.7336064	228.5360668	217.5160478	228.3323611
283.1260484	252.6091015	241.7370486	238.9579512	250.0678957	248.2282989	253.0870497	245.6793967	235.9845587	245.923179
285.7919658	268.9991098	259.7765855	268.8257695	270.1681265	266.0949268	275.6233431	268.4177276	267.6861852	273.3431019
255.01955	219.26514	216.3182445	222.9857924	221.1088056	204.0462225	218.4915083	198.9891463	204.4201604	190.3962207
270.7346275	248.9295635	238.9652814	236.7568999	234.4428945	231.1373616	227.8011878	223.3656308	225.1744082	226.4026541
263.2030034	238.5327765	244.4370023	242.9987726	239.2394011	247.1470743	247.7533541	244.483953	244.9908161	248.8264851
294.400099	273.4902409	276.8853375	273.9095085	272.1112485	266.6203918	268.2559347	259.7191355	258.0562067	261.3184545
289.7925264	235.3637252	226.422472	233.9584731	236.0528527	236.7968883	229.4151165	223.4105965	226.5670531	227.7210598
290.9842648	232.8934754	232.4844114	226.1267499	227.0148575	226.1033442	228.5161811	220.7491092	222.7504698	216.7121901
259.4498506	234.390326	234.7766006	230.3785108	228.356288	216.9550548	224.2610519	215.0813948	217.274979	208.799078
283.5375185	273.3660641	273.8794764	273.6039483	270.2081093	278.5563687	263.8559133	270.8817712	272.0884682	269.8601893
259.5551408	251.5575813	246.1459336	237.5506577	233.3141634	238.5537458	236.0700199	228.9948558	233.6851566	231.9795849
296.2395794	279.6792269	270.9456739	268.8730002	275.6581785	269.1768099	268.052459	261.4489609	266.2910374	264.4082464
276.2911652	268.5257232	262.9113314	256.9146602	259.6572777	258.3494466	261.2828448	249.2791667	252.2535067	253.0335775
256.2237703	202.0255195	187.4841003	199.6473477	194.6247872	199.8239005	197.9540352	189.952622	186.1575552	189.3329251
283.7879992	277.7696161	278.4297182	270.3099805	266.7709808	256.9614791	262.9822591	263.2187277	267.9039945	254.891676
281.5198342	244.1163749	245.4819431	244.5968486	244.7721243	247.6021351	251.7334845	235.2125825	236.6781601	238.5925526
283.8501362	252.0735099	242.3654452	238.2728516	240.9290872	239.4843559	246.4205965	230.1981479	233.7428466	232.8302879
278.4306272	261.8469586	259.6764281	256.6304443	254.9690221	258.7606695	255.7941059	251.6658482	248.7368411	249.7032465
281.1727198	261.6066766	265.6844375	268.5055366	264.5962333	253.8723937	267.4657179	261.5857657	259.0363755	260.8276811
270.6998051	249.5649937	252.7457904	244.3918223	240.4310442	234.4826598	249.6945043	243.8623347	240.6928668	235.4035803
250.138566	216.5987611	216.4094805	217.8383134	212.130417	221.3728851	216.1313198	208.446472	194.2582073	207.357968
271.4912781	263.3428502	259.8611804	251.0334985	249.2351601	250.655539	252.0733154	247.3829141	246.6551681	252.9781636
300.2983416	285.7566414	272.8928918	270.5132326	271.9300285	261.5337549	273.381936	255.7062916	251.5975229	243.9751809
294.0811511	271.6038177	265.5790565	268.4290922	270.5703989	263.3451801	272.3475402	261.1752542	263.7730275	261.8254202
294.2462149	267.1826185	265.1991857	261.2304067	257.4666102	253.0488295	260.9446932	245.9490552	242.7221244	250.7814572
286.3085014	266.2925809	259.9206622	260.0963085	264.8580721	259.6601067	265.8105229	252.6782692	254.1913745	251.0210821
287.2556924	247.7549188	233.5986731	227.8941675	239.9283599	239.2781274	248.3756726	237.0918615	239.0516915	226.7233411
299.9612819	281.6017006	280.8144349	272.7750399	273.9949715	243.0264672	274.1416477	266.6145974	267.8035251	260.3049492
264.262698	228.3117723	217.0121433	226.3409336	221.2421295	216.8065503	210.2284146	212.4054399	215.9584376	213.382119
296.2992753	252.1412063	252.8012485	268.2946298	273.7760429	268.3943043	278.4876342	262.9384559	255.1499048	267.787989
295.6812133	270.2490899	259.6140241	269.5831336	273.9579419	267.2058235	270.6501375	257.3584312	238.5978588	255.72056
280.3023849	268.0190733	268.8924566	258.2688214	254.1565637	244.8061703	257.4085088	250.0650409	253.6778661	250.8805064
273.9799783	225.8997594	227.35011	230.1696952	231.7219928	223.2000683	238.9541904	231.339071	233.5347287	228.719305
280.4734878	240.4375632	239.9256001	234.151735	234.5259352	240.3556038	241.7393151	232.8534095	231.2907709	234.4384937
274.3984118	249.0672553	245.7872706	238.0786467	234.4221911	238.2782089	239.1435985	239.7793812	239.8995272	244.3732237
265.8864889	258.7028047	264.0699746	258.8979874	254.8982002	256.6581092	257.2746025	255.7129531	260.2753678	260.6220273
293.9528966	263.1030749	266.3096237	262.2381457	262.0028885	254.6516311	263.39544	250.0971365	252.8222466	253.2988125
283.0190591	218.2354237	222.6800895	244.7034471	240.8820148	232.8343921	228.4530403	227.8991517	233.049082	233.3953987
280.191242	275.3572395	268.3816839	262.6612118	270.0750552	253.4330677	272.5738653	260.8597052	254.5581779	248.6644652
280.6475228	240.5891098	233.3763162	232.0394199	241.5376202	237.5297898	238.4818598	230.6767518	236.6397052	227.2732317
274.9945921	242.1692372	237.7658615	233.4478187	228.2130444	194.8147688	224.8791573	220.7392709	219.9944321	223.8090185
300.3035627	270.2352073	259.3547077	257.5727138	265.1020231	260.8076456	253.7788979	254.6442331	253.7859731	242.7251397
270.2909682	214.1691461	218.6465764	216.4229696	214.1870403	213.8648157	222.0227836	217.1608418	222.6480674	220.1532034
251.9013704	223.9129484	214.5269833	222.6030171	224.0932088	220.4900771	226.0877018	219.7116993	205.3679556	222.658603
289.5554189	271.0075478	269.5181711	270.1684045	271.9784299	270.587362	267.2040074	257.3983555	258.959789	248.4575507
291.6973687	242.7434764	239.7703832	234.3607131	236.498387	239.298727	234.2360458	228.6484755	227.232279	228.5366963
278.9695677	256.218119	251.7191134	243.4940904	244.2764032	236.8288049	236.0730029	234.4831321	223.1454483	230.0506881
287.9712029	275.3460917	278.5744607	267.5850796	264.4908202	262.707217	262.6757737	248.3709785	250.8036877	245.383418
286.9411167	248.725632	242.598757	234.6673653	235.5301314	232.3269718	233.954565	219.0184249	210.3895275	218.9248519
264.8433347	242.389164	229.4996214	230.9870708	229.2597649	234.5447074	235.9148341	235.1451579	234.1731343	239.0328271
292.5065102	250.3589957	235.3532003	235.5351315	241.6246015	243.9738093	246.1723449	234.6505871	234.7931483	231.8079211
271.0661808	236.6755091	240.1810008	232.2470003	228.9478905	220.8677754	219.3091542	216.9084116	209.6141532	216.2205609
269.2670506	266.3240821	246.6280945	250.284317	248.4978278	247.8826037	255.1693569	247.4995467	243.6055081	243.5798424
287.3066318	264.7507922	258.4504231	257.9242483	255.4403249	257.3168066	259.7040178	252.0306139	240.7785299	251.4092935
275.1244808	267.754636	270.6293972	264.3752054	261.631146	263.9438565	266.2996787	259.295543	262.1789754	246.5219856
263.9424272	253.2316496	263.6562954	266.1587215	261.2169268	256.9114881	255.335511	226.3472652	231.291337	230.772789
247.9875943	222.8470245	225.4463963	221.7687007	231.4106205	230.9875981	226.2698586	227.298104	229.9626818	230.5946431
287.9712029	256.0809133	260.452796	259.9845204	256.8586822	250.6800931	243.3769417	244.2221546	240.4616041	240.2510918
276.1774448	242.1093311	237.5566503	231.9321304	229.1486732	233.1073308	227.430545	224.8720179	227.3089738	229.7282258
282.8694523	262.1501345	257.9777384	252.0962789	254.3983944	250.706263	258.5188881	251.1635888	245.7310162	247.0408343
278.2433952	243.3281794	241.7293634	243.0649299	243.7570762	242.2810386	245.0727001	220.1247131	221.3414388	221.966684
281.2035394	246.6640974	229.4302122	227.333924	237.0539842	240.7469855	232.8755499	235.2630385	237.4070223	231.7110879
282.241492	249.5972081	250.6826174	249.7341271	245.6262336	241.4771308	251.5513682	245.4302938	243.0693045	243.3464498
258.5359351	224.5198977	215.6850012	209.4992327	227.6566528	231.0871731	232.7429265	235.3547893	241.1081019	235.887668
275.7546232	248.2736316	236.2201034	241.5905178	246.571468	248.7877743	253.4283167	238.8333859	238.6063759	241.9568112
268.3460503	244.1935136	243.9843881	265.3524133	263.0494151	262.1435786	266.995607	259.7874202	257.7802529	257.1346606
291.0304857	285.7471174	276.7155528	279.2104487	277.14731	268.5402559	276.1843059	265.6380863	261.007492	257.0632493
263.7188921	232.0264882	225.0489023	227.6223288	231.8264137	229.5637942	239.7058676	234.6845442	236.7453931	234.6545581
266.4168601	250.8572778	235.0475603	226.8960753	228.7380711	223.6640848	232.4112262	222.2423533	218.6614148	222.4834757
283.0938363	262.2422395	264.3357094	256.7256981	255.5358327	255.719064	233.3602567	244.3833254	246.919106	243.0549753
248.0227064	222.7210436	216.4802733	228.7395164	228.0994585	233.6776126	234.1767794	233.1333709	238.1390912	239.0012296
263.7188921	231.0244475	234.3753622	234.7820734	232.062169	235.1218395	237.773985	234.2344762	239.1731076	238.4202082
275.347075	263.1315054	263.0541613	254.9334522	250.5906278	254.2458711	243.9838153	247.607795	248.5177038	247.9761484
279.7462884	274.7019079	277.178864	277.8374129	276.6511991	276.5324094	281.9743701	274.7093362	277.8431078	274.869061
260.8134512	223.2601916	226.4584958	235.8758268	230.3741166	235.046133	231.9482189	226.1968585	227.2931375	226.300912
288.1455327	278.9817061	264.3346394	260.783986	268.6463204	272.6118922	267.4466556	266.4781987	267.4574815	263.2627619
272.3582853	245.886563	240.6103588	232.7780535	235.4304641	240.5333684	225.7770196	223.4961266	217.8366724	219.4181368
256.6452558	219.270193	213.651826	218.4154533	214.2216155	215.7326905	221.9837412	218.9461808	223.3655843	220.3374131
302.5484014	295.533348	269.3413015	273.2803147	279.0927669	271.8611055	280.2533116	261.7193236	259.0449606	256.467151
257.3987162	225.0638693	215.9476323	222.6660084	224.7257427	223.5821187	233.0232109	222.3595706	224.3046089	224.8343269
278.0468918	242.4333424	238.7845073	238.9570585	237.2997015	244.7506609	235.5126442	237.834863	241.1630029	242.3187506
292.545514	272.7158765	262.5733366	261.8763238	269.3771101	264.7922791	266.367092	252.1983516	246.2514599	241.7374281
268.8917545	260.5054398	263.4068827	264.3954316	259.6028721	265.7266674	267.53537	264.8499584	269.6537446	265.9270716
302.690473	265.2534975	262.4192796	260.9856889	260.2888912	257.741603	257.8206279	248.6677152	253.6377639	245.4463326
272.8564827	233.7523636	243.6329985	245.4003112	242.7155167	247.8824001	248.0582318	250.29286	251.5575395	251.8742685
274.9509607	251.2601981	257.4863379	250.772472	249.6759845	247.4965675	254.4697386	246.0501936	249.5440401	243.2657762
288.615994	274.0719617	259.1526992	261.342019	263.5335038	262.0058419	265.4861573	264.1930087	262.861322	262.7589577
275.5405587	229.1220512	235.2058536	230.9324011	229.2911555	224.2541463	227.2224843	224.9803321	218.2209576	223.6321099
273.9532163	255.1746259	256.7777572	251.8706318	248.0192239	251.1357853	251.6368354	246.4177323	251.5806857	250.1344429
264.262698	242.4697009	242.3061819	238.2413903	234.9032211	232.1664653	238.355691	231.4718948	237.2473773	232.9730743
282.6449111	244.5234041	247.1764829	248.8578901	249.0372357	242.2817692	250.8176932	240.4501413	240.19688	243.3033919
250.1287936	224.856692	214.5398883	210.1504262	210.6044862	213.8281774	211.2099308	201.2500606	193.7062552	198.0095917
259.3657279	234.4708044	224.7749998	219.9963983	227.1892872	233.0519356	232.702873	234.0791042	230.9550441	237.6259359
272.0458448	265.5752043	264.6044377	262.8066751	261.5731448	257.9399647	257.0484824	226.9752223	230.910564	230.9390725
246.3544502	205.8935936	211.1471952	207.2801847	205.2293268	211.2355057	204.6439653	206.8242048	204.9591512	211.4189437
279.6114053	251.9416239	243.1807667	240.4577678	242.6857876	239.2833223	243.6456836	239.1222672	236.9326542	240.582113
296.724216	272.9026151	269.0200338	276.4403706	271.2383171	268.9289392	265.7483247	262.9593286	262.2114513	255.3658979
278.2584449	268.8965823	263.2040422	265.6206794	270.0075154	268.9678218	275.8509399	253.4942568	244.9844567	252.3900868
274.9063986	246.1367069	235.5454251	242.7024812	245.6531844	250.7629121	251.4872049	247.5347517	247.2234311	252.0248562
259.6477185	225.86774	230.5240868	226.7743259	221.3081314	225.0453666	216.8311446	206.13769	211.9886015	208.3803573
270.7346275	259.1768113	259.8820918	253.7903143	252.0578607	254.208787	255.6315836	248.2610379	248.9807474	246.446998
264.8433347	250.5563211	253.3901195	252.0618408	251.8870318	257.5486784	251.812303	254.6127829	242.6098915	247.1872277
257.6542441	238.2246842	236.0571544	233.1470256	228.5057702	227.0072975	236.2007951	238.8950859	243.3705412	243.6111457
284.6676397	266.5506633	274.2617618	274.6688574	271.8365276	271.878505	264.4811474	264.0811705	264.8604156	263.3274069
257.7875318	236.6137077	227.9573965	231.2238745	238.7529621	242.5555379	216.8990727	222.051051	222.8149139	224.7322543
286.201319	256.1961287	259.4325424	259.8721721	261.1300255	263.483905	262.3151329	251.7203685	246.8055621	255.4301902
259.9273747	243.48333	232.722812	239.7102436	243.9227158	248.0312409	247.9820496	242.9079123	239.3287641	241.6278724
262.1187156	239.564413	248.1165589	256.2881487	251.5034951	254.7232014	247.6840982	251.0774486	254.2287483	239.537328
271.8192931	223.9607627	221.2002296	224.0999038	227.1351024	230.0180867	227.5529115	220.4926148	220.0192652	219.6156282
301.8198449	273.3851937	270.571618	264.2402058	272.0092149	272.6575944	268.0323788	253.2947467	253.8090942	255.468204
282.8188756	262.9034517	264.6796981	265.5523502	262.0029924	260.5635816	258.7617267	253.7651732	259.0280521	238.2567698
285.7919658	269.779367	264.1332754	261.6496981	259.8058536	263.0552701	264.0337982	257.4897222	257.98285	256.8033253
270.066076	257.2209292	248.330107	240.7237016	246.0175836	249.0319547	252.2262926	236.0152839	240.0248304	240.6358539
257.6876105	235.9031281	238.7221783	234.0162522	231.302178	237.5546445	242.7999549	232.8428489	227.6968079	236.6253848
262.6280441	208.7314179	190.7932699	200.4910641	210.2771971	218.8577326	213.9279679	212.0609186	213.673597	215.590822
273.9542295	260.2048044	258.4764919	252.3485461	249.6171173	243.9920475	250.727325	246.21679	246.16904	247.0458061
306.4660009	298.9410591	285.1645869	293.0510022	290.6793739	285.6799726	294.8187894	284.9433842	282.8018008	286.3203045
286.7016354	260.335183	259.9246275	276.1347012	274.6154178	273.3569956	276.4205455	266.249367	260.4804478	261.1309285
287.3826807	231.6334347	224.7975363	232.6023506	238.3215404	239.6500887	237.1373468	228.2801964	233.9070601	230.5081719
296.4680187	245.5040212	234.3903089	233.1709493	231.3818947	227.307331	232.4246213	217.2237137	208.5836503	214.9549986
260.081998	222.9273509	221.6303793	236.9980113	234.8581788	242.769605	240.4138551	238.8623015	233.5651678	227.7681213
278.8713035	265.4079938	253.4132536	244.4158354	250.5489258	250.5779459	257.5443503	243.5888154	247.168615	246.7780665
250.6202406	236.3895532	227.8289293	228.8901491	225.3565305	224.2247813	216.4159968	220.427556	212.3837652	219.949155
260.4720664	224.5584592	216.7621189	231.3090421	228.2786499	237.4319574	233.6563098	227.8360548	233.0357888	230.4918442
285.5329337	281.1224669	283.1816501	277.827255	277.5175001	277.526175	273.3309492	266.3818914	269.7591099	267.1007977
269.7910664	242.5816601	241.8716355	259.0235128	255.2428033	230.2828208	233.9683008	241.0747935	236.9478099	234.0251207
297.4772059	286.2212652	288.9887289	283.8465158	284.9385768	285.7746409	277.0226521	270.2036856	274.0677816	271.0934631
262.1187156	232.1316309	227.220317	223.115285	220.0926018	226.66242	215.2240141	219.595621	221.2523301	224.6286253
292.6197169	276.4150378	253.2807325	258.5317256	254.5025762	261.0601733	256.8768256	253.775178	241.1063888	242.0269136
285.5542905	282.8473054	271.2865843	276.1648888	272.4834467	260.6612851	280.9157644	275.3293947	277.6908151	273.9824347
265.8864889	220.8750276	223.8639291	218.6544439	216.1528132	212.0490299	203.7683506	200.65128	201.419326	193.920152
264.8433347	255.7047039	258.0229796	250.4575734	245.6157894	247.4231556	239.749584	239.7342618	243.1046457	242.3193505
251.547192	220.7172057	215.212053	205.8797025	202.0241392	209.6859685	205.5612098	203.1678716	198.0718226	202.1151031
250.4316017	217.3250229	216.2583584	224.7008663	219.3476273	211.8328493	209.3324325	215.1237061	216.5891338	213.6943071
278.760025	243.1076487	236.0380707	236.6390424	243.5411821	222.1513248	235.5259545	226.7010123	229.5328644	228.5406936
269.1808681	248.4817705	231.5605713	226.0785586	235.5685228	233.9941723	216.4584817	217.3675181	220.3012394	217.1531652
243.6763702	213.5578219	222.9328239	219.4529434	215.6460505	215.2228726	218.0066271	214.2255401	213.199549	216.7829746
269.0366576	238.9999104	235.9110718	237.6542549	237.4734568	241.3403119	230.8107117	229.8706895	219.6992941	228.9490387
282.6236128	243.3346475	244.827257	248.5448672	245.5786035	247.9605165	252.5579531	242.7290769	241.2619317	238.6200796
273.0826392	243.2474078	246.5327744	247.5700218	244.252987	237.2633407	237.4310393	236.8348723	238.2901104	237.5041436
259.285167	210.4717928	208.1732728	211.2884047	209.6145247	215.5347434	208.7438123	200.9690759	196.5918907	189.4146514
280.0745516	228.9895808	212.9402923	220.3828047	219.2042253	225.1232976	202.5861302	202.8062852	203.9819223	206.3163175
301.1191794	298.5274756	300.0592307	296.1986851	294.6717051	278.9476412	287.234579	284.1441163	282.5353393	285.3372495
292.6197169	260.9981218	263.7188226	270.3625171	270.4860535	261.7537486	267.4277503	260.774834	250.1390422	261.1539005
291.8420142	267.9127258	275.6661898	274.5378512	270.5791444	266.6679109	268.2709519	262.1736913	267.5974713	263.9380131
269.9877776	239.1567298	228.243824	242.5840208	240.0772473	230.7997804	232.7691045	231.5140844	235.3909942	233.6807347
252.8914944	230.9507491	233.5101807	236.5206243	231.8415012	226.5564728	240.9849709	229.5925255	231.6580668	232.4854573
294.0537528	288.126181	269.052667	268.9350017	276.5882723	274.0291136	281.8989619	275.5321156	274.7758469	268.8693413
278.8713035	262.1448151	255.8842678	258.3337136	259.1767193	260.1679872	264.1797977	248.4535319	245.9364416	249.6925635
284.100919	262.133887	257.8732567	260.4681036	257.2493815	246.3204736	261.897325	245.7129062	245.4377182	251.6047298
287.0420879	268.9775431	267.9283545	259.1634031	254.4197828	253.7179568	247.1142909	250.4439945	253.3612619	255.3461478
267.2769529	239.8435704	220.0748665	231.5479632	248.4426629	247.9782955	252.2872175	242.8979923	242.3360192	245.5324969
253.5411957	234.0129137	226.2325598	233.3984813	232.952519	237.1737999	241.0303294	237.8880979	238.9189029	230.1545283
302.690473	284.8166529	284.7909596	278.6369505	281.2988167	283.7838236	272.6347326	262.3938505	260.858767	257.5029121
266.8906404	245.9428361	251.6442993	244.6651037	244.6358645	246.9931038	242.4565404	229.5969573	229.7725333	230.2885356
263.6286521	239.3070952	242.9505456	247.7498124	247.764266	252.7306003	255.7656804	250.2324053	252.0593859	253.429402
287.9893725	242.1042293	240.3708372	235.6532651	241.0318099	242.2394908	247.0184754	235.0156194	234.8741419	239.5013108
268.0092091	249.7803298	255.568118	248.1857699	243.3985624	248.9998715	246.5156145	245.463642	235.041445	246.1416707
265.4195698	220.0537733	216.0265784	209.3734048	214.0010311	212.5679002	220.8670394	211.8840689	215.1104645	217.526883
279.0033336	229.6432192	206.7578083	221.3511531	228.0099729	225.4596037	232.3984304	231.1516424	228.8817577	236.4183871
251.8500157	238.0364859	230.9619685	231.4408601	230.8887805	237.7095651	235.4501242	238.2290368	230.3783253	233.507218
281.9465741	262.5554348	254.7503228	254.0664165	257.8152988	260.9737485	262.9447834	248.5856851	241.2552722	252.6113271
273.241375	254.5212689	246.5259506	245.4520371	242.6256024	237.5294598	248.9766535	238.5064324	241.6529457	243.4051604
248.338596	228.3486896	234.3960532	241.6774427	236.3364009	230.0860457	246.4837624	239.5444224	239.3506399	235.7045292
283.0769816	242.1592601	228.4899614	246.8552759	246.5527291	251.3484153	234.3421459	234.636648	234.0568431	238.143946
267.970501	250.6287898	240.0401741	243.7568178	244.6109341	242.4142596	241.4309802	228.1303621	227.6220358	220.3970811
296.8485395	265.0264197	263.1419831	267.2658445	267.5130617	267.1074542	268.2008816	247.7204317	251.1006567	251.8607118
268.5376829	222.295774	203.2664443	211.3089337	206.6675614	211.1539968	208.8395493	205.3044094	203.3111055	210.9250757
267.5138334	256.1450146	254.3483044	255.1902149	251.5757255	259.4390438	256.2343224	252.996107	257.8068128	253.1351997
273.8720123	243.1794896	241.241795	238.6782272	236.2346596	236.093541	221.9316118	232.1273846	223.4594327	236.8686871
271.4912781	238.3080272	225.0575584	228.6574939	229.9664217	234.7627534	234.6602128	230.571928	234.7081006	221.9887039
280.3023849	259.059099	264.3563642	259.0122099	256.8349684	260.2786658	258.8284967	250.0009535	238.8481793	253.2621494
306.1733936	275.6497465	271.1408094	276.5941153	284.2530879	269.5514301	265.4484574	265.3835268	267.7025017	266.250885
286.7315179	271.1770963	256.6358472	256.9511185	261.8992391	262.1003818	262.9637877	250.8606042	248.2484312	245.6256584
255.711898	233.2216409	235.2859679	228.4550093	225.9071775	228.8252447	231.6301084	221.8717092	226.5401537	218.9890104
287.702145	263.4014485	263.9900692	272.6288196	268.0175244	272.8016806	255.3294979	259.0873476	254.2774191	256.2541732
274.8537756	263.8431844	262.2599897	257.5668695	259.2582392	256.8838994	255.3468327	253.9632174	254.4487133	251.5181907
285.7523938	258.1278876	255.9791882	263.4317115	262.0526063	246.246366	251.3446065	223.5351568	225.7617836	214.1404074
284.3655282	254.7336925	255.1113796	255.939306	250.9941089	251.2843589	247.0717299	245.5981953	234.1797058	238.215885
260.6181973	242.8308483	231.0641242	230.6149459	235.8957595	240.1832582	242.754774	237.9897871	242.6564465	241.8569959
290.1890528	252.0365109	243.6827265	234.3002673	235.9507368	240.6721946	232.7861231	232.5711686	235.9674954	235.6260309
270.5792233	229.2243991	225.5846592	228.6876248	233.1490172	231.0893948	228.8535429	231.6394455	236.1293745	236.3765797
287.9168714	243.5991099	245.4912935	248.4289173	247.1899598	247.0276047	242.0388424	239.0430765	232.4617961	238.9314993
291.8264037	253.6961012	250.8522785	249.1815359	252.0442171	251.9488708	250.2534577	237.6117948	237.5300626	233.1291181
256.6095136	241.0208677	241.7654171	240.1361953	235.9543362	240.4494571	237.0198793	234.0042775	234.9805633	229.279724
296.7429696	254.4417065	250.1418305	252.8100739	248.4569147	250.0599897	245.4440732	239.2272757	236.1364331	240.4739822
287.3826807	268.2131442	271.0290925	265.5840292	262.8120426	262.9793657	268.1657564	262.660152	263.9321483	262.4917227
270.878838	247.0213802	247.8864415	254.445362	250.0294267	254.8294666	254.0455578	249.6461017	254.0708258	247.7994687
277.1786126	242.7572493	247.3960879	249.4280923	247.706886	248.691975	248.6134882	235.8242844	219.6247866	228.2861243
269.0386136	250.2393545	253.591067	251.9516966	250.2541369	254.1062292	255.2784524	252.0836115	253.173867	245.5427104
283.7685282	258.623153	248.665365	255.8908178	262.0036906	261.2564919	255.3782708	252.7302815	251.8563002	251.5219653
289.0719914	241.6134838	217.1848739	232.5100816	233.0729569	224.5029906	213.2059011	219.3762646	221.9842582	217.6411501
290.2222664	264.067927	265.1149589	261.2819991	259.1854898	260.8626761	258.2770918	250.9341861	254.062475	254.6180705
256.7856354	229.1561179	237.0304734	236.6992981	230.9540083	234.73546	228.9852651	227.1684153	213.8970696	214.7826862
280.0059191	232.6369628	219.8761547	240.6614304	239.0809732	232.5610071	228.142863	229.4340073	228.3247193	226.288719
271.9202559	221.7067512	217.0710942	215.9217929	215.0725576	211.6035781	219.1962448	207.3001145	210.5257918	206.5880284
272.4205703	264.6972101	263.3932605	258.7916904	255.6340897	256.9578486	263.655828	251.7263069	252.2856592	249.1557271
306.670267	299.53114	295.2715704	291.195929	293.9712202	288.845412	270.9483108	275.9562645	266.9837025	264.914469
272.5674294	220.3928507	217.6318215	216.2783616	213.4090972	218.7675372	218.1106548	208.03478	211.3898751	206.6902446
291.3957597	280.9718756	283.6404536	277.3594486	273.9403582	269.4146971	257.4320428	258.2249323	256.5805215	262.3393503
286.590496	291.9594631	286.4552034	291.733231	289.0745372	293.5912267	293.4866952	290.4852082	294.0581543	288.1282692
277.3939744	267.0523026	266.1608468	261.5820884	256.6275503	250.6014846	250.5306544	235.2862201	238.8836428	236.826983
281.0563597	271.4464143	268.830326	266.5320791	270.0801829	262.6392947	256.7081754	254.6623031	258.3649048	249.5395716
293.2866	231.5665449	234.0915654	235.4448056	231.9029644	217.8314184	233.6658798	224.5204942	228.0955182	221.4983416
272.5831941	269.0598316	272.6605216	269.8041438	268.7284903	264.0142059	266.7841787	263.5023054	264.5762034	259.2966483
282.1889558	243.3601723	228.8648257	235.1976281	241.7677401	242.5346691	237.6179857	229.0391119	232.4457457	227.1852882
282.1519114	246.638764	208.9381353	219.4565984	230.5125562	219.7185975	226.9014664	221.4657774	218.8085255	214.867689
292.3140482	274.938016	267.206363	257.2141871	257.2630358	258.6800726	252.2900422	239.5411216	226.6328797	231.9303883
283.79972	248.2528253	242.7481621	234.5577493	232.9608688	235.7712723	234.5493752	227.1815085	223.9203048	230.3151175
281.3904776	258.4845249	259.2062417	250.3504006	249.7702811	244.5454883	249.5265788	237.8219566	239.2642937	240.1133757
293.698747	262.5701415	253.4343238	253.7719326	254.6490613	255.4543243	250.2546883	239.3402033	242.5377415	238.7573295
275.1411247	250.7352696	254.50413	263.6010489	262.0556423	260.0468185	266.8191299	262.2866473	264.3154556	258.7112118
306.670267	281.0267082	275.8117718	277.9457522	283.2953531	285.1927629	286.3150187	276.5436675	279.4254657	278.7381394
262.3315494	239.6267415	244.5103626	233.8641225	229.8231633	232.1835795	208.6611432	229.3231464	230.4465106	214.1446181
265.8812137	229.1266754	229.8958042	222.9156224	218.0346628	221.1103726	208.6800808	213.7766047	209.5320217	213.5475401
264.6768858	231.3710371	222.4834336	227.4235896	224.102035	228.3146715	220.6465418	222.8918631	228.4047224	228.2744079
256.7505458	233.5335072	240.9414114	241.0811715	236.3132271	239.3503166	236.7259335	238.5824679	231.9928324	233.37679
276.0095201	261.9608948	256.2110702	248.3702202	245.1684347	236.710902	244.1391155	239.1121673	236.3034687	229.9823149
277.2112728	267.2471293	266.1443146	261.8487735	260.9070391	265.0813552	254.7113094	260.4298701	253.3290343	261.4686249
286.2850288	256.5892952	245.831049	254.0217788	261.1444968	261.684916	265.1204682	244.7527658	246.4966592	246.8692618
283.4409665	247.2942332	248.1352431	253.0568061	250.3873965	250.7742126	237.3180369	240.2511273	237.8769234	236.7121406
280.0824894	262.8493907	269.7599045	264.6166391	259.4646927	268.1914102	262.0790732	263.8878968	263.5686721	266.815679
277.4706123	259.9216578	252.2645636	248.187013	249.2204642	233.2235351	254.6118584	245.7914416	243.368902	248.5316041
283.3410517	267.3930419	270.5991515	263.6144665	264.0152741	266.6524878	240.431507	241.7630546	242.6932056	237.9098356
269.9877776	244.7147535	250.6865323	250.8186865	245.9098351	248.448018	246.7596021	225.8981458	220.6123395	230.0933612
312.5485308	270.8265723	268.9538134	260.6465284	259.4743041	255.2339552	246.6365751	242.1036302	245.8423358	239.7948263
276.9532981	239.0566831	204.0058187	229.5263066	225.9511841	231.42397	231.8797298	230.080464	226.4891163	226.5764609
273.1437171	249.1979113	243.3189149	244.4221142	243.829727	250.0452061	249.7016661	251.1831269	254.0744127	247.3812193
271.9461153	235.1380883	233.6547319	228.457795	228.0172123	224.3414529	230.677925	215.0823836	209.9129353	218.0190003
283.6515379	264.9456467	269.339197	263.5934809	260.0266181	256.1789835	262.4437196	239.2369016	243.2231504	243.8768294
288.0873966	265.3032401	267.2057195	264.2337546	261.1835331	254.6518358	260.3943325	234.266407	232.6694699	236.3462432
275.7594082	264.2804446	258.5750041	258.0717611	256.6817046	254.2253576	261.4276825	254.7993188	257.3971933	256.7662302
277.3675163	231.451541	230.1075417	233.8453033	230.1039652	231.075325	218.3144812	213.0474761	212.6816372	213.4385801
285.4527604	254.9226627	249.2535495	246.4143469	247.1096087	250.8992199	248.1431963	238.1372419	242.5600517	242.521255
305.0139915	282.6056279	282.2561225	276.1055785	279.7092546	263.2800551	268.1206406	257.8593361	259.9031498	252.7546653
282.8881566	240.7875487	239.7960601	248.1860619	244.6463744	249.0140052	243.0868877	216.8573639	213.6119747	208.4844031
287.0005587	270.0507781	272.1293223	271.6116087	269.6900183	273.4870023	255.1199362	266.3603014	266.3848546	265.503496
281.554842	249.0400471	239.0606075	246.4402542	245.0991875	243.9581045	242.6227581	244.3637611	242.8792603	236.8666704
267.9464566	241.9538856	248.3069267	247.4650747	243.7151628	235.7109977	251.9559275	239.0430535	242.8498858	244.7219859
285.7919658	258.9243827	254.2538285	244.6582998	243.9636512	244.8841103	237.1483433	230.1416689	234.9228971	234.3783351
261.6935427	229.9843242	228.7722065	225.7811833	229.3734688	224.3795072	230.4694977	213.8450615	216.8562135	211.8383412
260.332331	239.9294106	233.4472307	230.0309764	224.644638	224.1325777	223.5397101	214.1168287	218.5617893	219.5660634
274.9063986	241.6523537	236.4582444	229.7060186	229.523147	227.0155793	228.8042029	230.6885811	236.024812	230.0831177
259.3657279	210.8944789	196.6357005	211.1037312	209.1156804	207.6584439	215.0447821	199.1423413	199.2472595	201.8739872
277.0187493	258.236074	261.7507196	258.5397254	256.2263281	261.6452716	260.5810401	253.9469057	256.3925705	247.2892947
294.7566516	260.1909353	258.8413945	257.9808902	255.4518673	258.6086808	259.2237088	250.3618732	252.491091	250.2147439
298.1772265	274.1146312	275.1401251	286.4184623	283.4290587	281.5429544	270.6248025	274.6965397	273.7902031	271.2862734
262.8795572	245.1194954	241.05558	243.3883213	241.9806229	245.4316811	242.5549154	238.2599311	240.3760857	241.4918592
298.2549086	274.9525383	269.4250429	269.3801193	269.1959325	260.4963398	270.5952616	259.6543055	261.7063455	261.8313792
270.066076	268.6937864	265.7525403	256.2165651	256.5477387	261.5832721	254.2728331	247.8545379	249.0339002	251.3278576
269.9783246	227.35741	210.0615166	222.9708088	226.651422	215.4225426	216.9363826	210.5885285	201.350714	189.3164014
293.3945011	273.4757381	265.3316611	260.261285	259.1057914	260.040179	258.1102518	241.9026805	246.524562	246.4219014
297.6883796	278.7592562	273.8429445	280.0921698	281.9885046	276.3175439	260.0475246	263.4163488	268.4032828	267.2149899
280.0059191	253.6699393	247.6656631	240.015725	243.9081213	245.3610445	248.9862787	239.9181728	242.2233516	243.0076286
268.9390355	236.6129701	237.6574593	230.5822435	234.9783211	237.2355521	236.2009945	235.0768102	237.7521555	237.3789816
290.2201313	256.8431806	253.5883666	248.4215373	248.5032762	238.2054276	241.8646014	215.2008573	215.9248424	215.4142401
261.7502175	218.4219695	214.2664644	226.3358493	224.456877	229.4423486	230.1519536	222.7047947	228.3818296	225.1242702
266.6512752	248.0000072	242.1838991	246.355266	243.3804985	245.6805896	246.309462	238.5759666	223.4343076	219.7210539
272.4016253	239.3344868	238.3692298	245.5036913	248.4555313	248.7885492	248.6718926	245.1807937	250.6654301	239.3554914
257.4695219	243.8103403	241.1596638	246.5953546	245.5910172	244.5890274	248.5234535	250.6426803	252.2159186	250.3287448
305.473102	287.6426419	286.0992817	283.720271	282.3191384	272.5073524	262.7875689	253.4105159	249.7673818	253.9072606
281.8354312	254.8823987	254.810352	247.766325	250.9619555	247.4076035	252.2244242	244.896945	250.1381718	244.4952113
294.1573531	270.8357968	269.3750971	266.5448042	269.6983324	256.7039721	260.6357946	244.7179713	245.2430119	239.5719418
300.5969627	285.4748535	286.5372404	282.3064979	279.2712404	283.6023186	273.1926475	246.5654311	222.2265625	245.4449521
259.1313138	227.3287229	229.1542275	230.3361842	225.3187641	227.5644554	221.812185	233.1856151	229.787443	234.6656848
299.2416682	274.5581891	268.8069456	262.1148676	269.8561039	263.3807215	272.966484	254.3327692	260.047005	249.2352938
261.3287115	250.1390502	244.0846468	233.6148264	242.1528644	244.3171128	247.5745554	241.1312652	241.0830821	235.7332589
272.2001578	241.389694	223.0953858	222.6287659	237.2127486	234.9562481	240.2787476	237.2829372	239.7940163	230.7340649
273.9542296	264.2948818	261.7675275	262.7962754	260.7030189	255.0208721	268.1688194	254.253074	255.2981376	250.390904
268.9681403	232.6675424	216.7414969	225.4693702	220.9604481	216.3914015	219.955786	218.2351933	217.028217	217.3660459
294.7566516	277.500132	275.4098574	274.834773	277.5044016	267.802014	270.5505728	265.3602807	269.5462721	267.039345
291.7502017	279.7968922	279.6549296	278.3270597	275.6596122	274.0194367	266.9564035	267.2282512	270.0285199	257.7896791
253.4456213	234.6813336	217.1849479	209.5167323	220.0061548	208.1719972	216.2480323	213.9074753	204.7148927	212.6573315
280.6475228	278.4139164	268.9423976	275.6249577	281.8045458	265.5164416	286.7772479	277.5370099	281.3787954	281.9837972
294.6193532	277.6074011	270.3622516	276.1877755	274.0216239	271.2343568	272.0129752	266.1826174	269.077252	269.2293524
280.0059191	258.3812708	250.0344291	246.2158211	247.0448839	247.061053	249.0027226	246.0081586	250.1450834	249.6633788
277.0487616	268.8173828	257.5490885	258.103309	253.6655792	254.9760733	252.6784885	241.3400825	244.8126341	241.1618048
255.9794798	237.601881	229.4234946	232.9016969	241.2485963	245.942626	246.5330571	240.5466756	245.9645848	244.773329
286.0382637	231.1630394	221.1618119	220.7011877	227.4432817	225.3139168	233.7185719	219.7717851	215.792108	216.9187081
256.8422858	226.1547288	226.2088784	237.4489635	237.3833674	237.393162	237.3281408	239.016288	242.2441871	238.9926638
255.01955	224.2316535	191.831495	206.8876119	207.8465741	189.0327697	205.4866255	205.767405	184.2688472	205.9318624
241.5397322	210.9167587	196.0326774	204.2931442	209.1022915	198.8218254	215.9453795	213.7599571	208.5990988	212.0276087
246.6421242	211.4599073	214.9356837	213.9529274	210.1378043	217.1635927	207.518249	202.5895081	200.9554415	204.9305978
286.832676	271.8934091	262.3505356	255.582747	252.3455384	252.6649301	252.240959	245.0387596	248.3114718	236.5721029
277.7673078	260.5813213	256.7915267	256.0414683	262.8748768	267.184119	265.8290488	267.0347629	269.3731153	270.6666521
279.1754269	260.0917165	253.1640403	254.2882658	254.6173431	254.374099	262.3717957	260.7160266	256.0172307	265.1643236
244.2363177	234.9699677	235.282273	231.7443438	229.8674743	225.784548	217.411026	227.2444217	220.8532008	215.2596338
253.0266944	243.6713478	227.8608184	223.4203579	225.2351056	221.0659108	232.8751473	224.3244686	209.9808456	225.8272753
266.7561936	245.0195769	248.7001522	238.6499466	233.2493803	231.264092	236.637699	233.9698104	227.1101097	232.2137363
279.7462884	266.0339818	268.7960924	260.6943527	255.9278725	229.9178246	247.3041486	228.1351598	233.7489452	231.3374198
287.4800764	246.129059	244.8503345	250.4321398	250.803409	246.6947612	248.388957	234.5321178	238.1573116	238.4265204
258.2499965	232.5334319	222.071713	234.0130467	233.4617701	235.4176889	235.3367877	224.115981	229.6296449	223.1078998
280.7499598	235.0527911	223.0436151	241.632808	243.3973427	247.4504312	247.9337448	241.0967234	244.1640454	238.0842506
287.7406089	246.8331333	232.2208819	232.3053554	239.3717187	234.825722	247.5224089	239.9286747	239.1163697	234.5380981
291.7502017	274.3437608	268.2188889	264.3627575	269.6338948	265.9034466	269.7737103	261.6211771	259.3081081	266.9220653
263.6831759	243.9050119	223.6441285	228.7738477	242.9112786	245.0764648	247.8874312	244.0567072	247.0888559	247.5302961
274.2452991	257.3095397	258.6788771	263.6449434	260.9497865	263.6542687	252.0078395	245.1284776	247.6348178	243.4826109
294.4707258	257.5551718	262.1935306	259.1222995	256.0733678	257.8949806	256.6536798	245.8279999	250.7114311	249.1839545
283.6746166	251.1766471	248.444221	241.6034136	245.0373214	240.4373438	254.3296998	241.3394871	245.9207323	245.1071052
278.1204632	238.9960651	246.2360431	244.1749649	239.6403698	229.2256157	214.2562783	220.234759	222.7008616	213.2948723
270.2293976	254.1721059	257.0939657	249.5923509	246.2852641	246.8983373	232.3994123	227.1416568	225.6134944	214.6078538
289.4976886	264.1008275	265.5966337	267.0729978	264.8432163	263.6243279	270.8931814	262.9995752	267.4136241	266.8325117
269.8493829	244.6662891	245.8852857	249.1385667	247.6261356	253.547606	240.6758741	227.3032663	215.9504811	229.3918214
268.1700777	240.4785041	235.1729962	237.0351929	233.3163438	236.9386683	241.9873726	233.544562	229.1477006	236.6157503
289.7626423	261.4571187	232.3927219	251.8543726	257.7871253	252.1288687	262.0968929	254.9023683	257.203422	254.7933979
278.0468918	254.5897457	261.4921334	256.9106724	253.6222973	251.6613141	234.2969015	228.7373085	221.1866122	226.9022639
269.8409535	230.472754	217.2734435	214.9037417	214.4235178	214.3609653	216.6947913	221.7853849	219.8450474	216.1719822
286.5004351	261.5666472	263.9931591	257.0166132	259.0284013	262.2489458	259.5095966	253.7490437	258.39324	258.2610665
269.2670506	256.7117874	256.6921303	255.6551238	255.942901	257.6077742	235.7326295	235.3106926	239.2035384	236.7067848
272.0273436	230.2496787	236.8407881	236.8037441	235.4084183	238.6970176	218.5066499	220.47504	224.3978778	219.2128508
293.0123789	260.102538	264.0098108	265.8790945	263.3934812	260.7270617	268.7520129	256.3585918	255.5904213	253.7691217
269.8071267	239.1306431	243.336218	236.272817	232.5798667	237.1056554	225.0347714	229.5184693	227.1699902	222.31681
271.0661808	244.1385133	243.0368764	246.1033563	245.2688277	232.9414542	253.1544562	232.3180287	234.3999023	231.9520925
280.752999	274.6910065	273.8364088	267.1024037	269.0876707	268.3685353	275.198661	259.5467805	264.1955411	249.208383
298.0218036	245.2878707	233.501212	242.7739839	241.7271425	235.6673732	239.2325667	231.4922318	219.4220429	234.8150985
267.7359367	248.1312643	253.7104307	253.1300403	251.5376917	255.9527843	256.1617245	250.9566834	253.7173228	242.4915236
278.1204632	250.6164687	252.0461369	250.6306617	250.7942645	253.3266663	238.3965348	239.050315	244.6228105	243.6323648
243.1357352	234.6202054	230.5172668	236.5402695	234.8984116	237.8756077	230.848842	223.004019	215.0734998	217.414896
277.9903446	268.8691472	272.0663799	274.4562994	271.9535262	263.6809788	279.692312	272.6902749	276.5407881	275.2690675
296.0723637	272.0924988	260.4172184	263.2805072	263.6427681	262.5912206	244.7889419	234.1857949	239.8616989	237.043981
286.7725472	253.3972736	244.7095406	251.2569177	255.236651	247.7824584	263.6467428	250.510172	248.6124262	254.6358513
275.7546232	247.7314992	248.3085096	241.9184839	244.6946396	241.9409501	246.326526	234.719285	238.9353681	240.3293729
299.8331913	283.7982877	281.0787203	276.488818	276.7927924	278.3511543	273.2235132	264.6931468	266.3306349	268.9376602
283.1902228	269.9572571	256.9180653	268.4787453	269.7430266	273.1637562	276.0063754	272.8423954	271.9226788	276.3864501
267.5670373	230.841708	225.6087556	239.5944339	244.4923826	251.1719361	252.5326529	248.67928	244.2515715	248.2354276
261.1973494	238.0670538	244.8255069	245.7370615	241.17989	245.0487709	241.2392318	221.7808912	221.7784022	224.4815621
295.1036842	272.869263	262.7943886	270.6556237	272.578318	260.7285274	278.3372307	263.5898905	266.9948753	266.4612278
292.7545671	269.0480452	252.1580335	251.2459364	263.8428284	253.8941229	256.6630684	245.2900691	241.1691571	247.380314
253.4456213	214.249716	204.1095311	197.7047501	201.4032517	204.8269269	205.3639443	202.5463809	204.9467158	206.9350908
277.3205696	244.7254325	239.1464739	244.7597395	251.9314269	240.3843548	244.4407837	242.8280852	245.6011624	236.4624987
283.3410517	243.6694035	247.6023799	262.1599119	262.4881166	257.2777222	263.9467366	235.21222	237.3587091	232.0366092
277.9903443	259.3968574	248.0230907	251.3227256	251.5563891	251.9984649	239.057116	232.615041	229.3477994	229.0263554
302.3521594	284.2566984	265.6638471	263.0413619	265.1691244	258.9102149	264.7699745	246.3002949	241.1348264	248.3381142
274.9945921	253.216804	256.670996	263.3242111	259.7035445	263.4066654	264.9386599	253.5386116	252.7809646	248.7252563
290.5864372	292.978801	279.1994262	273.335527	281.0616234	278.1453711	283.0183404	269.3564413	268.8667838	265.6632585
251.9159799	232.01737	235.5150634	224.2962228	221.4585224	219.3070202	212.3251831	215.5514012	220.0639947	220.565903
287.9168714	266.2396332	256.375346	253.4839222	255.6720644	248.8674784	260.3465183	256.8862867	261.416057	243.7535548
266.4348421	258.0365954	238.672114	233.451755	251.6637959	246.3143422	260.3689076	252.782225	248.7118228	237.5836079
296.7429696	266.9995747	264.8976976	262.1207995	259.568865	255.129258	259.7235728	253.9442231	259.1253167	256.6050088
254.6209926	242.1808848	245.118371	239.0938374	234.9157055	237.6118899	237.8158155	234.96573	238.7818738	233.7812346
254.5325901	228.3048139	230.9923336	222.8106662	221.045081	226.0949662	230.6602926	220.4996911	226.2391464	224.165546
275.1411247	248.7441658	242.9387641	236.6363006	238.3092539	234.3317691	247.6833187	242.6720792	248.2997399	245.1769487
294.4707258	271.9383825	265.0269875	265.3723043	272.7399117	267.8572988	279.2114562	269.7806158	272.8669494	271.7513577
284.057646	258.3416341	262.7481242	261.7005535	256.3487863	251.0524416	259.1834319	254.1286859	253.0463451	251.5388383
273.9542295	244.4029512	248.0291301	251.3469036	247.1639898	245.9090481	245.6728475	236.766961	238.5477384	231.4727506
247.1349404	216.1361771	217.7649621	215.0754816	214.4637408	212.4962253	220.2581487	220.8238479	222.6339727	223.9928401
273.241375	235.7620161	230.5369022	233.5550002	229.2556963	235.0757436	225.6798925	226.7336103	230.0881506	228.4435989
272.4205703	256.2888865	251.8046924	248.5316211	253.8489844	253.2301618	259.1749547	253.3425555	243.7057378	253.7866906
254.5765956	221.6388376	224.1071954	219.0420655	217.9725752	222.0105598	224.9932049	223.7863915	225.9952525	227.6022219
274.413358	248.4353783	242.1287881	238.3044756	233.9937025	232.4072508	224.1980415	226.073822	226.4970662	230.6205891
271.4788766	252.7046383	255.2014858	250.594196	258.2532455	258.8291724	255.882412	255.8313989	260.5157568	261.7129331
289.7673414	269.3000136	250.5859312	245.7114318	246.3572274	248.6978098	244.7888136	243.8013491	246.0831036	245.1459257
298.1772265	264.7221036	246.2633819	258.2099408	270.6200147	263.7599876	272.8310495	253.9286973	256.6444622	255.6649549
242.8597364	226.2092487	233.6570278	235.5992677	235.55066	244.4464675	230.8005546	234.13671	233.9847454	229.586087
284.609481	238.4060035	240.4181824	235.912949	236.5382609	235.1226185	234.476769	232.8364768	231.5196937	227.4346839
278.3014811	250.5412386	244.6219457	248.6724235	248.1128635	251.1588246	250.4763714	250.1810451	254.3204964	253.0391318
262.2802318	235.7231023	235.000568	246.5511424	241.8246222	249.437176	246.4786771	237.5737928	241.7483739	243.410122
266.6512752	232.1888421	225.8676694	235.1809575	232.5495373	234.1451022	235.9303564	233.1256311	232.8349652	237.2704397
271.9060427	199.5942159	202.0446252	211.5403348	208.9522162	194.9210028	214.4394759	210.8312004	212.7509937	204.6475763
257.7940228	236.5384498	242.6204591	236.3475438	231.9685418	231.1664287	238.56771	223.1423734	228.1469686	217.6165611
272.8003233	266.4467147	270.8996193	262.7218878	262.3940085	263.2070554	261.4660251	238.0958803	238.0765657	235.8736827
268.2563673	239.7802423	236.0404181	231.6914673	233.160043	223.6670089	236.5943684	222.655488	219.58483	205.3328706
302.5801363	282.4620419	275.870834	276.8093387	281.2835751	279.4512132	273.9019577	256.2308778	258.9295106	257.0183362
267.2287171	235.8664466	235.6648567	235.1296118	233.4785225	238.1777	216.6113203	221.4376689	222.5334429	225.3068434
246.1145809	214.6126155	209.1091708	222.165018	217.6021454	216.7689547	215.5254394	216.2723367	221.6643914	213.7805983
269.4409753	249.1001655	240.1057349	230.5296778	235.2494536	231.1038657	220.7953914	222.0181706	220.3278475	222.6283074
277.0187493	254.515227	254.9741735	252.0654101	253.9518455	250.5414686	258.1872403	252.8568553	257.3854496	256.5591895
255.711898	231.1624809	224.6054898	237.6001155	235.885624	231.4258797	237.51516	225.3388504	225.8520393	225.7862868
294.937112	301.572261	294.5223645	288.698221	287.4604277	279.8636409	268.6472988	273.0499637	271.8069576	270.7129538
267.970501	238.1246472	234.3884708	243.5598106	242.048576	245.5561085	231.2430984	223.7993068	223.7424474	220.8192707
287.2552592	266.6304322	269.5610689	264.8163981	260.8755305	259.6907188	263.705123	248.4199536	253.6655571	251.5693024
266.4597278	235.9789436	239.3323774	234.1061953	230.33996	232.8359427	232.6109048	232.7040383	228.2866073	236.3156673
311.8227376	261.5616133	252.3618544	253.1434514	256.1724929	249.521563	252.0916876	243.7302355	240.2220522	243.6893492
284.6676397	263.3685475	256.0171353	262.6082646	260.6481662	259.9477658	258.6084905	259.2078992	262.1177903	261.6382656
306.1680826	260.4855505	257.3862464	260.1024324	267.3052132	257.1917732	264.7973761	246.612729	251.6368965	250.4194199
281.1727198	254.331266	247.888094	245.9753585	249.7919188	247.5548661	249.3466357	247.6494449	251.3680046	246.9135212
298.7254707	230.6450228	223.1839743	232.4980333	230.8165479	218.8129258	228.0890389	218.5941975	214.9577196	217.9858066
296.6194565	274.3747705	276.9970348	275.0986452	271.3788778	260.8114313	263.7983381	240.4924736	241.0386335	239.1306694
280.3394241	276.6043998	271.0778983	261.8442322	262.0666361	260.8605706	262.5810106	255.1581664	253.6939843	251.3318485
292.240151	267.9712644	256.3515686	252.9925037	267.4212152	260.5257776	270.0997503	252.8927994	251.2901459	254.4855249
294.3144062	293.4504433	294.7771233	285.4791969	283.99365	281.5371452	283.8203552	265.0582087	265.9841834	266.707017
251.249027	233.9445977	237.9269413	237.5916293	232.8052618	234.8920096	239.0017824	237.2003393	236.1863838	237.9625721
269.0366576	255.8442936	262.8403682	253.2168151	249.2857993	248.4169785	243.9527898	245.734156	248.8869487	250.4500876
280.6475228	219.463344	219.2224049	220.6204166	216.6289801	216.2381405	205.196412	200.096638	205.8541993	204.2012061
266.8675675	238.9706801	236.6174196	230.2159026	227.5693517	224.3389329	226.2985643	222.4227509	222.6263035	225.5986385
275.2522676	254.1074566	246.1889473	255.7064219	258.0667394	259.4870319	258.9125933	259.6048957	259.2047399	263.1518333
274.6202505	245.4353989	230.7992291	235.084071	239.6765552	241.486593	237.3047692	242.3163192	247.2439384	247.8632904
275.1268111	241.0852117	242.4519454	245.243332	244.0824927	242.9666783	250.1027176	244.6613154	245.9920181	245.7210745
232.4449501	201.2399978	202.2101505	194.4479971	189.0996759	195.6519815	199.2364462	195.5116184	197.9542548	193.6185033
270.6249963	236.062831	235.5282218	235.3158104	238.0046624	217.8115774	233.2450246	205.133757	206.2130469	198.6326292
289.4572793	271.7387644	276.7486422	268.9782978	264.0079904	267.8246825	262.914908	247.5313116	244.8742957	246.4408498
292.7743417	260.5640658	259.2679746	256.0804083	261.1817354	254.0160004	266.0581561	256.354591	255.0189012	258.6229181
287.9893725	274.1898175	275.6294297	274.4053819	273.8248439	278.9698474	277.4567158	267.1048084	267.4181846	270.8451576
260.081998	218.070198	223.9999927	230.2040793	225.981702	222.6724136	221.9784188	223.0544153	198.308688	222.722098
259.6437068	233.8118361	237.5673231	230.3731679	225.8418995	230.8489431	234.1467486	229.1880041	229.1519915	220.8289194
266.4635459	235.6528494	227.9711146	237.6737763	239.850662	238.3358424	232.7031597	233.889511	237.7092587	231.684621
286.7016354	236.6361051	239.3956861	242.2551913	246.4020254	242.7957187	251.2929207	240.6637511	245.9972243	243.0387082
270.5181945	234.6493413	205.6212848	202.4494413	218.9388852	220.6349742	222.4783786	218.0822592	217.7085194	219.2990264
263.3973096	245.5316871	250.9893059	246.0594636	242.1169084	246.4971906	245.4406598	236.0548917	235.261052	229.5312433
262.8248449	243.7655794	242.0289323	238.2473235	241.8625217	243.0280667	248.0487667	241.6650688	237.2792579	221.4014983
290.1439293	283.0454866	269.0909987	265.4456101	265.0421083	255.9515277	257.6619855	264.4853067	258.1301447	262.0583948
287.9168714	264.4841323	238.4474856	249.5997503	252.271951	254.3901191	258.4596032	251.4161958	242.4233976	255.3605023
281.3734906	260.0021839	259.1117611	258.3984203	257.0980149	257.2346047	256.0991806	258.985723	240.9863207	253.8648156
255.8500994	242.3382276	246.8730491	243.2669141	239.7485362	245.2654104	244.7628517	239.2662496	243.442645	241.8385824
278.5194921	230.937562	227.7879246	237.0475675	237.4480874	242.3086423	234.8951934	233.2944582	229.4143112	232.3010071
265.7793176	245.1535592	234.8657794	224.6981843	238.3633322	236.9059637	245.7280999	235.0012402	229.9232161	233.6058439
282.8694523	270.2163125	266.2419934	271.6522233	266.3322039	263.4943258	267.6206896	261.6756513	264.7585757	265.0946217
269.8518517	239.7497039	233.9742446	243.8155083	245.9002959	239.1123832	251.2032033	243.0856797	241.364321	241.384047
281.1058728	242.6432943	240.0178864	234.5408254	237.6172438	234.2121677	228.9032762	229.8375728	232.4920104	234.6061418
294.937112	259.0553013	247.7019481	261.296676	264.0450919	264.1311093	265.3725544	264.9613737	268.8310178	270.043048
241.6163119	229.1099318	205.8236632	229.7766486	232.9079071	241.2573491	240.1788245	234.5703737	238.9617334	238.4669874
261.5725487	245.8994206	240.1882463	239.2246116	239.2793324	240.6983474	244.7228648	240.1126739	241.8771468	238.7120823
306.4624823	295.0846562	291.5479739	281.9605865	284.8760027	276.4834406	282.6827984	281.4403367	282.9507391	276.7786696
275.2736702	257.6640297	238.6673187	238.8985253	245.1822999	237.9332589	251.2671016	232.9868314	233.8021665	233.4410405
286.7775833	255.9165037	261.6018493	261.8927454	257.5259919	260.3667664	255.1835945	250.2050434	242.8422018	249.7053273
279.8316692	280.6225494	284.1617588	273.1586903	270.0867952	269.2336801	239.7619487	246.4901309	249.4382251	210.2195744
288.8114014	267.2830505	265.4124045	264.9066425	265.088385	265.221281	263.656138	248.5928747	253.2021956	250.554672
280.3907684	231.2729986	236.6747574	242.2646776	239.3809589	235.1744552	223.7454651	223.9053603	215.5665748	225.7582388
258.0040668	244.8211173	231.218443	227.3497609	235.017771	239.9815435	241.6806866	233.6265075	239.3180059	237.6045098
284.6273168	244.71822	240.6807319	233.3374591	238.4495251	235.2170045	238.9669654	229.3205291	234.7121283	230.5772346
283.4982511	263.2963358	260.1967326	254.8281973	253.8925847	252.2725423	247.1854137	243.2511316	247.7665777	243.6704073
288.9587503	240.7681394	227.4052436	226.5809973	231.694739	236.0211404	238.2798578	223.4330652	226.0480502	220.1375335
278.7978988	249.2029116	244.8088499	244.1292289	244.6867691	242.8452622	242.0905935	233.3294343	236.646502	228.189156
275.4314377	256.1689755	261.4864345	253.7839606	250.8355684	250.2091801	247.8462405	246.1428449	243.0937617	246.9445423
276.2182469	266.8051505	271.8665942	269.27449	269.5903035	263.5582942	277.9615968	260.8705869	257.3176862	262.7441241
300.7776565	253.5197824	231.2868108	220.5384441	232.4997569	220.160522	229.9307601	224.369623	230.1761255	224.7200406
272.4016253	261.9642244	259.9003759	266.2823323	266.1104942	265.3769651	269.7608877	255.2083334	254.6466421	247.563726
265.9582882	230.467439	213.7272086	213.976908	213.0387664	210.7386942	206.9296817	212.9942074	216.1638189	210.8202088
283.79972	285.1446505	285.3218363	274.8159312	277.9235689	273.2942958	269.5081464	267.4618828	270.2259025	269.366478
272.0458448	252.4740713	237.3262555	231.5939622	236.0819199	235.9749329	233.1790173	231.8795979	226.0163897	230.7072155
267.5138334	243.9755546	240.1262864	234.7171466	238.965549	239.7278072	240.5846501	238.6177066	237.4949125	240.3873065
273.6255254	263.4273175	260.3635291	250.660417	247.944364	256.0793287	245.8962996	245.1979664	237.8720749	239.6152803
271.9461153	244.1593648	253.0554409	251.656075	247.0747701	240.6483025	250.935349	240.5929242	240.0741416	240.3186012
287.4800764	258.2189435	255.5116937	252.967803	254.9513215	240.6957453	245.6010674	238.1628539	242.3021477	238.1932629
259.2887867	242.6482019	237.6740531	232.0131668	229.2921944	233.6063655	236.5461899	231.7473811	232.4985987	231.1947233
285.7919658	263.3162626	256.272196	250.5152668	250.9759862	251.5754695	259.2880113	250.0178902	245.9596029	249.4588512
288.2778603	257.0775418	254.276144	252.7409967	254.8105319	249.0162312	259.1487589	241.8706491	246.8353717	242.2435534
267.2905921	217.8725549	214.5098776	216.3579106	215.5589596	211.1163772	175.5756636	179.0917034	171.2436164	180.6288815
293.5462877	272.5121661	274.7088411	271.8004194	268.7197691	264.9828634	251.7299549	243.3889083	238.5007549	246.3973303
283.0938363	268.5586722	265.8360341	261.6256004	260.3193318	255.2778662	251.4123344	255.9775844	255.6419204	258.6240747
299.2493915	268.6793753	269.8604754	275.659231	275.678219	257.0082889	248.9235696	242.548351	222.3244599	234.3014264
293.3016599	267.1838043	274.0528398	268.906095	264.8014883	264.215114	265.4451031	257.4689782	261.759142	257.2131453
277.8050214	256.4802044	252.3415467	253.8201245	257.1558108	258.1381925	251.6474704	241.5286291	227.4592928	233.1574723
287.3066318	266.532894	259.328249	255.5859094	255.8372424	249.8571515	239.978538	227.2312959	228.5744059	230.4999168
289.0719914	265.2893648	259.0260453	252.3292241	261.9923561	262.4016784	266.5557359	260.5596276	264.2369197	264.7566152
299.2416682	282.0735919	279.4008989	276.0407676	272.3850317	271.0661879	260.2977772	231.5171433	232.1060002	230.3324636
283.1902228	258.2495138	254.7378101	245.8743926	246.5285983	245.7484353	230.7618068	235.0394461	239.2582461	231.0708137
250.5315039	240.9440114	231.2570998	225.2810229	223.5654499	220.2387352	224.2425032	215.9518402	204.8730629	217.6010696
290.3068302	248.3460865	246.3575278	243.0198306	247.2908808	245.9047309	251.365947	245.949266	246.8938295	246.2924008
287.4954568	251.5915771	245.5734433	254.2491464	252.5089652	250.4303077	240.1304403	236.0506544	234.3610617	235.9549731
288.1529912	257.553284	254.1588038	247.1172221	248.9066171	240.445705	258.1749204	245.5713125	250.5765802	250.1588745
290.4607143	260.6082649	259.2648026	260.6558941	255.5870764	258.2039897	246.6016294	245.8850635	249.8968733	249.1364344
269.1808681	255.1657255	258.0148478	251.9806895	246.7629265	247.9138199	244.1905222	243.656054	244.6853005	239.2370986
273.9799783	250.4624013	249.6049269	246.504282	241.5395394	249.7451456	242.1992649	232.0313172	235.1663775	234.5346266
253.4456213	240.2325981	224.7981573	225.6995852	226.6140357	224.8743665	235.1787307	228.1939151	231.442789	229.8045594
272.3652597	253.3691369	247.7136318	248.8444397	244.3355309	243.6547101	246.8387324	243.3446521	244.9681194	241.8565546
274.6122834	254.7707501	237.0448572	237.2974859	242.5807748	248.4282123	240.8060745	235.9560027	237.4847129	218.4405424
281.3242085	256.9003805	246.7022694	257.1940406	255.4917472	248.7068781	255.0333051	252.4657583	255.8429546	252.4042047
265.1262873	245.4128431	238.629727	242.7116316	246.8727876	230.4188025	240.0929773	223.8301582	228.812076	225.7513165
281.5198342	252.5633208	249.2209038	253.8988778	258.5362976	257.0060351	258.3519899	248.1743684	252.0592841	252.1143906
284.7604691	262.3831753	264.0531928	260.0913976	256.4522193	257.1274626	251.9940617	247.4546687	246.5294109	249.0976066
282.0622943	217.0339054	212.6873566	206.8535984	211.0775493	215.4856485	191.3821653	189.6036663	192.9940701	195.2289808
269.5219476	258.9274749	258.1802409	256.6309674	258.1033055	262.4535071	262.3385994	260.4645865	262.1558188	264.3706121
299.3238317	278.4098119	275.8224799	272.6099174	283.0410663	283.8424735	292.3493828	270.4774736	272.414686	275.4448172
258.2499965	231.088466	219.1201641	209.7990309	218.3786167	223.180148	216.7714748	214.4177311	196.3022681	217.940314
253.9626812	249.8563914	239.286788	242.4403326	239.2805526	241.6095166	236.785559	237.5034079	235.0184655	241.3380094
268.1700777	232.2806787	233.2368129	238.7350454	237.0026393	237.4452029	242.2014916	240.6816968	236.7842636	243.5755875
272.6408342	243.315571	246.004404	243.6454628	240.0176754	238.1776243	244.4605435	234.0804307	235.0893511	238.971695
273.4693748	260.8891834	261.3455475	261.8673256	261.6978787	258.9973156	259.7685922	258.8477932	244.5566239	241.3362029
268.4637595	224.7212483	220.004998	220.4441995	220.1400492	218.8798933	227.0802688	223.59104	227.2924713	218.5005316
265.0281578	233.0597175	238.2091981	244.6938781	244.4816034	248.1240192	243.4634885	232.6956312	231.3477936	220.9170689
301.1191794	263.5721957	264.44934	257.3917181	257.0771232	252.3503013	254.2877943	246.0153415	250.3930421	238.8755956
266.4271802	230.7257354	224.9744119	234.6309608	232.9321761	235.5873261	218.6031288	220.2859643	222.1192165	221.2490995
284.8920238	257.7138275	256.1190124	254.8474076	254.303324	256.0521099	252.5664397	248.6702561	249.9000436	253.2915134
253.2749022	240.4602269	238.0674783	234.1970423	233.263888	226.9001405	232.1470363	225.2488302	230.5263383	229.2813243
300.4440235	257.7215152	249.2128394	251.9610788	258.4074788	251.9075245	262.271164	244.6996265	244.4650721	244.9435785
279.4121705	266.2612738	274.583443	272.533515	269.7269505	259.3367346	265.0766186	253.7292907	255.7395251	252.9159905
273.7902643	260.7047988	256.9316132	250.3280225	256.6749667	261.3773866	249.0050549	241.6306715	236.9608189	238.8589285
269.7038962	254.6889678	243.368702	241.7507319	257.9187375	263.522694	266.9152379	255.2102137	257.0412015	250.2860373
287.3826807	264.1647687	259.1658138	258.1112818	262.0719426	259.5842834	268.2164234	261.7801099	267.0028692	263.904566
276.0095201	262.0670045	260.9914945	263.2919798	260.4743578	260.2551927	257.098764	236.2178344	227.3701144	230.445536
268.5376829	260.7605752	269.7596773	260.3203153	259.1562939	266.8681014	264.9875568	262.6145894	257.3192124	260.220446
268.5376829	251.270428	257.1061762	255.0815844	251.3312482	259.1639964	248.0940149	246.2174054	246.5496103	244.476448
277.5453907	251.4343765	252.9390616	247.2878837	248.5709307	243.0860749	252.1035601	249.0080726	249.2919508	246.2923482
271.9461153	254.4953135	256.1556803	251.4486417	248.5845799	249.5138538	252.0676227	244.6236262	244.0132228	248.5941249
269.0386136	240.5262483	248.9680962	241.7475102	237.1789063	239.4122802	246.6919637	242.7953211	245.857247	243.9471431
263.5432267	252.0559924	246.4731397	242.8686684	240.897014	239.5478117	238.9774199	230.6338671	231.7990463	234.9076919
265.8864889	257.7536185	255.6364944	256.671759	261.6848189	264.1614423	257.1703631	257.0478539	258.7076494	250.2300712
253.2749022	244.9267346	241.4002561	230.2051212	229.5912845	227.0621923	233.9208944	227.5579435	228.0780433	215.5744533
271.2849695	233.37534	225.9589767	220.6196638	219.8850748	213.4049043	215.8026802	219.6799883	220.8603823	219.7513927
250.447487	201.9927883	199.5862062	207.1123177	205.3025786	209.0381953	200.6898172	195.5707365	199.2720286	199.1635452
281.6501083	268.2568155	268.2506613	262.3988558	261.5813104	260.2504444	268.3149978	255.960343	254.2441033	257.9305158
272.4016253	251.6139453	249.8140719	256.375855	250.7535153	255.4230847	253.3172492	252.556037	248.3186022	256.2469214
273.2854641	250.3020634	255.6487287	263.7232796	258.067604	252.9897432	245.8590874	245.2373142	242.1046679	241.3608577
283.429266	233.5714266	232.9439056	236.9939332	236.0994789	230.8857915	237.3995862	220.1827839	219.51699	224.5969082
288.8829462	279.3897041	278.7745962	280.8075988	280.7204785	279.3250629	281.297365	270.1315807	265.2774005	270.7254539
308.192118	287.8382976	289.4469173	292.9375981	292.886553	285.4953395	283.2799467	276.3874958	272.1580318	275.1724203
274.0182577	266.9678363	250.1284657	248.361439	245.9624332	242.9626608	237.9348114	238.9119568	238.03227	229.9641521
287.6880437	263.8862218	263.4268146	253.2351841	252.7584849	256.9704599	250.4221615	242.0753879	243.9899071	242.3688751
271.8192931	236.225574	234.3912619	236.8058227	233.9711233	236.9352673	239.9766441	231.9364277	227.0470925	231.3533434
248.8851906	229.2026513	218.0009585	228.1305537	227.3430261	225.0844052	227.2898596	222.8412107	224.5435501	217.9315821
269.1808681	247.8152135	242.9504435	253.5869535	251.2647614	255.6461371	253.1511292	233.2804175	226.0474123	231.7843593
271.973763	232.9265918	215.8471416	215.1551792	220.0913254	223.1001569	217.8299257	206.4484148	208.6960943	209.866272
275.8489934	254.112539	262.5881942	273.3160962	268.7506028	268.7095972	273.4094966	268.9316669	268.1548699	273.515197
298.4505198	273.4160908	270.8181015	264.3683376	262.094946	253.097009	243.3980169	245.8784633	228.117583	244.4744399
265.3502896	234.6116838	219.0914059	214.2724332	229.5682219	230.2430625	237.6674854	229.0800929	223.2724602	229.7587181
289.99147	289.8944668	280.4520679	275.2278615	270.3455352	267.3890896	267.9847099	269.133291	269.3656974	273.7448275
290.4222504	252.530756	249.2938132	241.7061488	242.8143107	245.9662088	249.8802151	237.4810605	241.7782684	238.6298724
271.033923	252.2712681	242.995225	245.0134902	247.6436384	251.9688392	254.8632928	254.6420192	254.7897309	251.5843257
263.0167642	245.2757294	243.4699117	239.6983815	238.2605952	232.6539745	244.2211301	238.2833689	233.2626123	237.7505605
287.0005585	249.4551435	231.1541167	236.4863319	249.662519	245.9022399	254.0899527	239.5408688	242.7919299	243.3607158
269.0366576	250.2609675	234.0573206	245.5212078	246.3191108	240.6321738	249.8870018	247.8060341	249.8370675	253.0290153
268.149196	238.6518393	239.2710585	238.5855151	240.3475537	242.6988038	223.1404693	219.3263274	224.1393749	221.885737
279.2021968	264.5029222	268.237821	267.7954937	266.310018	256.4466174	268.0075885	250.6610624	252.519939	234.5393875
293.2965034	291.9715244	278.7441124	279.2206827	279.4667607	274.6329415	275.5256137	272.0056275	275.358746	274.0025069
255.4815313	237.876751	236.9388763	241.656495	237.5064468	244.089834	244.9835184	239.0666355	239.7195697	240.4520552
283.6888967	226.1874054	220.4614726	222.7362078	225.3981834	226.4964481	222.9381259	215.4322374	214.689347	210.5737712
262.4307065	224.0639332	220.9454235	219.3268885	217.0704839	213.2839313	210.6503355	205.8362708	209.0764999	201.1777469
296.4680187	281.7829281	282.946396	280.50989	281.0142838	273.4103572	264.1150294	266.6071101	240.6975732	240.3602735
275.6669078	252.4223226	233.4261637	244.32721	251.0038917	245.4741469	237.5424651	235.9285758	237.9947409	229.4442305
267.3841241	266.7330637	247.597339	246.510651	244.2698677	247.2486838	243.7777847	241.6957507	237.494851	242.0496144
281.979788	257.4151887	254.8756332	248.9751302	251.1050737	246.565495	240.1147911	235.8867325	231.3588602	239.1038046
281.0563597	267.3883121	264.5259659	264.104142	265.3197324	262.4063967	269.7980858	260.5528747	263.586216	260.6932062
275.3323635	245.1330027	214.518526	236.4210867	233.7053677	236.6681396	240.1069322	233.4649665	234.7105296	231.1358826
245.7270164	209.8778408	207.9388607	201.9752248	205.8137335	212.3710036	213.5128405	215.3052672	220.6629944	220.4630562
273.9532163	240.0026152	230.4488134	228.7557039	230.9411733	234.320563	236.3450431	237.3361542	239.4177187	239.9568066
293.698747	290.4492742	288.624677	278.7641815	281.2010295	273.2516615	288.6479046	268.6233338	268.1289425	264.638649
280.9934363	227.5401024	227.9921354	228.4694208	227.5082361	224.9300785	225.5317892	210.7822021	207.3806502	201.7886258
267.3841241	232.7113171	235.9588539	232.0284733	227.1723915	232.2991341	233.3985992	224.6324306	220.5537591	229.3130345
297.7885224	261.7374081	252.8877349	256.3248099	257.9753593	246.1237164	229.3869903	230.2351251	229.0579532	228.5237865
272.6940184	223.2506211	210.9280716	212.7867425	222.9103456	231.0580394	208.4364155	206.6661111	210.8312594	210.6165089
292.7545671	251.5229774	223.5360888	224.9116228	238.837765	228.9096349	243.6771279	230.8207655	218.2202252	228.6198065
265.7846953	254.1036727	255.1293746	250.0396236	246.6411149	244.7745154	250.7187355	242.832611	246.406918	231.4649293
296.0952189	268.7896456	256.5936742	253.0819508	257.8500118	253.1599411	257.264455	248.3030026	249.8430222	250.049849
244.8186931	230.8426043	226.9956236	231.1176851	230.3470825	227.59658	231.9114919	230.3144823	235.81647	235.7125496
279.2021968	252.1855552	255.2221797	261.5475926	257.933105	253.7414619	255.0877228	246.5216772	248.2060017	247.8971165
276.3185944	259.7595168	259.1413438	257.5894802	257.1019858	262.5436169	260.2471744	254.3204771	248.5490121	245.7128279
267.970501	230.0513301	224.0115135	222.9404231	228.2342739	228.751339	229.4091239	218.877385	220.3222456	206.0325529
251.8680049	223.3330468	221.3157311	221.5708989	217.7504979	227.1876317	215.6405461	220.729921	220.1988248	224.996386
287.3066318	249.7100537	249.2489027	247.9703808	247.0659322	246.6881164	240.6162034	241.6721151	246.7689143	240.9734836
264.8937558	244.4969314	242.7258821	238.0580329	232.6937912	233.0181464	222.1222567	221.0953823	222.6034563	222.7965026
277.3939744	268.4264269	252.1043301	248.6984164	248.1391796	249.2869682	233.2891388	237.1409749	237.7096915	236.4996753
291.3689147	261.4262826	248.2337497	252.6110553	259.6109707	237.9815129	259.1024874	243.5770257	246.8438485	243.4352652
266.7561936	237.4717654	224.4404203	224.7739621	226.7187914	228.5224972	230.8091943	226.9104097	231.1666783	231.8759011
280.191242	263.5150376	263.915986	261.1366087	261.1457998	262.8161136	265.6221579	256.4311217	259.6005762	259.3245767
247.9148456	215.1552099	205.8056574	207.866546	206.2146614	209.6056203	216.128906	211.4775812	216.3806742	216.0170675
280.752999	255.5737922	260.2267113	252.142532	248.9982159	250.8767131	239.34191	238.2546086	243.0392901	243.258178
268.7449569	235.8357822	220.2744859	216.2641325	236.1526485	242.7165877	238.6321562	229.0018704	228.4262578	231.1684442
277.1737106	251.618946	254.6228857	250.6674695	248.5735429	247.1387031	246.3431471	227.3387041	228.0554396	224.0810882
275.2522676	259.3350385	244.0240886	256.794066	256.7085669	259.8459158	264.1439806	263.6981042	269.481575	257.5960699
282.2831603	263.6544697	257.2133108	259.9284177	262.9120074	255.373355	258.4379864	260.4353005	260.610823	261.2706089
299.9612819	273.9272623	263.5458326	262.219953	260.6924915	252.8612124	253.46862	257.5459231	255.5389741	254.465626
280.156495	271.6104872	276.5030268	276.6696538	270.8299293	278.3625627	272.9033372	265.4073898	265.5640399	268.2582725
259.394328	234.1760831	238.8919091	233.3132585	229.65798	238.1644022	232.2711624	230.4255186	220.9252521	235.1103009
269.8130171	236.968484	235.3073778	232.6788343	233.6731877	235.2594317	227.1614765	230.6221726	232.3533839	236.0497608
305.1220967	275.6686096	263.5545064	270.7245562	277.2866134	248.9762101	269.4065198	252.984753	248.4104556	253.7708925
281.8354312	236.0668104	230.1903292	236.0550303	237.9467671	233.8874617	244.4895671	237.6227645	239.5600178	236.4694787
253.5529364	247.6269286	250.7222345	242.5743171	242.3812293	241.1702534	249.5182888	242.6463212	247.5241764	244.0381303
301.2405628	284.3087337	288.6738869	286.1068647	283.762166	279.8076026	284.168689	278.3911457	276.0003521	279.4622329
274.7409178	254.7416676	256.6471893	262.1663204	262.7355762	254.420776	269.7884031	264.9553956	268.3633124	269.7920319
237.0016392	219.6872968	210.2612273	223.0784872	218.0619968	219.0215267	209.7347633	208.7450381	212.4379862	212.8316639
298.7290598	293.3870329	287.6937786	282.8394834	282.2085578	274.9140512	279.9509494	276.268365	279.0718943	279.1971847
283.0938363	256.8619635	252.6373775	247.9538386	251.7444206	254.9069676	258.178802	254.6823785	255.5558136	258.275665
263.8268945	225.7852457	197.6618141	202.3834813	210.5297193	207.3356184	211.8473752	214.7031695	216.1714906	217.2548407
259.1313138	233.0659827	232.8914525	235.9498051	230.1348637	234.2599944	236.7743105	238.8222617	242.9649328	236.5984827
266.7954857	241.5772726	240.6172975	245.8387659	245.5533521	251.5817262	246.8570042	239.1466532	234.6549787	238.1220743
289.8447213	270.9509662	266.3356694	265.5032931	264.5250563	256.5744925	268.5039596	257.9800671	256.7392163	262.6072339
294.937112	279.7362858	271.4351292	266.8432782	270.6972648	264.9275322	265.6664883	259.5612156	263.1416718	259.1016155
297.030609	272.8082339	268.0718104	262.7585	265.8145154	256.7732105	266.6105805	248.2049557	250.2720314	250.1611633
290.2222664	265.1838874	272.3823055	272.7156285	269.3807951	261.7849706	256.9982429	254.2527514	258.1245881	257.8213262
284.8920238	246.313034	231.5660631	239.0205191	236.3899266	237.3011814	240.999968	237.4257596	239.6260571	233.9053134
272.2001578	257.474998	264.9577107	259.8097501	255.2899923	255.4921398	247.8940287	245.8096211	250.2720119	247.699421
258.5659321	234.7502684	240.8248881	240.3526569	240.9059845	240.9956733	244.1687441	241.5045253	242.710082	245.2950742
289.7884432	256.8643029	239.2536041	235.240566	242.9076503	235.2099607	240.150421	228.0155221	232.3214086	226.9697813
269.0366576	250.7291455	248.8668281	247.0405941	242.7112176	245.4141406	242.54658	242.8525288	243.9267392	246.8343112
307.9593995	267.3828547	267.9232222	276.995541	276.0046014	270.2288285	280.3029204	266.2985583	270.1139232	266.4905911
296.8018981	258.8862897	250.4876549	250.1857294	253.555212	250.399909	253.6358766	242.6434935	245.578522	244.9581271
258.4255522	215.4797594	219.2530213	218.9744884	218.4374643	208.736473	222.2802324	212.297596	215.2458502	215.4187197
283.0190591	232.8478957	226.0701017	232.5643309	227.9195801	229.7445719	216.6451099	210.2122082	214.5902992	215.0090308
254.0820256	225.8033482	222.8058836	226.3175842	227.8750476	233.7961504	228.4768795	226.7476156	224.4801885	223.847406
296.3355119	265.1458027	263.4436632	263.7577708	261.4898891	241.6943767	265.6202975	242.9470182	246.5612586	248.0921209
295.1036842	252.418928	247.9384901	240.2571875	239.9022962	226.718299	238.4497198	222.1350268	221.0694726	221.8429101
279.7582644	246.4209059	238.2454836	233.3377628	230.7860546	224.713364	225.6831083	218.6800184	216.1897046	220.8427718
288.615994	281.3353769	264.2544693	259.6510334	260.4127782	260.9578981	265.9778175	258.8905056	263.1266116	263.9623039
286.2731451	263.2495646	260.2646613	252.8542284	254.7701205	258.6300609	253.7988114	251.554577	255.7666025	251.2570857
294.6193532	250.2908476	239.6412265	238.8186952	241.5803861	242.364534	223.010314	221.3388787	223.3090761	220.3206413
264.262698	245.1886739	242.8542855	239.8372823	239.6120772	237.2459681	222.1152379	221.9333742	226.9637241	223.0389722
299.0255098	255.8277274	249.8846593	250.9426638	258.6470048	247.0049483	264.2205454	251.821182	254.5753071	255.2048513
267.3841241	256.5405307	253.3788637	256.7894778	260.2526662	252.1390124	267.0121857	254.7990698	260.367942	259.1550524
287.2552592	258.2431623	265.0426795	260.2374477	256.3901399	252.7671625	254.3726981	233.2432252	232.5705678	235.8222119
282.8284336	268.6293644	270.5068088	267.872549	266.8800834	262.0082987	267.0412241	261.8519546	266.1513062	263.2496387
270.7346275	263.5523169	249.8597896	245.6921281	244.7907484	248.495275	245.0485827	241.421167	240.2288856	246.5105555
287.0420879	273.5007026	273.9519681	266.0603499	272.5350468	273.0650785	274.9291015	261.2026899	262.0362326	264.5601726
274.9063986	237.7729552	228.4046096	231.3374086	226.9802402	229.7931433	212.3157224	209.9884802	207.0574868	215.6048972
251.0076565	215.4216636	222.4811341	227.1296866	223.6882666	216.3588748	225.0697035	202.4044576	207.8757502	200.459262
266.4635459	234.4544969	225.064293	215.1146616	218.5517604	218.560893	215.6947364	218.697517	215.0602478	217.5938635
277.3253785	222.6061638	227.5532925	229.461638	229.5418043	229.6667121	221.7767488	221.195418	206.0366543	226.7117354
291.2968983	275.1489144	273.0120077	266.5819983	267.205882	262.4768849	263.9195852	259.4680736	261.683826	253.8619841
267.2769528	262.360241	264.3193508	257.4008291	254.887645	248.4503658	242.496153	221.3405775	225.6402596	222.3780354
306.5622251	292.7891031	288.8129042	284.7970316	282.1404523	268.6046388	278.5496936	268.368539	273.3820305	270.4894772
280.5255757	235.5199025	229.8700625	225.2066001	225.09753	227.1387958	226.4709344	219.550493	224.8221146	224.6277259
275.7546232	249.008407	238.9680694	231.6950344	240.9134483	244.6103624	245.4185498	235.3597719	230.6120972	238.3934918
270.6149653	223.4391703	206.2420122	218.279203	220.1150092	220.7753133	212.4197818	213.1646687	209.5439604	218.1258069
270.9509198	260.1880287	247.2829965	248.6519365	252.6621477	256.0625423	255.8324904	258.4292048	251.2851655	248.4331275
285.8801285	262.0602836	250.1379332	254.1053202	253.9997322	249.76452	251.1315839	241.8475725	242.8890184	242.6473599
283.4982511	252.3379637	241.9287068	239.1557672	239.0074126	235.3444584	237.2013417	235.756779	234.8703296	238.6912497
267.5138334	234.3696209	214.7650494	219.8776969	222.0866849	225.9064122	223.3543441	221.6953899	217.5941767	217.5872575
297.7503081	278.1690933	267.7822251	261.0437344	259.7771357	260.2149191	245.8864137	247.111698	247.9106843	243.6960639
260.1282364	226.7262597	223.5113324	218.9708224	218.3231775	222.9455598	220.5637228	215.1766373	216.8792544	216.4416239
280.803611	268.265574	272.2040652	268.4171721	264.4076552	265.2370158	270.8991328	266.4873189	268.7152739	258.0126216
288.615994	275.2823929	275.4490553	276.0196079	276.6381842	281.3789558	272.7971715	271.9312279	264.2529539	259.8293866
275.7546232	232.9396096	230.1066676	224.1085628	225.1961353	219.784779	219.6899673	210.7529188	212.3760356	210.3138283
243.9586147	211.7694437	206.6205025	209.2426301	209.7875084	213.7893555	200.8517905	198.4468829	201.0989256	203.4001395
281.2279459	271.3489021	255.8224361	249.119713	252.132765	250.1419034	240.5066308	229.0930258	227.275678	220.8791701
276.9532981	249.9553573	218.2608636	241.099916	236.898674	236.3535058	239.4055544	217.8264155	223.2269909	222.3262299
270.066076	233.0797464	219.9932233	220.2063839	238.010264	245.4567749	238.950768	241.6339004	241.997852	229.3072099
293.3246674	276.4374359	259.3827779	253.2051344	256.878784	254.4128213	252.0172305	244.7021482	247.5735413	247.4476843
269.3729292	249.9973919	247.1530436	242.636146	242.6973936	247.0081981	243.6691611	234.0849274	232.4700199	236.2377045
255.8036631	217.3887269	217.9956198	211.6530433	207.8065914	215.5009249	207.8252668	218.2211015	214.0541154	222.0242043
289.4572793	253.3142962	253.3351685	257.2730196	257.4083685	246.2946031	257.8485399	232.6366851	236.9488172	237.6529345
277.4785536	238.0930654	233.9208894	239.603923	236.1762051	227.1445453	238.576299	225.1839955	223.3462123	227.8652041
269.5938479	259.6355907	258.0937923	251.2734964	250.1733755	251.7080996	248.3012615	241.8601362	232.2213813	245.9184347
243.8721869	220.2180999	205.8510383	207.7228978	211.8136456	218.3511115	218.268193	220.3486042	212.1253727	222.1871795
272.4016253	247.9175862	250.0017761	241.2849456	241.8298298	241.4149914	233.1629032	232.2170566	236.09688	236.5707419
295.1684666	294.1318905	293.0905862	288.5472438	289.8754199	291.0640486	286.4258679	283.0160666	280.350454	279.7592441
264.1152359	231.5537285	236.0843632	245.6331482	245.8745845	251.2448284	254.3733539	245.1465913	246.9929159	248.3201852
267.4198403	233.7330312	229.9971194	231.7739312	228.4966768	220.1889368	225.5186865	218.8098773	216.0613319	217.57456
250.6430211	242.0150342	236.4992718	228.5707549	227.0968029	229.8539736	226.2428725	223.9451815	220.4627985	223.8127809
267.0982578	250.7943552	258.7417236	254.2939827	250.3786354	245.4322142	243.1077202	246.7120382	242.1833207	244.8954749
266.3756267	249.952747	249.1098068	255.2162178	251.8972903	253.05317	254.165317	246.6826073	249.2871033	248.2005603
267.7601257	228.3856565	214.9418743	220.2714615	223.3733517	221.3175758	229.5571422	219.6240817	223.6941097	224.0798182
272.2561387	232.3373421	235.8334635	231.5804539	227.3107357	229.1739013	234.8422589	226.716079	224.2871569	231.4933407
286.3565809	236.4269727	234.1745935	227.0361649	231.3156187	232.9722127	236.2446467	222.3953077	217.3933442	217.881746
271.8192932	239.4236869	234.4187355	240.9951066	237.0775881	240.5806399	239.3716828	237.1227667	240.4403474	234.9191747
275.1791784	213.9940265	205.0793895	196.4498038	199.5786769	194.8980777	198.2441954	178.9266864	178.1814912	184.5169456
313.9752536	297.1881977	278.2815217	269.7469935	283.8933913	267.6883638	280.2279035	261.5577548	252.5470085	258.3888336
288.1455327	260.2093041	246.7542728	246.2435758	251.6931965	243.1969087	246.928574	240.0737356	241.1618592	232.3875269
256.3398624	228.4223996	230.5462984	232.5583264	227.0208614	235.5819508	229.1150721	224.5902217	226.3913505	218.9952075
251.8500157	247.5796683	252.4714268	248.9794427	245.2923089	244.7249004	248.1159439	246.4498473	244.4622243	242.7310981
269.2670506	261.3026314	262.0710225	263.9565227	262.2224758	258.2258208	265.4377284	247.5152257	253.1335592	252.8977603
246.1244464	234.9889832	238.7390781	235.2445578	229.6661548	233.1627135	235.4312666	234.0907639	234.6895227	239.2681658
284.097633	272.1374288	266.2370536	261.4309404	269.0094341	264.1160685	256.2758464	252.3175361	257.1041747	249.6362695
288.5053814	280.7253798	279.0359163	269.6177787	268.6110665	261.5015402	250.1803339	235.1429578	234.2819185	230.4683616
270.066076	244.4371438	246.6350991	245.2526722	246.0439784	252.8369921	247.3723599	245.393386	250.8543051	247.7315024
270.9629726	252.9628319	241.8483818	236.7294912	241.0607911	242.2497479	236.2826606	239.3808727	241.8109403	239.5859029
282.8694523	250.3165849	237.0103111	233.6626649	236.5528366	234.0572522	245.0214783	234.6922892	236.5407213	239.2663794
283.2065843	269.417851	261.8533005	252.4338036	252.2640596	242.6529747	251.8459372	236.4767392	241.4743205	239.6796302
268.926687	242.4474329	248.1178625	249.3346125	245.5026378	244.0026868	250.4914062	237.9631605	236.9093556	236.8035328
293.7057042	277.3274194	268.8019973	279.6651887	278.8761692	279.4627579	282.6543835	283.0916839	278.6905259	279.0610121
264.1830102	252.3847088	248.3887117	245.5741673	243.1870796	243.8955587	247.7463535	254.2298866	252.9182643	249.0965209
271.4912781	253.5098095	246.2130799	249.5481715	247.3786228	243.7905402	248.9328055	242.3681437	245.6259472	243.1073075
268.1700777	260.3090971	252.9659577	249.7786738	250.6044531	252.2646554	256.1727475	246.3984904	250.5247675	246.8718519
279.6044951	262.947544	264.8084187	263.76328	262.913936	264.2175083	259.2291472	251.7315691	245.7210489	254.0103689
279.6044951	258.1296676	256.6132713	253.7911719	255.9585106	250.4826533	252.3174074	244.6109858	246.0947683	244.6356923
262.7619088	248.2823338	252.6085098	250.0554159	246.8185424	243.1384819	246.084818	234.4860838	239.354818	235.495211
282.5329128	243.5537032	249.7958701	258.3279628	256.032357	253.2759926	249.2294461	234.9722767	229.6112619	239.7013779
279.0033336	243.209386	236.4110561	233.3690653	238.963919	239.7092667	240.9397432	241.137146	244.9453818	243.3608223
257.3987162	227.8941215	228.1663736	223.1792831	219.0535032	220.6708719	217.4333176	216.2044001	216.3014463	211.7281553
278.5194921	240.5273359	243.8932741	237.8161383	235.4134885	223.5562127	214.098513	213.6774224	214.2559671	217.0026652
285.2220862	227.137665	232.7990569	228.7731975	227.2969252	227.3068539	218.008386	213.6751904	213.5645792	216.4437458
282.7925434	229.1802519	230.5762114	233.4801561	233.8522888	225.0087115	233.9416704	223.518178	227.5445191	221.6332228
299.9492894	271.880912	273.7952824	265.0554366	259.9773821	254.4119422	241.1085429	250.3490857	247.4254851	248.8500452
263.0167642	250.8323765	251.291594	247.9362468	247.8073637	239.0666499	244.7037885	246.1253083	245.5498201	235.5578849
266.4589618	246.3241699	239.3949856	246.6205848	245.1945274	246.8255822	242.1526347	249.3287806	252.376346	249.6805606
293.8293282	272.2208985	252.9010239	254.9629782	262.7038258	264.7640043	266.7491222	258.5156511	262.5013898	258.9899629
276.2911652	271.305053	272.1814741	264.3163764	262.5050184	262.1869948	264.0218372	259.9775532	264.3967767	261.4195385
273.2854641	250.0960082	248.0433045	243.2175864	245.4841027	248.1020017	250.2181035	238.9460829	243.3808512	241.2342304
281.3734906	250.9863248	244.5856063	237.0085882	238.1648866	244.3565679	232.1611076	232.7323916	231.2504725	237.0540132
301.6001351	274.9958009	264.5033644	280.8226111	287.564612	285.1693155	288.4970038	273.5948083	276.5584097	274.4921591
256.2237702	220.7303373	223.2968353	229.4005499	229.7224402	227.7862015	219.6402049	222.9727015	223.92997	223.6476437
267.0982578	231.7928199	235.2084174	237.639073	233.505327	230.9574071	222.1576141	217.0018789	197.9979131	206.1288432
264.8433347	252.993863	256.5598581	258.8785364	257.3276753	262.6554992	264.2860949	251.0938979	251.5979676	249.1712866
285.1009217	255.7843276	253.2280285	256.5816294	252.6224229	250.9228939	252.4640553	249.7061614	254.2660158	246.6947168
290.6695371	268.9798479	263.8318862	264.1983441	262.8907767	258.854592	259.466051	258.8134092	257.8724972	251.6427359
272.5831941	237.5755962	231.5184409	225.9145244	230.3425331	231.334475	229.4520364	223.2606061	215.8029539	225.7490063
300.6567077	272.2695498	268.1650843	270.77423	269.3584519	265.1733436	268.4052291	266.1610508	260.7920975	261.2863462
267.2769529	223.0949784	228.2125188	236.7764698	232.6235332	227.3345004	233.4338874	226.2175319	230.3014536	230.5472027
281.3061165	253.4260585	249.9969268	246.6679394	246.5160274	244.1054962	244.8467952	234.2639362	232.7211245	233.811166
269.8130171	255.7110425	253.3798662	250.4921706	250.2152334	255.5372932	250.4376767	250.3112737	252.1249823	249.6159096
260.511026	235.5388033	233.1429979	230.4783826	232.2802219	229.1165822	216.8813545	222.1996215	226.7707094	216.6063696
253.2247395	236.9448216	247.5004622	238.818822	233.3622619	241.3894447	239.2264027	223.9702015	226.2950668	229.9029843
272.6802869	239.314908	243.8257346	249.1382778	247.40999	240.3953418	253.0616876	225.8771029	224.3195719	223.6034144
279.9361213	246.5058814	243.8026299	242.9243644	238.7324411	237.821002	238.8753639	224.4194041	219.9675606	226.380738
285.6675316	258.3180898	260.5644402	256.6700141	255.8928087	246.1177417	258.1779544	244.20583	245.1749612	249.3396217
272.9699648	254.9610179	262.5314697	262.2446741	260.0813761	257.5881029	265.2376727	257.3248304	256.5567308	262.0755494
283.4982511	248.8616017	245.9480405	249.7500632	255.6427389	248.4378966	250.2974571	236.9356891	237.3831481	227.5419095
265.7846953	257.2023762	261.757897	256.1576838	252.1840333	252.1574836	259.5286775	254.4178189	258.4254076	251.7604026
275.5515722	275.5568938	274.8266367	276.3260735	275.0567533	268.9696815	276.7770085	269.0429152	274.2574984	260.9635564
300.4052563	280.6951749	280.5406509	279.3957907	279.7532021	272.9698712	281.563225	272.4366714	275.4981883	272.0934834
291.634267	273.7053808	275.1961323	273.4766963	275.8164539	276.9760696	279.7367657	268.5333299	249.2997569	265.7774192
294.3616351	281.7017826	268.8853961	268.4152842	266.5095928	263.3720853	263.1491848	228.9029726	232.3174059	228.2747552
278.9548116	255.4377802	251.142361	248.1060841	247.4280346	249.2134515	240.5040989	242.3634155	247.5405792	243.3876842
261.7427472	259.1872121	255.4355602	247.7854416	242.6207729	236.0409225	249.8820137	252.8041737	252.1868394	251.4448451
279.9361213	248.3301622	244.607502	244.1123959	243.5680184	248.9192993	248.7102204	251.4142032	255.7903839	252.4082621
274.9063986	246.5956367	243.6819775	245.6623839	243.2659205	242.1239733	253.4670703	245.7846152	245.7773077	249.4800997
280.7499598	247.8736744	247.8154226	240.1489799	240.176532	234.7141033	238.8674513	239.2447432	244.7632832	236.1131445
304.1424231	274.7119692	278.5452119	272.4303957	270.8796679	253.7900947	256.9578827	250.8445372	253.5217338	254.8105369
291.2726901	251.8470775	243.1379762	238.7184063	239.8048085	244.1544806	240.9456381	236.6918817	235.8051725	238.7285553
274.0182577	264.9212937	257.8701009	249.0992131	248.4607674	247.9525812	250.5913921	239.014817	238.2339505	240.9989707
271.8295525	225.2503771	225.1928457	227.3376272	224.4904561	220.6675232	212.755051	196.6684228	199.2884543	192.2926037
294.3616351	261.1474846	262.4094839	265.754698	261.0397905	245.9005487	267.7125626	251.9024791	252.3751934	251.7620931
261.291765	239.7733466	244.5898644	235.1583307	231.0443194	230.9597375	221.387157	219.6258584	220.5380089	218.521342
308.4468583	280.879423	280.3408223	272.4907821	275.5512743	275.6208621	270.4787874	257.1079385	260.2270952	258.4381063
242.0490831	222.2637164	212.8114099	202.6484022	207.596693	211.3892926	211.0556715	209.9904534	210.220852	214.2553923
281.8354312	246.8366434	245.8623267	245.877975	249.3202689	244.2927235	240.6305413	237.0172096	240.2875226	231.7180017
283.0769816	263.5705253	269.2461705	271.7630734	266.2268111	271.6208223	270.8325369	268.9142627	270.9623091	272.6359579
280.3050061	277.3398409	275.1832625	266.9885653	265.0172538	269.8344029	258.6739957	253.2886114	256.8302664	257.6405241
285.6675316	266.4840334	248.3693211	255.3494913	257.3102547	259.5646995	234.713829	237.7793095	237.1837984	238.3304419
286.7315179	275.1815584	265.8068228	263.0585762	266.1420227	259.7559499	260.3552303	250.6300277	245.6926551	250.2542427
258.8993275	232.0010991	229.9726897	222.4529975	221.358352	216.2635107	215.2223596	219.1484572	224.4133366	223.5299767
271.1524737	251.7376171	248.6600051	248.1710627	243.9196011	251.928456	251.827334	254.7977933	255.9290125	255.1764556
283.0890093	243.7467786	242.8369464	242.0068892	238.8938318	225.244414	215.7601056	214.9124262	217.8184589	217.159396
298.1565399	284.6661669	268.3602888	266.6737099	277.0498185	261.2373519	277.9537035	270.3777268	263.4182404	267.8732898
270.9509198	266.0066237	256.9487081	251.242208	259.0073167	261.6565664	263.9227948	252.8689146	251.2890549	244.8755567
286.6081348	250.7637004	240.4913339	250.9200959	257.5129112	249.6562804	255.1985422	245.4637897	250.5205152	239.8973579
267.2905921	236.9330983	237.7431323	245.3989603	240.2084402	232.139272	240.120751	229.3798773	233.917421	232.581854
279.4316611	251.2459365	248.7639188	254.7346503	259.1388874	250.8302284	248.8577937	250.813565	255.6398106	237.272519
277.1737106	259.4108575	262.0911759	261.0614299	260.6888609	258.2639007	262.5840791	248.0570902	239.9490611	249.4964402
279.7462884	259.3091118	257.7358762	258.0022786	259.015632	261.0953617	237.9672775	235.7873198	236.8747876	229.4289256
277.3939744	244.3612816	226.8838322	225.4812648	236.0878224	238.6704319	236.7906127	234.6051527	228.6287714	227.0449131
269.8680476	240.2343222	237.8954115	234.2709621	231.9651497	225.5906425	220.0926173	223.0564928	223.983845	217.243721
275.4266081	252.9629908	252.6144596	257.295336	254.4837424	255.5907098	256.594877	249.5502181	246.0483677	250.6210145
276.8096926	243.6066069	230.4331873	232.4372704	232.3154783	228.8750586	229.9136391	230.7935841	229.7549844	227.8927307
271.8192931	230.0898527	230.0566514	227.1757993	223.1351566	224.732732	212.6512196	204.5783386	206.4359836	208.324864
279.8316692	247.5138438	242.7417708	241.709248	242.2353132	243.4525891	241.7646634	234.8219043	234.9612483	236.7594198
301.1984001	284.3461652	282.9622737	277.2288902	272.8448594	253.7227911	258.560715	256.7697441	254.5714227	256.2739237
274.5502953	250.5128113	251.9878644	253.3657312	251.892619	245.9463778	245.0975092	240.7957135	221.2145286	244.3343046
281.2728642	268.4197494	269.905846	269.9463007	266.7355424	261.4968792	268.6193023	261.5595163	256.5369692	255.0185903
275.0252554	243.8545433	246.8574894	247.3071652	247.0573576	238.0209128	245.1327513	227.3565114	226.2977007	219.5911831
270.9629726	250.9332827	250.7704022	253.3985865	250.772661	244.7078632	252.2160885	242.6200512	242.0807605	244.4346499
277.8050214	257.8046273	259.7953997	256.5002313	255.9900802	246.39432	232.191675	235.6471818	239.992537	239.6169362
254.1030609	220.4987397	211.3641728	224.6918361	223.3548148	226.0226078	215.41177	206.3047259	184.1217867	184.4852781
274.001406	256.9841635	254.8833081	249.8261089	250.3430711	245.9286729	249.6215502	238.5744083	239.5173184	237.0952938
263.6831759	243.0693983	221.4813595	233.5425453	230.6256853	235.1657316	232.0813603	234.6253184	226.2097734	227.5474004
269.8680476	267.3756079	271.0841876	261.4132485	258.6942849	253.0072872	259.4232337	247.5270386	247.5813701	241.6495554
283.2279609	261.5746751	251.4129193	254.9584795	257.622153	261.1616134	260.501167	257.5209817	255.6557699	259.8449957
255.4813319	237.8995866	240.8567563	241.5964739	238.0048561	240.1938714	233.9247853	240.5220621	238.3099349	244.0467217
291.4524251	260.8462349	255.7910904	254.0909627	260.7458952	258.5835831	263.8757478	261.4951062	264.3162069	263.7806961
313.3622843	299.2930695	300.6030496	298.2498201	299.4100317	292.0660037	292.9816824	274.8284199	272.5413737	273.4741948
248.8858463	215.9391557	201.341795	214.178409	208.4703493	214.7136846	214.3603675	211.4308878	196.8316656	207.2909632
286.9822828	277.5349246	269.2412373	271.0419806	274.8211022	261.3314649	274.0610249	256.0741538	255.1384654	256.9760937
282.6449111	265.2236589	269.7077431	269.6645843	268.8177119	268.4265489	263.7805755	263.5486018	266.5176943	263.2678815
300.0290559	281.1641567	285.7695051	286.0789994	282.8990449	277.7201757	282.2882668	265.6219084	267.9976119	265.2610867
288.0794493	262.9513521	250.4764895	249.4955121	248.4057259	247.9055282	253.5675151	246.1236783	243.4390705	248.5606042
258.8993275	235.4649484	236.8007242	229.6308531	227.5337237	234.9602114	229.7445406	228.5499892	220.947936	229.5477963
275.8264231	252.0298295	253.347328	261.3647018	257.2752798	249.470045	231.9383265	236.2284682	241.3470511	232.475659
273.8020939	239.9752791	233.1903746	227.3358338	232.4352974	234.1878527	233.9940218	232.8992626	238.8990066	235.098802
285.0778234	254.6969123	241.9748379	248.3718358	249.151515	245.762143	253.0169781	243.568775	247.8792932	245.2029746
278.9695677	242.7126185	235.7681735	244.5002744	241.4810037	232.4501161	232.4884383	205.4235684	208.8134654	199.3668853
288.5703653	270.8187892	276.8875247	273.9087743	270.5558531	267.7999353	267.5621213	256.9030565	262.0539021	254.4498396
268.0627227	224.5072407	228.3010975	220.6383646	219.7828726	224.3967734	230.187947	221.3478818	226.8210569	215.4042373
269.3813041	239.7222328	240.8193277	246.6810388	244.2232058	224.782962	237.4485518	222.0352086	218.5423789	219.391942
278.2584449	260.6427463	245.9591468	255.2683354	254.868483	244.6444715	252.4746227	252.167778	246.3497284	251.8920352
266.1594608	250.14944	258.1235371	252.8312811	248.2622761	246.568346	236.6304271	240.3872839	242.4996046	239.0242775
274.7409178	253.8345029	240.6101626	258.0389128	264.1266367	267.6200674	264.0942035	266.3476006	263.7439272	261.6378822
289.8849601	270.4184916	270.6744544	267.7037988	270.211534	266.6327672	267.293959	261.9851931	262.7851711	257.9351146
283.0938363	272.2685987	275.9283498	277.082119	276.4910167	277.4510759	267.477863	269.1904089	274.3018558	269.3161019
247.3563014	227.4504369	223.124758	227.5889879	222.8202818	219.5029625	216.4907032	220.9429373	225.1359481	217.266206
280.1285833	251.6014002	243.5602833	252.672079	255.731872	259.7410279	253.2619295	253.4324602	258.3179243	252.0928484
258.5308424	216.5083612	189.8658549	187.2394455	212.6086572	212.3114265	195.5593085	198.0164504	201.5773745	202.3363626
303.1670135	260.3477697	240.0612643	237.164243	254.6440902	253.1120606	252.3288548	228.8241257	232.2193019	229.7899577
266.7954857	241.2408704	224.5095357	243.9466704	238.3290147	246.3115912	245.05219	241.2496646	238.2434942	245.6576717
273.9532163	265.8756691	274.8642036	267.9990976	262.2501645	254.9909138	268.9187921	247.7406592	250.7854534	249.9305327
293.9286918	263.1835644	269.1680912	266.5816648	265.7806237	254.089147	258.7919573	243.6459709	247.1794755	248.9030451
250.7996388	239.9218366	240.7630458	242.7971424	236.9821259	241.8076288	242.7197438	244.1557283	248.1940788	244.967344
269.7038962	238.2567792	244.3590329	243.4331455	238.1658061	242.9332626	232.302904	238.8339268	240.5409334	226.6250662
259.2887867	227.5250692	222.789413	236.3121631	231.2361912	235.9584367	234.5904846	228.3694776	231.7377036	224.3184659
290.7489969	271.8284173	270.6868351	271.9789968	268.6136339	262.1616852	263.4520045	263.3390809	262.2973394	260.9974929
263.5760046	253.0169537	242.8437973	250.3450066	250.9415294	253.3538533	259.2338461	244.8551685	249.7302237	248.920528
281.789958	276.909254	270.1691288	271.4277848	273.5179154	268.7920807	277.6253226	266.4468156	260.0392388	266.3875194
271.4788766	246.8702335	247.4184152	245.2535412	247.8282082	239.4798546	241.3847537	234.6630181	236.4993519	234.7906044
270.8893604	245.7903054	240.5176459	249.68876	248.1966144	246.8619412	233.719118	237.101319	240.0542759	217.204869
296.4917373	263.9727945	252.2454215	266.4804177	265.9315712	253.1196597	268.7132249	251.4660008	255.1138209	245.44998
274.3848644	260.6537494	257.9908709	256.6843026	252.9327534	250.4202467	244.7335274	242.7145046	243.25323	235.4428538
285.7919658	249.913769	249.4108219	249.1661697	248.7238363	248.4822759	252.5042111	240.2577435	240.9668992	237.5469783
285.5542905	244.3064746	244.0925866	239.2469982	234.0132865	223.1739388	230.1600665	227.0971627	220.8352903	227.2397021
268.149196	242.6824637	219.7852502	236.923525	245.459036	237.0219018	244.8511155	236.1448482	237.4823673	235.591904
285.7052697	264.413789	268.6753452	265.8593231	265.6426941	258.4037846	257.4737747	245.828295	245.3194112	245.8684022
277.7684942	240.404465	236.2183228	240.0864918	237.8646869	232.9147824	238.0643796	238.8257594	240.1528177	235.468171
263.1469766	238.4774018	247.6419894	245.8906601	241.0084623	244.0921253	239.087002	236.2330168	234.5491738	239.602016
266.4597278	241.6292018	236.0234376	229.3494308	232.5032621	235.6547924	237.7735028	233.7941656	227.9821991	231.3261269
300.9653606	276.957728	278.113398	269.8906125	265.6685366	266.20447	260.0550045	233.4326136	236.1982588	236.7533479
262.7619088	233.5891094	230.133219	244.1865727	245.3284406	247.3317992	249.5810345	240.1898454	244.2124447	239.4291591
251.6017503	214.5909873	220.4853205	221.2328903	220.2535341	217.616157	225.9145141	210.0919598	208.0042012	214.3213215
266.6512752	252.0599137	252.44049	251.858243	247.8264821	237.6120863	245.4148081	238.7971513	238.0634874	238.6733477
254.2935646	252.1219197	256.7534186	253.2437985	248.7661801	246.8879059	250.5224432	247.5100753	249.6439689	247.4126425
281.5095803	249.3333577	253.3380985	255.9487196	252.0448444	250.0367069	240.2284459	238.6770996	238.9084799	228.8475398
282.8134599	247.6445316	252.4410975	249.7685896	244.648358	223.2978004	241.2147277	224.2263573	213.1343455	222.9848038
268.7311402	245.6257866	246.333562	250.0011809	248.9000988	248.2560497	255.841918	242.3228721	240.0164425	242.3257608
284.8144589	266.929067	261.0094751	259.8790795	259.6723242	261.1390242	243.5582539	219.8481327	219.192974	224.815938
272.0741901	253.1254071	254.3974288	249.2417744	248.7505983	249.3654317	248.505715	249.1197893	254.1445271	253.0716708
290.3976123	265.1389706	265.7999931	259.060761	259.0264912	249.8801201	260.2726699	250.3457035	255.7195076	249.7605802
269.2529499	244.3123109	246.0513313	243.0052762	238.48125	237.6660945	247.7670462	234.3699214	235.5912903	238.2070531
294.4707258	275.7153401	269.5020721	280.8545387	279.0356849	279.1960041	278.5312995	273.9711953	275.0659646	267.5493847
265.3502896	260.1306918	262.7891086	253.2025062	249.7382295	254.7422621	252.2465096	246.1463385	249.0491747	233.0259756
256.3128867	253.3183422	252.703884	246.5309452	245.0608783	250.3476627	245.6278364	244.4492805	239.1747615	247.6687431
303.5705155	276.7835418	279.2589608	277.8607558	278.7222602	267.56569	288.3143302	269.1357274	266.8122821	272.0730292
266.4348421	257.322563	244.2311412	252.8491157	255.4876136	245.7667047	248.1108267	247.933102	250.62593	242.4260876
266.8675675	244.3837531	251.5329393	248.9716164	246.1891729	248.9930237	246.9162865	250.0886761	254.935141	247.2675673
263.3973096	234.4718572	228.0126985	218.6996533	217.8535435	213.6343617	225.5897315	215.0600472	214.7009262	210.4772046
290.9842648	284.0275137	282.102823	281.0871382	283.2948473	268.1327002	288.2315846	276.866449	279.4212302	280.3863218
265.3502896	256.9241515	246.6191633	242.211762	242.5621851	243.3335927	246.2631548	246.2718477	246.8521882	251.3227869
270.9629726	234.5306059	226.2653384	219.4343552	223.267686	222.1932074	225.3402898	209.1396587	213.915232	213.9983237
265.5531986	228.738529	222.3012239	216.0223782	211.3668719	221.2561665	209.0166004	212.0576303	211.8122502	215.0769047
255.907314	216.0239922	219.6369901	217.6366139	212.3765687	211.7876178	207.1093522	207.2345859	211.8869316	210.4818156
279.4121705	254.8308098	246.7394919	245.0253812	251.564295	249.7629683	261.391701	250.1693458	254.0091016	252.3064521
263.4194365	232.9760119	223.7847326	225.7913783	234.1059898	242.4647689	241.2978538	230.7080867	235.4266013	233.4178769
270.066076	244.3463047	246.5257415	240.6933243	237.6621921	238.2856774	232.5799741	231.9379908	235.6943952	234.2925013
289.5560151	280.69026	282.5202001	283.949691	282.9452322	277.4779783	288.6985848	280.3040439	270.8458645	274.1010897
273.7902643	263.4343767	259.7086081	255.8763925	255.1013292	253.9693719	237.795773	236.6671648	239.393377	233.1933781
300.6174895	270.3899179	273.4050254	275.358027	272.440744	269.2940683	265.1625584	254.9388808	249.2620427	259.4154162
275.347075	247.480535	254.5635237	248.7308552	244.3405484	237.257999	246.6361123	225.6935348	224.5600148	227.6159286
277.7684942	254.8459757	227.4892013	227.0000294	255.2818535	262.6874376	258.0287926	245.9042408	245.4305189	233.004087
269.0366576	245.2684563	248.7138941	252.6465662	249.3364868	231.1745996	243.7363923	215.7263724	221.5627997	219.5668436
280.3023849	257.5429494	257.0154785	254.0630623	258.5266605	260.6389057	258.2100273	254.5782232	258.9288894	260.1564392
285.4669404	273.4622655	279.2616387	278.9809396	275.0014389	277.150602	272.3109796	276.2391054	280.5863852	277.1341338
276.8024359	264.4708349	258.745236	255.7288611	257.369323	262.46647	259.1002155	248.5803496	214.4129064	238.5560608
265.7793176	259.6959022	254.9445986	245.9652929	245.6825448	245.1263233	246.6136304	238.8621796	243.5368043	241.5850066
280.6475228	249.5211551	227.0094709	235.155038	248.6726422	249.3471354	237.6477113	251.7821709	247.5538003	254.8266361
276.0642036	253.5170897	259.9012025	252.1166044	246.8635973	243.4600869	239.7434878	233.0694323	232.8765723	230.064982
273.2314197	242.3478197	244.541322	245.6512064	243.3267568	247.5520215	251.8103182	249.9242116	252.2612027	253.9759471
269.9783246	263.638515	259.4936082	254.315261	255.0564078	257.9291384	256.1556605	247.0809997	249.5483415	244.5800767
258.5308424	222.7888044	225.5618482	219.4476117	217.2999512	209.1932966	204.933203	203.5965916	206.823542	205.1107165
294.400099	290.0923368	289.7330046	282.2681021	279.4220747	281.7044467	264.5889977	265.1473031	263.0600052	267.2975141
279.8316692	251.2664052	244.5956077	237.4796903	243.2741084	242.3257262	246.0109881	238.5205793	243.8786686	243.7812099
275.1411247	277.2409066	273.2890356	262.1979122	259.6254245	258.5822965	244.6850267	248.2730471	239.4693697	243.2578853
286.7775833	265.7318398	263.1750812	256.5784739	253.4403357	257.9110195	256.2907121	250.0298976	251.9648143	247.4475233
285.2560476	249.4472939	248.5922887	246.8096413	251.4156001	245.3137928	249.5464566	232.4607023	231.2456747	227.867566
278.9695677	254.8488216	257.5766429	252.5137346	253.1631264	248.0509783	250.4617844	239.9579071	243.0628121	243.4380976
289.3760092	253.0381614	249.4775175	256.6834265	258.6770656	251.8677335	260.895878	243.147163	247.4298601	246.352826
278.4306272	240.7008759	212.3008056	218.3034125	230.6535491	225.6892799	234.3545511	226.5503515	231.9223699	231.2681335
266.4271802	247.9904279	233.9197627	230.4983172	228.0664141	235.7383174	223.3883119	225.6938999	222.6630951	226.7105395
285.6675316	256.4939205	259.0488617	254.3420566	250.1196526	254.4292029	248.5247681	240.5577672	242.2422296	240.6951025
278.8701098	259.8997774	268.4348892	273.6819656	271.0152832	264.4914069	277.2870764	258.3873583	256.8786906	257.5683222
286.2850288	265.6861816	270.7197067	268.8575578	264.4588758	254.8357706	238.3036385	239.0901882	243.6309191	240.7199497
268.5376829	223.2888379	214.513269	232.6461721	228.4696714	225.2564867	223.1047004	224.1293329	227.1249968	225.9673227
294.0811511	258.1700032	247.1104838	258.4016901	265.4039542	257.4721788	269.8989933	251.6381449	257.0967597	251.3354717
277.1737106	249.6546299	248.8202955	242.2960052	239.6378076	231.2769741	237.6400488	223.0141813	223.1056158	225.7296126
267.7201681	258.5864129	253.7039828	251.4562943	251.1770067	255.05976	255.9262424	251.7492802	255.0946732	256.53973
254.4473934	221.8312508	220.8162383	226.6538477	221.4271879	220.1605981	212.9036103	212.4060342	212.515303	212.095655
283.1902228	265.3195596	259.859689	251.6606166	253.2496081	256.7728975	260.4902013	251.9406735	254.9990485	255.7675856
262.9142065	233.3301262	229.9478678	219.9373302	229.0072552	238.2611296	232.7363787	233.9366062	231.8620506	234.6630875
273.6993325	236.3752994	227.7360255	227.8540564	228.9298416	232.5305649	208.8863594	214.6375606	218.058722	214.4110602
270.066076	225.8294342	228.8065155	234.5084054	232.2953477	236.1674232	242.5592535	232.7496776	230.3946132	235.6706209
275.3323635	255.1608189	254.2194444	257.1239125	257.7162159	262.9908611	261.3073619	245.0649031	249.8744943	244.1586624
281.8354312	245.7062745	247.1976458	253.1374401	253.8732294	248.3543475	246.3011578	241.8281391	247.0689945	245.271979
282.6338039	243.5983231	242.8733617	242.2604364	237.4005204	237.0729399	237.1482375	237.9828458	238.9995454	240.7102315
292.5885493	265.0259269	261.2881796	261.9032837	263.907452	262.0736483	246.0707404	249.2680278	248.7304028	249.4637591
287.78578	277.9228173	275.7321476	266.7502063	270.1347365	270.951036	264.4981953	253.1336974	257.6562209	248.7045346
253.5331775	223.7567475	233.0088406	224.0241725	228.7129856	237.3262537	230.6254559	228.0219227	233.6652188	233.6954085
282.0890326	230.9571853	225.685523	221.5406638	218.9626886	215.1987824	212.5095061	211.9368618	205.7210797	212.5789363
273.5310531	253.4321141	240.7577975	249.7323235	245.562247	242.9202418	239.8384607	235.9623614	238.7726852	239.3316205
306.3970902	289.5026043	272.0590271	270.6817056	278.4862678	280.1753375	277.1145439	268.7946809	268.8007992	268.3936422
249.0371602	213.1821423	203.4678467	194.0103812	198.890232	206.7712538	208.2475551	205.9515189	211.2806944	211.7682403
276.2182469	262.4144521	261.4124061	253.4831804	253.3763424	250.4054952	251.2543872	240.7406994	238.5155257	236.5026725
292.5065102	275.6173007	256.7602722	262.6249393	259.8852911	261.5788038	261.323709	259.1161799	260.840687	264.7777541
273.2854641	256.7056201	238.041473	245.3964191	246.1807316	245.8994592	252.7011007	252.3615432	248.697147	251.1582613
284.8920238	260.2035801	251.4500453	246.6604774	243.0774012	248.4603189	241.6684462	242.7175096	246.8949171	246.2527259
295.6346063	258.1315686	262.9737865	257.097351	255.4321632	253.378553	253.956452	245.6512052	248.3053041	248.6376286
262.3554094	249.6478171	243.8717618	236.8955503	239.1400603	245.9590779	241.9316055	237.0108666	224.15123	235.5467031
269.9783246	250.0844192	255.8758323	250.6021927	247.0020563	242.0347927	237.8802328	227.9795032	216.8043784	232.2074945
257.4695219	237.1042555	222.4698846	218.6738609	222.6761326	229.5712475	218.4295119	222.1979298	220.348801	221.5511363
280.6475228	277.3592389	275.2848977	276.4653214	272.5589973	268.8314364	264.8044953	237.7776489	239.3878636	241.8311151
302.8942071	275.9004959	275.2467678	271.5005651	268.8340413	255.3928931	257.3649081	251.5157809	254.1429551	243.8069503
299.5568422	274.0900812	272.3858209	266.6621707	265.8301495	259.4524966	267.636838	257.5638428	250.859057	261.6539604
278.2584449	229.4816571	225.1074084	220.8306879	221.6222513	213.2701102	229.4721643	212.3950095	213.5298817	214.8287776
274.2816647	228.9751697	225.2779194	218.7522443	221.9591558	217.3109186	230.5246953	214.474319	200.3780352	218.2956123
290.2222664	278.7703587	272.7381291	285.2294143	285.1035058	285.618787	285.1215657	277.6873125	275.2111943	278.2146781
276.0642036	207.6537833	212.7304002	209.6981304	205.7682661	212.0645571	204.5874777	204.0295754	203.4147163	196.3713132
270.7956762	223.938836	220.7882091	229.6478374	231.4063043	229.3500689	240.3819658	228.4114337	232.0883714	227.5321916
267.0504075	229.4364343	230.4116252	234.6070262	233.3737907	232.5895629	232.0181943	231.670617	228.9470131	235.5903961
289.5292665	269.9147677	273.3346159	264.9151175	260.8743497	264.2233711	251.7121801	242.2226162	241.2138701	218.1997546
258.2315654	234.5297614	228.7275098	231.296346	229.3713167	228.3966537	235.1771296	231.4520698	226.1455928	231.1137814
263.6831759	248.8011258	239.4255532	231.6098676	228.155356	225.7666026	224.6321845	219.8167095	222.8355968	213.9636394
262.5667185	239.2593744	236.2068461	243.309642	243.600186	248.6935404	241.8272888	229.5069455	232.3104747	234.9015461
280.5020191	231.9347952	223.9171445	220.2523672	223.7875392	215.5361343	221.3945096	208.2689842	211.401832	208.5465112
276.610935	254.7974001	251.797584	254.7089284	252.21525	253.2860855	251.1674221	248.2959372	244.5351213	243.149045
283.7213341	260.0653194	253.608104	257.8606145	261.4449418	256.8040303	268.4491439	251.7802962	252.8920115	254.2290825
284.8920238	244.7515774	240.0836112	230.2601805	231.4976981	232.5483239	229.8541215	220.9320133	215.1541675	219.858005
277.5453907	235.0571383	231.4580798	239.819799	241.2739605	244.4566392	247.0997157	240.4925256	239.682003	230.3471872
291.2726901	260.5173861	268.9932954	273.7131392	270.2038096	264.4912575	276.7128606	258.4907997	249.8815656	254.8901268
275.1244808	252.0486093	243.0938532	245.6975167	246.478941	246.7223856	230.1261974	230.7797915	232.3457827	232.5774219
283.1260484	243.4657503	238.3126443	248.7982439	250.4768085	250.9049867	241.0441323	248.2586561	245.7876404	248.0348233
293.012097	280.0665637	282.6173105	276.2893694	277.494038	268.2588572	280.5119094	270.8952452	275.1982693	267.947553
284.609481	264.8550313	252.2373624	256.3565808	256.575003	258.5984005	259.4688153	253.9583444	251.1022033	256.348363
253.2749022	217.747685	184.8896084	207.923965	211.9828882	211.4634316	198.9683907	209.3369085	200.2553311	202.2182516
272.3652597	252.9259568	255.2253555	253.6751887	254.3996456	254.5756474	264.5353607	256.1909953	258.7249903	259.2937809
254.2819457	212.6601469	213.6469732	214.9048146	215.0786205	222.5476921	219.6434902	215.4793505	212.557157	209.550281
283.0890093	254.5695654	235.0452837	245.1860117	258.9945051	259.0258713	236.2519864	231.1025395	235.801268	231.0241196
266.5374976	250.5539786	244.4566949	243.7068822	245.3362197	231.3847914	253.2333877	232.0028856	232.4102269	233.0768066
243.0505614	222.7187704	217.2761298	216.5207063	213.7498346	217.9060286	218.0456553	217.2660233	218.1210279	219.3735436
274.1361781	255.5340429	250.6459683	249.8999123	251.5427587	245.0322585	247.7644448	240.154607	240.5616951	237.9351988
267.3980363	231.5063426	227.7464098	235.1264116	234.587257	232.0292623	235.364243	225.4287438	230.0335321	228.7738521
283.4982511	274.245058	275.7160267	268.7015612	263.9780245	263.6015185	266.7934175	258.7516874	249.2950096	260.4247742
272.1504687	247.6215773	247.2115435	259.0456872	261.1173684	253.2439625	262.2970176	248.6671754	250.6217446	244.666291
293.2757632	258.3565324	254.723591	267.9886621	268.281891	254.6625898	266.315546	267.0939488	256.8267648	264.966833
294.2462149	281.2322992	279.8086483	280.4276218	281.9418333	282.3855173	275.8445409	269.7393583	265.7275226	270.4248628
278.4306272	258.6235629	258.1810259	248.2269639	247.4887123	254.0504689	239.7123765	238.847022	239.0446282	234.2944176
302.3521594	278.9716625	266.7850943	262.2719283	266.4533653	260.2113834	267.825902	251.2693795	253.2372587	252.6778875
272.6802869	255.999039	255.7935936	251.8569336	252.4687067	246.6106975	239.9985256	245.032432	248.4106689	241.5618283
263.563647	243.2831463	241.2018724	244.1425318	245.9323021	249.3636987	239.717555	241.3680183	246.0175204	246.4688309
284.7604691	268.1513709	258.6420988	254.9851491	257.5714681	261.8056325	257.147891	254.4123944	253.603317	255.5349938
253.9316014	203.7916907	199.739332	201.5927473	197.7279684	192.8482762	194.632314	189.2096818	176.6619983	182.0456398
284.6676397	260.5669207	266.7709389	268.826387	265.0745823	266.1783496	269.3071695	258.9626793	260.9287371	264.6154282
254.4907098	243.9125319	243.8194021	236.2039893	231.5051109	232.9384303	228.7847182	228.0254853	223.0124132	228.1559719
290.6814295	263.1796212	255.5205264	251.6025927	247.142077	241.8934425	225.3277113	232.7724641	229.7265138	232.1368731
264.8433347	215.2328946	205.5347824	209.6493408	209.3500253	211.6456621	200.8019415	186.8787182	180.8971437	190.4248685
273.8020939	254.2476457	241.3988345	254.2905904	249.5189513	243.7398016	226.769872	220.9656214	222.4776773	224.1816587
305.0855107	257.3991633	257.4683104	262.1474151	260.8635804	258.2712233	255.9626468	248.3679033	251.6205891	252.4812495
282.6449111	238.9011034	236.8630082	233.3657639	231.7072524	226.8749292	232.4236869	226.0325011	225.1439911	225.0063631
272.1504687	243.6358212	220.212352	212.1903843	236.6734877	220.9963722	227.4285537	220.1063588	220.8630091	206.4972222
287.3942628	275.7933693	272.9895669	273.452153	270.8595922	271.0429399	278.7740516	267.9951228	269.985533	272.0180181
300.9680322	273.2256341	272.8628198	269.0374461	267.1374703	266.2268462	254.8466305	262.8986402	266.9438318	264.4254286
272.0273436	233.4054256	215.6080764	236.1303224	231.1128416	232.3645149	235.074731	212.118829	214.6499796	216.5896697
247.1349404	236.5939712	238.4883749	234.1742151	230.3421935	234.7946283	232.8066663	236.3384575	232.5583843	237.2088019
296.8018981	261.1915084	263.8675222	262.9089676	265.5289701	256.0669197	266.6293983	260.0784187	265.2608767	261.5657468
279.6264642	267.7917224	263.6908355	263.7889119	265.2941334	268.7433243	252.9691226	245.8537476	247.3847743	240.9785908
259.2887867	215.649521	214.3341453	210.7401158	208.6364308	209.1975856	215.4169975	206.8664656	208.706827	204.7509093
282.0890326	236.6580588	240.7783275	246.4307817	241.3009363	238.7528578	237.0721365	231.2891985	234.1834036	232.1769885
269.3729292	263.0573823	266.1962818	258.8186905	255.1111895	253.6931275	250.9686789	240.521514	237.5579119	236.8702396
268.8917545	229.1853737	217.4333607	213.1223679	214.6601428	222.8807507	212.492078	221.5002447	222.2950528	221.8173953
283.0938363	262.6483667	265.9357623	259.9438912	255.5417076	247.294185	257.3349198	230.8737956	235.173772	231.0915593
272.2561387	245.0021124	238.6579347	229.2986515	234.0297893	225.938567	233.9740924	234.7942185	237.5756982	233.5832965
312.330021	272.3320002	277.9424803	285.8093883	284.3340586	271.3124989	285.2020047	277.4104423	280.0219241	282.2372465
250.964212	234.6051478	233.3943669	239.4637197	235.6313218	237.713772	234.1128197	232.465244	237.3776435	237.6239969
271.1471113	257.5330093	258.3825722	258.133177	259.3312743	263.6386633	265.2758577	258.0682731	262.0907295	258.5166312
283.0938363	234.4126795	231.6280734	238.9318335	236.6373098	238.8581748	237.0865969	228.4140544	222.9925124	229.7651202
273.2314197	257.1452272	247.4214318	245.2015755	245.2986819	252.6102272	250.7352439	253.0034189	257.4479187	254.7899462
296.5687931	255.2285652	244.69656	241.510941	242.1523208	245.0299804	244.445878	240.7708365	231.2358464	241.7993209
266.3180592	245.0505636	246.9648108	243.8901087	238.4321779	246.3316677	243.2826107	234.1716306	238.8311435	233.2626941
267.003898	253.8285293	250.3988966	243.210916	244.0016122	248.6420657	241.3057058	235.1737186	234.5949086	236.8243906
269.2529499	233.2530412	219.3110588	225.4554622	225.6355388	216.198492	220.724384	221.7041887	225.239525	222.7715331
261.1848257	224.5420662	214.1456775	213.511848	210.2785128	220.1265518	196.759529	197.4275514	194.5649161	193.3292268
296.7429696	254.112457	246.3506857	237.6611534	242.4990116	233.6852227	246.2493103	240.310077	245.3615782	238.1880171
265.7793176	237.3614778	241.0612339	239.4260538	235.5630512	239.6227116	231.9564622	230.4124409	227.380023	229.2116945
277.8050215	259.6545104	254.701187	251.5002613	249.3805185	248.9881282	251.6921588	247.423885	249.6445609	249.1857163
272.2561387	256.7997573	260.2108635	253.6609039	248.6559619	249.5670264	247.6693584	241.8000985	224.381649	232.913692
257.672079	238.3562374	242.508063	243.6343272	238.7260427	231.3993558	227.0281706	206.0182636	210.248226	207.4012311
277.3253785	247.8913446	250.2417786	253.2026828	251.2110934	251.3218021	257.003689	244.9635612	246.4586594	242.5474176
287.0420879	249.9482679	241.4016721	246.2902732	244.4837052	238.8743927	244.914698	223.4730146	219.224758	221.2687932
287.4651217	277.3129759	261.4381194	262.476106	265.5504806	267.0823094	266.696962	266.4375091	262.9747249	265.6919409
251.4771281	225.6015629	215.5152046	227.9994364	225.2411849	221.0703238	219.3517385	224.389799	227.2797043	222.9528831
286.832676	270.2543064	263.6619704	254.5629967	261.2221955	262.6492243	256.3293035	245.906257	250.7649201	248.5240923
263.1469766	256.278119	257.6011606	250.7166519	247.5773417	252.3649342	256.1320635	252.3328911	256.5705751	256.7440098
277.3183826	255.2381469	251.8735173	250.7057349	251.2472581	250.9721349	242.0967722	245.1265404	247.2056825	246.8105717
284.7604691	257.8220306	241.3770449	251.8661792	259.1928296	243.556885	231.6030491	245.2687959	237.5249896	247.055277
264.1279965	218.7219472	205.5762078	201.2701511	196.7480631	199.3049414	194.2942209	196.5100293	199.0889889	196.5102591
269.4339066	260.7532733	265.9826209	263.7336266	258.7184174	260.6926592	258.1309352	253.4759588	256.9628847	253.922717
277.843992	263.6242478	270.3292812	277.9821519	273.8540052	282.6593996	278.0741566	265.7468228	267.0889445	252.8566866
259.2742949	206.5674284	187.4650276	208.144635	219.4761068	223.3379929	209.1453111	205.9468688	192.133478	189.7816618
293.3945011	270.5054999	260.1262113	257.9202053	269.0860596	271.8882208	272.3559321	259.5694809	264.4886582	261.3732229
294.8594298	276.2932092	275.0014308	279.8847299	279.3421592	276.6548744	271.5014438	263.9511644	248.8237383	246.7647609
277.0487616	230.0989494	227.5839801	219.5112467	219.1016827	214.6111735	210.7452177	210.5018482	212.6552035	216.0878245
276.5456242	230.5658861	228.116342	225.9328925	229.8894302	227.4917962	224.9544434	213.4975164	212.4460838	217.422094
263.0167642	243.0262303	217.1943571	227.6621924	235.380524	239.5075312	242.1185512	240.063495	237.862796	243.0186429
273.6993325	253.1899761	260.567441	260.1889841	256.5758949	256.1143382	248.3873434	246.3719462	231.7294557	239.8960559
268.1700777	248.2406267	248.6600807	244.5054113	244.3764554	244.3902617	252.0486411	244.0191051	240.4044294	233.888576
262.3629884	240.5007787	238.3022346	244.5398146	242.6424874	250.1867753	229.9470508	235.5136611	240.3449207	237.0438279
279.8316692	238.1947883	214.0317426	226.2436523	239.9165276	226.4769742	235.9428719	228.4213222	233.2041718	228.5009166
283.7626808	240.6423161	240.7827301	239.9286507	242.5220775	227.5130859	239.3150842	223.2911082	216.2712109	228.6432784
287.3826807	232.1777324	233.6847243	237.1813577	234.4427965	234.4972798	234.1067024	226.8326842	209.2010205	219.1420376
253.5411957	239.0104267	239.7629928	237.0028299	235.9003194	240.3403636	234.2106211	234.5292438	236.7570621	236.3282647
291.3988657	265.1521881	251.3100393	262.2882119	264.8936009	261.5334491	268.8230503	261.4338924	260.3355579	261.0031137
255.646993	233.5599642	239.9606676	238.8263935	237.8222827	226.5865667	244.9705674	237.2298108	241.4211146	240.4278132
280.191242	251.3206538	249.0469919	244.8101264	250.4024658	255.0604619	253.7634739	245.3352894	249.9313856	246.9955433
269.4428829	264.7844849	262.537999	256.8056008	255.4970041	248.5145324	247.3418371	249.931311	239.8941997	250.4168064
265.4209392	248.9660442	254.3070861	258.1576643	254.2200753	256.2418452	255.6001202	246.3559723	230.0789363	243.3307308
260.511026	241.1375274	231.1989549	230.7249467	232.2949914	236.608553	237.093378	232.753253	232.1085054	236.9797829
283.6888967	259.7190326	259.6557528	253.7530092	249.6336915	243.9847882	241.9728417	235.4119863	237.1692641	235.6490992
263.6286521	232.6716654	240.6866067	237.6427788	235.8447283	239.065712	218.8122483	220.9157985	213.6434955	218.718375
282.241492	259.8691917	252.9795921	261.1487634	257.6690237	244.8748132	255.4704012	247.1966732	250.6787812	245.7968118
291.0635517	276.5798929	263.3335713	270.972627	276.8095968	271.3168151	275.4024052	274.2488245	272.0393966	273.200317
283.2809199	219.5445982	216.7806372	230.9122194	227.918055	227.5241669	208.4940188	208.4576506	210.5901786	210.9046558
237.8722841	209.7051272	207.1481891	209.111967	207.076399	217.3535427	217.7811634	215.5145879	220.8627684	211.0964738
286.0048508	276.4578237	278.4634015	272.9537582	270.9042197	270.4476297	275.6684076	267.5759064	269.0025945	270.7321519
272.4205703	255.3082837	239.2304186	246.5781587	247.0987933	244.8482147	245.5017667	239.6704432	236.4095079	243.9345921
274.9558017	234.3243119	216.2054967	218.9408899	220.7318018	221.1781073	224.3642123	223.5845699	223.5868338	223.1525593
248.8858463	219.5613849	217.7946532	215.6951824	211.1562037	215.4270381	204.7820258	197.3051304	199.3590384	200.8663313
276.9532981	238.7064576	240.1658754	248.2956839	247.6819252	239.4798347	250.5604386	244.3416978	246.6810154	244.3975515
272.2001578	262.504438	253.6617247	253.017902	251.3151471	256.5364431	256.744334	253.6433776	252.0579374	258.3560603
288.7699253	260.6805252	258.5129356	252.5964783	255.7021359	252.1296569	252.9031422	242.0272385	246.9899377	240.7385887
294.7566516	269.6489776	265.7569419	266.0268359	265.0272052	250.4792545	269.2634483	255.3452743	255.7473166	247.8642574
290.5298808	266.7494758	261.3863336	252.435263	257.38255	253.8620973	252.6461751	241.2724275	244.1677416	239.3332084
285.1009217	252.5925519	240.2019007	248.4630274	251.0095596	250.9552492	259.114718	249.3102115	246.8395466	254.3226284
279.5158794	251.4830426	241.4366285	242.3317582	238.7640227	242.9786172	235.854075	233.0103433	236.5206914	226.5290668
291.8580288	267.3146903	250.0528055	250.2416708	255.2457389	237.728568	262.8769076	240.5027224	242.1701678	240.8480883
297.7503081	268.4216091	260.4946106	258.1711736	267.7381333	264.2532291	264.8302859	255.6706572	251.8495412	238.1027519
284.7802904	254.9968505	255.757301	259.2184412	254.7801493	249.9308854	239.6796072	236.0310424	236.8608714	240.0030481
275.2736702	253.5706992	236.3143563	252.7416775	248.8572105	244.4551557	229.737318	234.5675786	227.8003322	236.0117095
261.6466851	249.6395991	252.0816914	251.2235161	253.4079334	251.5522329	255.4263601	252.2053422	249.9903794	250.4920568
248.8851906	234.8645945	240.1483188	244.8949855	240.0580603	235.7348804	248.5918508	230.1983865	233.613712	235.7459956
266.4348421	246.2637593	250.160542	249.2847302	245.5388967	252.7411622	252.6152624	247.2646963	252.9291174	249.6370433
260.8134512	221.0053391	227.9623339	230.1916052	225.5547814	221.8293392	214.6916015	215.9641564	221.7570296	211.8654851
280.1120029	256.5557237	253.1790916	250.1374968	249.3509438	250.4620387	240.0919208	231.6907119	234.4437788	229.8888321
287.4651217	250.9917243	241.9620172	243.3152269	242.459696	244.4695908	240.1291486	236.0501031	234.1826748	237.1258305
251.6178685	226.133049	227.2454905	218.2752173	220.5153506	220.6182154	230.4464679	218.1544863	223.8671638	219.0165003
272.7604066	258.5961575	253.9056422	253.9280878	255.4861878	256.8981506	249.637962	251.6000751	252.1584449	252.7089661
268.0092091	252.1483358	260.320316	256.4173559	250.935081	252.7358295	250.6287141	256.2307787	250.4896543	254.4575349
297.0410015	276.1274883	273.9195961	270.0800694	268.7246645	261.334426	256.7751139	242.8384592	247.9233938	242.1768889
268.5951838	238.0842437	231.4706782	224.3939091	226.583191	219.2236082	222.9407585	204.7798599	205.7178078	205.926757
258.8993275	237.171717	236.2380963	233.9035666	230.1850485	238.9062696	234.959717	230.147898	221.2808978	225.1774242
281.6501083	263.4172879	265.2446356	259.55449	258.0446317	250.1050336	253.7874526	246.6762224	249.4273233	248.41073
269.9783246	266.3859074	267.4299432	259.190657	259.3901926	256.3983222	261.9341526	243.4936552	245.8577148	245.635033
258.0696439	251.7073023	243.3501113	237.8934612	235.0203793	238.2596179	235.983461	239.1000538	240.1282065	237.0363897
274.853897	266.0735292	271.2742374	261.927383	258.7381186	262.6995049	251.0790588	245.6452992	246.0042415	245.9543523
280.2239008	262.5212658	261.7252583	258.8796629	254.9130444	250.1050788	249.8505889	235.8044265	220.0449152	227.8425145
279.5626843	236.9874375	227.9590338	223.0714799	217.3863728	219.9897484	227.9884343	209.7176884	211.7353701	209.2640705
270.021612	256.5973058	255.4956061	257.3189381	254.5968675	247.962107	253.9120365	249.484214	251.7960534	235.1262016
268.5376829	239.0432551	224.07024	239.4576603	233.8640146	236.5405248	229.1132998	215.6568817	213.8664805	216.3828201
265.0281578	242.767161	237.4982201	238.5924502	238.962961	234.7657402	241.4332731	239.5560023	236.951173	235.4118494
310.3442279	274.322596	273.3877098	281.5361662	284.1245814	279.7814285	284.7444239	272.061699	277.1488344	277.1398273
255.9794798	238.3643044	232.4630399	233.3760989	233.5941689	240.8354002	228.0733819	229.4281783	231.8375266	234.8840218
292.6299748	267.9681384	271.4751121	266.7473127	264.7669761	258.4159334	254.1648107	252.0349638	253.2288689	251.6667814
271.8192932	267.8305889	253.7033611	252.1763992	249.8331962	254.8775685	245.7751569	246.3586177	248.3692988	246.958317
276.9532981	256.0263541	253.9431867	249.7176198	246.5293067	248.8255726	245.7726676	245.0686196	243.8004498	248.7944033
271.8954721	238.3841278	225.9173092	223.1676044	226.1456996	230.3043099	225.3241811	220.4094657	214.172648	207.5230569
268.1700777	241.3906343	241.5694155	241.6484403	243.338878	238.6965072	247.6343128	241.6515554	237.0654695	228.6098417
272.2561387	242.3395039	246.8004291	249.3511706	248.4081603	239.3453006	249.0419006	239.9601241	236.380883	243.8631125
253.2749022	233.9219036	238.5150734	237.8021098	237.8909986	235.0656304	242.2810501	234.3084419	231.8175461	230.4777345
278.2584449	254.8583336	248.0410904	242.5795882	253.9360135	256.9708353	246.8705334	246.3538691	242.1280195	246.3189494
260.1399696	244.4089771	229.2302226	237.1392629	238.5253963	235.2798945	245.4691458	236.1238358	240.3168796	234.3185216
269.2670506	252.6022064	247.4921022	243.6828773	242.4478991	245.1192114	244.6010167	245.8710103	244.899255	247.0527496
277.3939744	247.5975523	246.1566665	249.4304793	248.8628553	247.2589941	258.5635279	243.9544797	235.3012093	241.8748129
277.7684942	256.8922447	257.2915009	250.3507568	251.2393837	248.1277738	253.7126411	244.1588428	246.2985591	246.3319535
252.8375599	236.3216017	242.0710454	231.9846586	226.2343369	225.859878	232.5877778	217.0772467	221.1834425	218.4025672
266.8675675	238.9188711	238.109869	239.9171141	235.2171392	234.3626338	229.8805404	228.0407251	219.9199402	229.4527601
271.0899254	246.9751682	249.535637	243.3098194	238.8358579	237.694608	230.1867039	236.3630087	233.1230112	237.3803135
279.1754269	237.1827055	236.7301684	236.1485313	232.5781177	232.286448	220.7123112	223.4281999	226.5932033	222.8680297
265.7793176	220.817884	225.6542788	221.8328425	220.9932282	221.1178472	223.9144143	219.3101763	222.1575778	222.917504
268.149196	245.4595979	249.9090379	253.57267	253.5574397	254.8713636	251.0169455	225.840123	224.3834782	228.3795134
238.435558	203.6652863	205.4923556	211.2496759	207.9122045	210.5199799	210.6137082	210.2171859	204.8625081	207.2390863
306.1797892	253.2557207	246.5503201	240.4143754	241.3700062	245.5825567	244.6306038	236.9754615	235.7192513	231.5813365
238.0701108	217.5714905	216.6823827	211.5505008	210.7949474	207.2262416	212.7614648	217.3651947	218.7618733	207.9690006
280.191242	257.1308095	254.0500327	256.6090721	266.0686095	264.7290431	275.2899635	268.4273224	269.7427652	271.8868431
263.070184	251.9020109	253.2201848	245.1971746	243.4763599	247.2542346	249.2032865	240.3774444	241.0846484	239.299175
259.2887867	218.4390749	225.1552276	220.7705314	219.6276935	219.9284612	206.9961619	209.0656455	204.2643645	212.7840872
280.3023849	239.9540339	233.557941	241.3430595	239.0104595	242.7577896	245.9128714	239.917064	242.3325631	242.9977351
296.0241954	259.211019	254.533219	245.4460922	241.1475853	243.4321194	238.8870096	231.179918	229.4323175	236.562302
291.5740627	266.6560136	257.3163612	260.1107673	260.5943118	268.252841	264.9376153	260.8019704	257.5830851	251.8299251
275.3323635	257.1499291	241.3846821	244.4352613	248.5101782	242.5698703	251.1702572	251.5320985	256.7080398	245.210742
256.3398623	220.8313342	212.3876495	204.0152167	204.3976087	211.3451668	212.9473947	215.3059757	221.2009186	216.2379779
279.6114053	255.845172	251.5137106	245.9202714	250.4808297	246.4765677	250.1185506	223.9034542	228.4590627	229.1594843
287.6086979	265.7537469	272.03969	268.2537633	264.3834257	253.9777906	258.9919453	228.3769513	227.7530872	225.0106414
284.6979486	242.7027811	242.5166024	237.0298086	237.2391491	228.7186105	232.2951184	228.5659794	233.5356284	231.3262547
282.8188756	256.1452831	260.1028103	257.4970235	255.5416689	252.1370666	258.1548215	233.1561287	236.6363711	234.8368998
252.4371571	222.3286644	215.586822	210.239086	216.7911045	213.9290622	209.4962705	200.2484308	202.879853	194.2208485
282.8694523	269.1158068	273.9919229	268.3028959	266.3178599	252.2908581	254.319211	229.9791534	231.2414615	224.5678712
283.0190591	255.9631133	263.1858721	262.4509504	259.5907284	265.2719204	249.0776394	245.607862	241.9966867	239.9619025
281.9703408	257.8611251	250.6260887	269.0597143	265.1304728	266.4027544	267.4316041	259.664058	259.8920207	265.1733176
260.3672194	234.5726017	232.9974402	229.0331423	230.2388936	226.7199068	220.6282738	225.1730819	225.1204308	221.8055194
252.7523043	218.6225823	224.6697105	218.4975297	216.1575717	221.8009045	204.0163824	198.5076697	201.567225	197.9231464
271.2935536	263.5875763	253.6121861	251.5746074	248.7815806	255.4972736	248.8101485	231.8047271	224.8958783	228.2448739
262.8248449	254.5279723	259.9928099	252.5842475	252.4604191	252.7913118	238.5842821	241.9705104	239.9402283	246.9286976
285.7919658	276.273996	281.660594	280.8740143	277.9699459	273.9661188	271.3059959	266.0021869	243.0652571	259.0651795
298.0966469	263.5860475	242.8255378	238.2467785	241.6632879	235.2932182	244.6814055	235.6701517	216.6102247	230.9577084
274.9063986	254.5047832	256.6205886	246.7905317	244.9783955	243.3784613	227.8451395	232.7638541	229.6895455	232.4432047
272.3669018	257.3698599	253.3482024	255.5861699	252.5245248	250.0973012	253.8028051	248.516071	248.6007232	250.0808271
294.7235438	274.114312	253.7451009	250.1564208	261.0094494	252.176481	264.7214851	247.9058674	244.0773416	246.7534557
270.6449445	244.1890649	244.3194672	242.6540062	241.3539258	239.6495765	238.8477538	239.1890695	239.1872791	240.6086311
239.8507782	194.1580863	191.023649	195.7102456	199.1289143	204.2477995	208.0853588	199.9080826	196.9691867	192.1481685
258.8623889	214.1442462	215.8500323	210.5838102	212.2337173	215.0626518	200.8161251	202.1002793	202.8791984	204.7102057
277.6925306	259.1454831	253.6048655	255.7386407	255.4741615	263.4760559	265.5464847	258.7381284	258.9555939	259.5206435
271.4788766	244.481902	243.0812134	240.5541604	235.7651843	241.0989864	240.5754151	240.730678	233.9322887	233.0014447
280.3050061	255.0973321	258.6202945	260.8444972	260.0716539	250.6561535	231.8744839	248.7497927	252.2886095	252.7091305
266.6512752	251.6881918	251.4697686	255.8614961	253.2386227	252.5291901	256.6383136	254.7396479	258.9307559	254.0936386
255.5842188	233.5836884	242.2874617	240.1266763	234.5454097	237.3136387	238.537169	234.1419774	235.4096095	230.6999812
287.646436	259.0349079	257.1852394	257.6793945	257.8656425	252.5133351	246.5575469	241.9175305	227.7242176	242.5066437
268.1700777	244.5922452	236.2814216	236.0330896	237.0643122	242.0132323	235.6619312	232.7596834	231.6103823	233.0095263
268.5795122	234.0954778	238.3512502	241.1116616	236.2560937	240.0181895	237.0490641	239.6651079	231.4381525	234.7522135
252.2944027	235.9854181	237.3408397	228.0693177	223.0452319	226.6708135	229.5856867	233.5000349	239.1537434	234.3020739
286.3465146	270.1618996	268.6538676	262.0219504	263.1059625	265.44442	260.6124294	253.9641521	258.7680928	235.7838464
256.3398623	237.4534428	236.4748394	236.7199267	232.4175859	235.9380383	217.9555208	230.8760023	231.0064136	231.8356597
292.0444014	279.613325	279.327951	274.7854444	276.4810335	263.1745778	279.3876602	274.3033121	274.0986166	279.5478893
281.5095803	274.4294301	271.9237721	268.3533629	268.6403465	267.4642	264.367839	263.7064839	264.8103728	261.1897479
281.5095803	263.2997032	262.4213236	265.056396	263.0453287	252.9148788	249.4476086	245.4602447	250.4463985	245.9941501
252.6421669	242.318832	234.9944344	234.7447275	230.105179	222.7779937	229.3228276	220.6828984	220.1665509	220.0854977
284.5749702	227.9812571	202.7038146	198.0838967	225.7240117	229.6939588	222.1723905	214.0038803	218.8067737	218.8058769
294.7566516	240.1055938	237.3511143	245.9220881	247.8849606	247.7711983	251.9168319	242.6226518	247.4949406	247.7104646
271.8192931	234.4432161	233.2128373	242.6994281	237.1796579	233.7815148	224.0741708	223.0471916	226.3264711	217.9212729
292.1533307	263.0191458	269.449862	259.4460946	255.1372523	248.3745977	249.9608057	247.4896978	252.7097533	249.756099
285.7052697	245.7042325	226.9327875	236.775775	239.5742787	242.1919318	240.7387668	241.8195793	244.1503515	243.1459248
265.8864889	220.017231	208.159239	220.2306653	230.3763096	215.0989297	235.8912936	226.7315125	229.323728	228.8004722
270.878838	254.0719022	250.1657142	244.1937492	238.459025	236.8682936	243.8034812	235.7367979	238.5021666	238.7416205
284.1434652	268.0313333	268.5476534	260.6817546	259.8194221	261.7141715	254.5192826	239.6023792	237.157798	238.5775318
269.9410886	248.8598712	256.1711325	250.9391457	249.2684422	250.9912395	245.3916595	239.2753867	232.07575	236.3432425
257.1513645	218.4155535	220.3014869	226.9178855	221.7756788	221.6833923	214.1996103	216.0614326	217.3843803	220.2269957
261.5607986	261.2618342	254.8023469	245.982619	246.1536077	248.792262	251.811031	252.0472904	253.097966	247.3658386
275.6669078	253.7663027	261.5442682	260.5114865	258.5524045	260.1283991	259.0305856	257.2065217	262.3254135	260.5782672
256.4058776	243.4813882	234.2861671	229.531135	224.8331141	228.3789451	231.975231	229.5200254	220.9416806	215.2834609
265.0281578	210.0335326	213.994489	209.6168299	209.5465068	208.1295011	193.5716493	196.5419884	199.3545292	200.1733871
286.0306108	267.8345099	252.6666341	260.4813006	270.094709	274.2948805	277.1729195	270.814322	274.3747976	270.0084699
289.0719914	254.3154816	250.7350545	254.5418564	258.7357322	255.3482345	258.9843648	250.0218987	254.5512841	250.0503257
292.240151	242.2690172	228.8401837	239.8885716	244.4027125	232.5469586	247.2010204	205.3303155	210.0336732	200.0455179
279.4316611	243.1289197	247.2740695	255.4187392	251.2264605	251.4317815	254.1580551	242.8130115	247.8419896	246.9363936
262.8248449	229.6627199	226.3630895	227.3987169	223.9043799	228.727099	216.1796464	219.8907633	225.3828325	222.8426346
241.1060567	217.1527104	221.5685129	218.6762201	215.0213107	203.7592866	220.4118883	221.3562007	223.2837961	217.0779293
275.2494891	251.4492963	249.2625811	250.47032	254.3067306	243.711212	245.5643836	237.9431145	243.0235126	236.8131582
291.5977423	271.4622653	272.2917207	275.548053	271.6961555	269.0392173	264.6277732	258.5534564	256.4126661	256.7056556
279.1759576	260.5396006	241.4556135	235.8216256	255.4878183	258.2488999	258.8805899	254.8866988	256.0254685	257.9560974
314.9163966	287.3243444	269.9328601	272.033634	285.6932927	283.083633	287.6425193	275.0279912	277.9566438	274.2308502
297.4772059	266.8992383	261.2867313	254.9049015	259.0493223	253.0478841	244.4803018	244.7108827	234.3388097	239.8723324
245.7270164	227.3174254	220.4509298	210.5641475	220.1073179	223.1769949	223.3390798	225.26222	230.0589349	223.8436258
278.1204632	236.4245065	235.5954732	231.237646	232.0284416	232.2065744	233.8612948	221.526983	224.5777236	226.173534
262.1429479	255.5873162	246.4450961	248.3410417	248.6246734	243.1231906	251.8038399	251.0330789	251.0748725	248.250777
291.8420142	281.2644346	287.6738924	289.3234571	284.8334672	283.1882442	282.9579089	272.0967275	268.606151	262.9133841
284.8172465	256.5763665	237.6828485	242.2076975	255.4629697	256.3107356	255.4836951	250.7975716	251.8871252	246.1108711
280.3394241	241.9600755	224.2367149	215.4989576	238.8413794	233.010291	241.8565603	235.293948	237.8460684	240.4013729
295.1664461	277.9903344	276.5242064	269.0207007	271.0265508	272.5391628	256.2889396	257.7670335	261.6600438	261.6392413
259.8373196	219.2462675	215.2193399	210.9112043	208.6826506	214.4188684	198.0344193	202.7391236	203.3254617	204.0435133
290.4222504	250.2718263	253.6717558	250.6838103	250.4270358	250.5706144	240.9493176	237.5538999	239.9745481	236.4983329
293.0123947	271.201584	267.8042153	267.4999905	268.7021091	258.6703883	260.8224872	260.5968209	250.0982774	257.5303421
272.4016253	228.0513441	231.5502976	230.9368699	225.2387263	222.5896484	216.6941826	211.9792251	206.4418099	213.273165
246.3544502	216.8827501	210.070676	211.89809	207.6727162	197.0300261	208.1664971	210.7843758	204.0816005	212.0387196
277.7684942	257.1304348	259.0687016	270.096204	267.7877131	256.3037946	267.182915	260.9985832	254.9629816	247.2977946
287.9333485	288.5763099	287.7509366	277.3187734	280.5543313	277.0366345	280.6738029	269.2544133	272.1377502	261.9857939
269.0366576	253.6594326	253.0627752	261.2256138	262.4980178	264.7523285	272.0556547	263.1077503	268.3396629	266.8237966
306.9826049	252.6577135	230.5968122	231.3037715	235.6829851	233.6261664	242.5593395	220.7031234	224.3628097	225.6768759
255.711898	207.1077847	190.0735314	204.6955781	207.5556124	194.1796979	193.9857477	196.8324774	201.4576868	200.6127144
282.5067033	263.634621	250.5614081	254.5093121	258.0648158	248.5200747	252.3358172	244.6742687	247.5304321	249.8214481
298.4505198	260.4889017	241.920987	243.7066163	258.763646	257.9770535	268.1263611	250.8611511	254.247273	246.4281777
278.7588202	250.0286285	241.443768	236.7726916	239.9877711	246.8820822	246.0464013	243.3261015	249.2722276	243.2468574
272.3652597	257.9471379	252.0858431	258.9926832	254.9646347	251.560095	259.0319221	237.8003752	235.8918107	237.4623859
296.5708554	268.5634213	276.2825721	269.5616837	268.1590198	262.1660198	269.8293531	259.087784	261.5239558	260.0397926
291.2689711	260.8374087	257.6657725	255.9694586	266.0411629	260.7647067	264.9595648	248.5767031	247.2687627	247.5154786
255.0619892	242.4810917	250.1520437	246.286673	243.7816084	248.7688391	251.4184242	245.6363603	249.4273251	248.1578551
274.0742431	246.3064944	246.2351017	238.7090582	241.2047671	241.2189445	242.9480142	217.0126637	216.0906603	217.0584506
295.6346063	264.8694038	256.9339713	253.7728487	259.9312574	256.8929116	258.9325723	246.9521572	247.0746881	245.7136197
263.4194365	251.0657284	245.7209611	235.9919618	231.7530785	242.915605	234.8870226	226.8706734	227.489307	226.6056491
280.0404632	255.4736764	256.0661449	255.4238109	252.5034513	248.8998798	254.0717798	244.8525172	240.9075514	248.904034
269.2980034	245.4380978	243.9173682	236.1400942	231.4949192	240.6017479	230.1079165	231.486528	226.2852067	232.6198469
274.6122834	244.5508141	223.198224	230.125998	233.7676037	231.0304437	222.6551087	222.5581238	219.4712577	224.3845426
273.241375	261.6536281	256.4188254	261.2939538	261.370405	264.6093217	264.3184366	245.394264	244.8185144	242.5548903
269.8493829	241.8300032	243.5412955	240.8907347	239.4780421	236.1510005	241.9072497	239.6225613	245.0418388	243.8147304
294.2474865	251.4577726	252.355879	260.8419974	259.5107934	248.4041683	245.026319	242.0230269	245.641978	243.6396641
281.9703408	257.4915562	245.7670783	243.6959528	244.3693121	247.6904003	236.6835772	214.2459408	217.2533052	213.3427009
275.347075	267.0788202	260.1920364	257.0890412	253.5873208	252.0198029	254.8540643	250.3047966	246.5810356	244.7308622
275.2736702	259.8353806	249.2452934	251.5135923	252.5296295	255.0544274	253.1623873	253.2369791	254.4026021	251.1759256
259.7598663	252.7126379	261.9532053	254.4549783	249.3839772	250.5437601	254.2263589	255.546063	258.787478	261.2852018
267.0982578	235.9911845	239.0636204	241.8871618	243.0209961	242.3306633	241.0307432	235.2303162	233.3055138	229.0274308
275.4314377	252.2437254	257.4351538	261.6331254	258.7704731	260.7447321	263.5652205	257.6610048	247.3617502	252.7558928
278.2866881	231.7682137	230.8776716	236.1801711	233.7827791	234.4553244	230.9288321	224.0180323	218.0370855	228.7829883
287.78578	240.6281195	222.6251778	223.7768166	230.9233452	231.3748393	233.965731	213.9593196	212.6284709	206.5639017
287.0608648	247.801624	251.7275208	265.6046463	261.1308366	228.737528	251.6841916	217.0354795	222.8635581	220.9654544
291.0199394	255.3865491	249.4043047	249.439982	252.5986227	248.7715747	254.6963457	233.7859641	218.790645	228.2714738
259.7970012	219.7837021	221.7774265	223.1976645	220.508928	221.3689059	225.1670695	213.4436159	217.8320955	217.5383131
283.0769816	248.1089343	255.0128529	258.4726825	255.5700764	256.2014888	259.3533194	254.471037	248.4448642	255.343648
244.8186931	240.140718	232.1433257	225.7518496	220.5793911	217.5884769	219.6372266	217.4604368	211.2435528	214.7229522
261.1973494	242.7398056	233.0005399	234.552949	231.8936073	239.2407541	231.0742671	234.8954571	237.2371836	239.7745873
293.5462877	264.3613802	259.2337481	268.3044988	269.6469404	262.7294107	269.8746246	259.7768781	260.2039039	262.0212695
275.1441999	250.1919824	258.5746215	264.4010683	260.2319967	253.91701	262.8184799	257.2178019	252.1043878	254.2817048
296.3830188	272.0825626	277.7369139	283.1488001	279.0980282	272.9486407	283.9943523	275.2203732	269.8871261	274.2608129
289.0719914	282.3023679	275.6756113	267.2001215	271.137184	272.2810522	261.2667852	255.5719639	239.8243544	251.5547695
272.3669018	239.2448893	235.3368561	227.7314898	234.7974022	230.8278614	231.7276343	231.5176133	228.8827803	231.7212165
281.9465741	246.6866917	249.3432425	249.3278351	247.3760613	250.1188521	250.5103066	235.2739973	224.88732	235.9611162
274.6563641	252.376765	258.9089339	253.9316201	252.2362729	258.5523661	259.9851091	247.1699708	245.5052624	246.1030647
263.5595572	266.2380074	268.1474058	260.4679002	257.7804272	263.0114441	256.2637219	251.598666	230.617223	255.7452299
264.5706626	237.9755167	236.5779437	239.0213269	238.2003803	239.9971281	239.7579851	233.4803928	236.8385152	236.028054
248.0227064	220.0067298	223.6635926	217.8373387	217.0478258	220.2592948	220.0789175	217.1751004	214.6512212	215.3163827
301.8198449	279.648701	273.2157089	267.2449038	271.2958504	260.6337698	266.8501647	262.6593956	264.2424769	265.3547452
277.7673078	244.6325608	231.1924864	221.6772654	220.7144915	225.761108	227.1760777	224.7657782	223.0781821	224.4650936
286.7315179	266.227044	273.0915231	268.9394977	264.7615761	255.8543348	256.4512848	230.4866098	230.8479492	232.4720364
301.8646578	268.2838083	241.3566836	269.1039346	270.8013156	264.4236848	242.599841	241.5870492	244.8416762	246.5368935
277.6925306	265.4844306	262.6313834	253.7100813	257.3521813	256.046479	262.3105993	256.4737586	256.9500915	256.3910293
265.7793176	234.7780069	221.6125061	228.0132691	231.3178139	233.1656951	228.9639221	232.0149872	236.168532	234.4059687
276.2911652	246.6054231	237.8806908	233.7082365	236.9613069	237.1935927	239.0100919	234.6788802	233.3003636	226.7203808
250.1569805	237.8120556	240.0675649	234.1840267	228.3202602	226.3789873	235.0070235	237.2659377	240.9699864	236.2129941
293.2866	278.3695344	267.7782141	270.8174479	267.9563195	255.1805511	270.9183413	261.4826221	252.468707	260.6169578
301.1191794	269.9087741	268.1068385	274.7770345	277.7349735	274.2821443	270.0269043	258.2117433	254.7175147	252.0842043
265.6711048	247.4642803	241.6150657	231.4274064	226.1519828	224.7976754	232.2593971	230.8796022	229.6481655	236.3217238
245.7270164	217.5665618	218.5978002	227.9245421	222.0319475	220.6517641	201.8864132	213.8814663	212.5694647	217.5441707
291.3689147	265.0825725	265.2777972	259.6418907	256.5005968	246.4250384	254.3850755	236.8966853	233.1813636	241.6929688
269.8130171	245.3569389	242.7790302	246.763897	245.8854841	245.3605145	250.9817664	240.2908722	245.8535921	238.7931848
266.1927144	240.468201	228.1482586	238.7461501	244.5195238	248.6419797	253.2229182	246.8329189	251.4794972	251.9206232
285.8259918	262.6171102	253.6587915	265.4252325	265.2203032	265.9712003	255.798811	253.4930624	253.2199289	250.7548778
292.8757622	265.5090819	261.2288213	253.5639117	255.8003037	242.4627799	242.1276606	238.1851057	240.9623121	235.1204434
274.9945921	262.8873699	257.0432728	255.6714343	255.5670581	258.9184303	258.7629067	251.6517853	249.8881121	250.4996843
274.696171	257.1148461	262.1358359	260.1338184	256.4874411	256.1845651	261.4901444	258.0052531	257.2132159	252.0259698
274.6388586	259.6368273	257.9958772	254.4338504	250.0648156	251.3758769	251.8482137	247.930766	244.7471915	242.5392959
233.9364249	224.6555863	227.104116	226.02203	223.7669796	231.7418474	225.8726823	225.8361612	226.5140359	226.9082956
290.1890528	270.4049855	271.1095638	273.7493203	270.8526477	265.960899	271.5895028	266.3676916	264.3210663	268.1025267
280.3152035	256.9517523	258.5467675	259.7184925	257.3621445	261.65491	263.8645627	258.8047863	262.9763548	264.5559197
282.6338039	260.4163447	242.2496332	237.4126778	255.3851793	245.3176487	261.7662271	251.0908992	252.3171993	255.8273011
292.0444014	260.957445	255.6641089	245.28795	250.1922209	254.2626392	248.7856405	245.0901335	248.7649039	243.4040275
289.1502172	258.2813616	259.7411751	258.0310643	256.4360622	255.8853153	255.2257738	247.1245272	252.1221929	249.7284437
281.5095803	236.4034051	232.07382	225.8785624	229.4183959	231.9298501	236.0382236	225.895403	227.2945152	230.6677963
295.6812133	270.0883899	254.152006	260.0186221	269.0346916	258.9650477	272.2563851	248.1011344	249.7844591	251.8496044
278.136512	257.1374692	250.4940124	248.4917436	246.3588973	249.6822728	241.9157246	239.3852516	240.4587216	243.3113975
283.1260484	256.221397	258.3670274	253.0786821	251.8458503	250.02745	255.4461113	243.9664111	234.3546757	227.7840511
284.2987045	257.0261228	237.8120026	249.2355806	256.0776597	258.9053224	263.6198074	261.2715861	263.8541757	256.6494399
257.7940228	257.0750666	247.6682316	253.633559	247.8670588	248.4214598	248.9269417	242.674726	239.4591581	225.8297667
278.5194921	253.6830506	260.209618	271.2682387	270.7103935	265.1977689	275.2514798	265.4560778	267.8018176	266.4208231
273.1437171	236.9608697	226.7190818	222.3034411	223.4581848	227.7250176	226.7702616	227.4263352	224.7837305	219.9354568
275.7594082	260.3605215	259.8514053	260.8323243	261.6476093	264.4059374	264.3299184	263.4580665	269.3490903	264.6450216
279.0033336	265.5018979	268.6830101	268.2351342	266.8967354	267.5460118	262.4528757	264.1416169	268.5347333	265.0160589
287.6880438	277.2847443	271.9227176	263.1489067	259.4116955	250.8046597	262.8780849	255.8814846	250.9591121	256.461667
290.1143681	259.1796442	260.3457021	251.1706045	250.3531288	257.0781322	251.3653799	239.907395	244.1491002	229.1125784
306.376784	282.8431366	274.1238591	267.7216591	278.4835536	268.8926645	271.3065117	258.5728716	260.0244194	248.7285293
279.6044951	247.0494055	238.8713863	237.0381001	243.4583148	240.3256284	217.9895262	217.9530578	220.0297172	219.1841002
274.7409178	240.9416446	245.9508796	246.63317	242.2806773	249.6977673	237.7880103	242.9951521	247.1553788	245.0395863
275.5769243	249.6386545	248.4326098	240.6331189	237.8366927	240.0954398	239.8641307	227.7009298	230.4746416	228.9987891
274.245299	232.0445849	232.9629754	229.6463819	230.2434013	230.1485739	222.5077285	221.6957953	219.0490952	215.0273874
292.7545671	270.8627271	263.1074674	279.9388882	278.1096498	279.5113117	273.8713839	253.7333257	258.6525837	255.5432459
287.0420879	278.6644529	264.8879225	267.7945974	269.863695	270.468988	252.07122	227.2382507	208.5277939	211.2481279
243.0322613	223.7296805	227.4777014	229.9348564	225.2081524	233.8798898	225.426089	232.478886	232.7982758	230.521954
278.6285639	266.2809119	264.3408651	266.4049066	261.3464562	266.3349704	267.9847755	263.4991527	256.8717431	259.9379016
262.2846037	244.0440689	232.684787	224.6799023	229.1243689	222.5893011	232.1654198	228.4513104	234.0965413	226.3760761
260.332331	261.8422334	256.0547567	249.551872	244.7534251	242.9469904	253.1835073	246.5555929	239.9465766	237.5615662
299.9492894	280.2396879	269.3200363	267.0745442	276.5307573	270.0685456	276.50388	269.102471	272.1980587	264.7860181
290.3068302	274.5071828	276.8754925	267.3981412	264.6197332	267.8161418	266.73618	262.3728713	257.8764041	261.6447653
296.8099474	230.6947969	195.8513619	215.368422	236.1042422	200.3366815	238.1496478	228.8475263	233.5614098	228.7571918
269.2670506	237.0250876	229.7726285	225.272291	223.042599	226.0599419	216.7718128	216.9398116	222.7348608	220.1061528
296.8018981	261.1705489	260.1613548	270.0342239	269.6358939	267.5742335	261.8131169	261.8123158	261.8084207	259.9456863
300.6880329	280.1534938	276.732757	281.2658039	278.6488238	267.170575	280.2443381	262.8321877	264.1346907	263.1102493
265.8864889	242.9319358	241.4596614	247.3234275	245.3331713	250.5530501	226.8567287	229.6242128	226.8800624	231.808958
271.4912781	238.1367444	241.6260648	241.9511515	236.2854106	228.4631324	225.9425098	223.9970143	228.0557025	227.6783016
261.6935427	238.4947396	219.9750027	232.1807144	228.6017645	215.6744874	220.1700379	215.7233817	217.5820442	199.7156914
274.2452991	246.1641205	238.7063939	231.2204247	235.9420494	235.4894746	229.4880172	227.4049562	224.0805707	222.9871218
275.347075	253.7032965	247.8779122	245.8810304	242.2083066	233.9067828	245.7222452	226.1715135	227.9671952	227.2683903
279.0033336	273.1154003	274.9295105	269.8411146	268.2587988	271.0259928	268.3063979	266.3471822	270.1611355	256.5022572
272.9699648	241.0333257	238.5858222	236.0091432	238.8017385	227.8520965	227.9826277	230.0095745	233.643088	234.0992972
287.4800764	240.0314041	236.0093971	233.6282609	238.7650174	229.5226547	224.8520441	217.4095453	221.944314	218.0080487
281.2035394	265.1165758	269.4170793	263.24001	261.2867046	263.1966661	267.3440837	256.1607677	256.284599	250.6203462
284.8172465	265.2364148	268.991187	266.8391425	266.2718736	267.253112	249.1594735	252.9197637	251.7143432	255.8707208
293.0123947	270.4607422	264.2190078	264.4400628	265.5876826	257.6102469	245.1158479	243.8469766	241.380578	244.7274429
273.9542295	243.213515	230.5174878	226.855673	231.6624523	226.1871332	215.5344406	216.5843493	209.5178851	210.872567
280.0014012	249.5662083	248.6419878	247.9397996	250.3951959	253.5379278	252.2929571	245.6842533	245.3094639	241.6685796
272.3652597	252.3530231	238.1876662	254.9289435	255.4208653	250.5917063	253.034689	255.7354508	260.2473319	246.0570638
279.2021968	262.8785304	261.9515007	259.7279682	256.8242638	242.6796491	256.3175913	247.0169014	249.4208616	249.2480652
237.8722841	222.6283568	222.7372927	216.986066	211.6453601	220.3508742	220.7459248	222.7898026	224.7245861	218.2746422
285.4683849	270.7926723	263.6924565	259.8461503	258.6752605	253.9466192	259.1339795	254.3598174	252.113625	253.046891
285.314481	265.2160317	270.08677	267.3070079	263.3971351	265.8663039	257.414008	238.942303	236.7370072	243.9857325
270.6249963	238.2294014	239.2406245	243.6058704	243.1177767	242.38037	242.9864021	240.0173786	244.1382268	239.982322
292.545514	254.5669875	249.7352974	258.362185	258.7622545	254.1945933	257.4014538	255.3787429	259.7568916	256.2548044
266.4348421	248.6079789	246.1462198	240.7064596	239.871799	245.0056456	241.5458296	242.2908455	242.328567	238.6891632
257.3987162	239.1107359	229.3404625	228.9081895	233.1797376	238.6397868	232.67544	239.0684584	244.8095576	239.9536905
270.7346275	267.5507782	263.4189733	261.8136557	256.8732947	254.2024581	258.3974786	250.0169767	252.2018184	254.7411201
235.0658425	220.5572398	218.7585443	213.5493347	215.6098603	226.4134654	219.296725	217.3601949	205.7013576	215.4201728
261.1848257	223.3910619	224.4170475	233.5486447	231.8941851	236.6630877	227.0637104	228.7452833	233.0549652	233.9228778
285.3654655	256.2601383	252.6064815	249.6975419	248.7237318	252.0402942	250.2141542	247.9243229	248.834561	246.1803456
284.8979335	279.8668283	269.0892272	266.5022866	263.8714254	258.1663344	252.5422478	242.1052253	243.7855914	246.762907
281.3904776	255.4536842	259.0295044	257.7396853	257.6967535	253.453579	240.9886511	226.14507	226.98139	227.8113521
257.1513645	245.2530394	245.1679022	235.6544947	236.7749827	243.4523803	238.6939954	234.748557	227.7798207	229.6266656
262.8795572	243.8353007	241.807214	242.9984912	238.4357998	237.1024641	241.1685348	225.8136281	227.1433949	221.0535629
266.7954857	257.9027131	255.7645125	260.689237	257.1055191	262.1313179	251.7913573	248.01226	246.0274467	242.1825356
285.6675316	244.5107782	239.7493251	240.3542192	242.2755188	242.810472	242.1364045	240.8860655	232.2353017	243.0159231
275.347075	256.1040535	251.2137889	243.7630639	251.6185719	253.1316437	255.5642688	252.1599647	255.8659815	252.1790087
285.2220862	259.1642295	255.0789771	247.218572	250.5962482	251.8651775	256.9219279	243.4745258	240.9032294	243.3285538
286.6081348	248.118177	242.3473794	261.6201949	260.8777774	259.9820486	263.7596169	258.6553931	263.7869398	249.2431423
277.1737106	247.9810471	255.0880724	250.1692555	247.1386978	241.7971155	238.780755	238.5395231	201.5573664	230.8599651
289.4976886	274.5592439	263.7135398	254.695119	256.0565378	253.6592064	260.4606351	244.4728775	237.4152057	238.4257343
277.0187493	255.3874096	254.6465052	256.3157751	255.6342122	253.7137655	258.8424325	253.0344833	250.7801826	242.3872069
260.332331	241.0919592	245.020734	242.595383	239.7780285	235.2581248	245.7427412	227.822244	227.9386801	228.331817
282.0622943	260.5450923	252.6912746	250.0015159	252.509638	246.4699377	252.8986746	244.3885353	244.6763709	240.42001
284.185261	256.4234197	253.8926114	250.9453501	256.3448408	253.3104551	253.4672496	241.9354501	242.7957429	245.9006908
271.3243225	244.3171487	244.9722608	241.4816865	243.6809295	249.1494945	252.0650572	240.1117214	240.567056	244.3678255
267.5138334	246.5809641	238.2749769	238.6948676	242.9957321	247.9130572	248.4202961	238.7206885	238.2921145	232.8033661
284.7802904	259.9053405	249.85535	246.3792838	251.3414788	253.4168412	255.5818661	242.9370184	248.1423765	246.4518618
285.9910582	262.8532846	258.1310583	255.8242114	260.7009091	262.8621117	253.2291007	249.8030705	253.0133934	251.2937136
276.2151829	250.7164061	243.3442196	237.1334362	246.0279523	246.9067215	257.6212889	247.8271352	249.8916508	251.6426873
276.610935	270.2673994	271.3303324	267.6327789	265.7738692	264.9308765	263.5289919	256.5463316	257.9399419	257.1848889
262.3554094	220.8361405	209.5436344	218.6251516	219.4966268	215.1462309	210.2867913	216.0754156	219.2092227	217.9261248
259.3657279	240.0780281	245.3020669	243.7029019	240.8421782	234.8822458	230.4217898	237.5474799	241.695006	242.7716969
253.4752993	228.2510136	226.3678733	216.3699875	216.0244282	216.7460953	220.7595115	198.4156555	202.4125641	186.3119516
278.1014872	262.5504317	265.6606099	265.6019224	263.5349403	249.5082058	265.8379225	255.4727998	260.0797262	255.6421896
274.696171	225.3027827	216.1856416	220.4813172	220.505493	221.4755389	215.19043	215.8491924	221.2869074	213.9644346
266.3180592	244.2154739	236.1630123	235.6958494	231.6938146	230.1778941	216.8309695	216.2904698	218.5891451	216.7227149
280.0745516	262.9053527	251.247725	246.690242	254.4356461	245.6479042	237.2740488	218.3298397	214.265663	219.8217241
281.9703408	285.8235361	258.6657213	264.0333594	258.8107149	255.2755675	264.8908273	261.9624976	263.5993395	264.8435324
283.8742197	263.0288112	240.5877041	245.4855021	260.1411481	252.6761333	251.7754857	243.1120857	241.054672	243.0118928
277.2077208	209.1717986	209.4732726	213.8261139	209.8839106	214.3928966	191.5510274	192.8682869	196.5083691	195.6690372
264.5706626	237.2251215	233.8071844	240.4248215	241.0220427	231.8924258	247.8220081	238.7005139	243.5630521	240.318589
264.0394895	250.8290313	246.5521753	245.1084673	248.8346858	236.340088	244.1868176	241.6084975	242.2870001	235.81186
275.3323635	260.3501939	258.8924251	261.2786106	258.7064434	264.1571049	263.380709	258.5222995	264.0530225	259.3215104
284.1434652	250.7965951	245.1281195	244.8311047	255.2632409	250.7307039	261.7034943	248.9388068	248.8232879	249.3105784
277.0187493	231.629728	218.482446	226.3905631	229.7451639	235.169886	237.5142112	226.4133904	230.7314626	223.9108563
288.3788195	261.3748907	263.0626425	261.3770147	259.2620776	259.3900592	265.345586	250.1625007	253.6887107	249.7161227
283.79972	257.9702646	263.1133241	272.4067132	270.7741259	267.1405138	267.7447613	254.4915894	245.1804058	251.2329989
273.3713174	256.1307618	253.5813025	257.8103164	256.1707934	258.9245516	255.4893491	252.8556423	239.4219903	239.8239437
290.5979469	255.1266225	232.6035162	229.1892206	237.1514679	231.4093218	243.8951666	234.9807061	238.6900995	236.1012601
252.8375599	206.8272728	196.6262971	192.6143614	193.5351713	201.3917004	200.2358443	198.3039441	197.1024908	195.3062105
298.0218036	265.0304577	260.9513439	263.8290597	262.2229261	261.6801745	260.1423477	253.8736796	252.2368224	252.5429938
274.9063986	236.0208477	218.6899897	213.0032386	224.2771005	225.7870614	230.6696938	230.2919754	234.8496172	230.00118
288.1497772	273.2384605	261.8606796	267.6682346	265.1470987	267.5600691	260.8929911	260.7447429	263.7926481	259.0942815
276.6438123	250.6566135	248.612261	247.5130335	244.4879642	248.6492781	238.3391241	220.221788	218.9154229	217.1509493
[truncated: 3,001 more rows]
